# Supplementary material for: Modeling the drivers of fine PM pollution over Central Europe: impacts and contributions of emissions from different sources
Source: Copernicus journal article supplement (doi:10.5194/acp-24-4347-2024), 2024-04-15
Supplement: Supplementary file 1 [file acp-24-4347-2024-supplement.pdf]

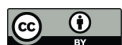

*Supplement of*

## **Modeling the drivers of fine PM pollution over Central Europe: impacts and contributions of emissions from different sources**

**Lukáš Bartík et al.**

*Correspondence to:* Lukáš Bartík ([lukas.bartik@matfyz.cuni.cz](mailto:lukas.bartik@matfyz.cuni.cz))

The copyright of individual parts of the supplement might differ from the article licence.

# S1 Statistical indicators used in the validation of the model experiments

Pearson correlation coefficient ( $r$ ), normalized mean bias (NMB), and normalized mean square error (NMSE) are defined as:

$$r = \frac{\sum_{i=1}^N (m_i - \bar{m})(o_i - \bar{o})}{\sqrt{\sum_{i=1}^N (m_i - \bar{m})^2} \sqrt{\sum_{i=1}^N (o_i - \bar{o})^2}}, \quad (\text{S1})$$

$$\text{NMB} = \frac{\sum_{i=1}^N (m_i - o_i)}{\sum_{i=1}^N o_i}, \quad (\text{S2})$$

$$\text{NMSE} = \frac{\frac{1}{N} \sum_{i=1}^N (m_i - o_i)^2}{\bar{m} \bar{o}}, \quad (\text{S3})$$

where  $m_i$  and  $o_i$  denote the corresponding modeled and observed concentrations in the compared sample, respectively,  $N$  is the total number of pairs  $m_i$  vs.  $o_i$  in the sample, and  $\bar{m}$  and  $\bar{o}$  stand for the arithmetic average of modeled and observed concentrations in the sample, respectively.

The standard deviation ( $\sigma$ ) from a finite data set  $\{x_1, x_2, \dots, x_N\}$  containing  $N$  numbers is defined as:

$$\sigma = \sqrt{\frac{1}{N} \sum_{i=1}^N (x_i - \bar{x})^2}, \quad (\text{S4})$$

where  $\bar{x}$  represents the arithmetic average of all  $x_i$  in the set.

# S2 Figures and tables

Annual cycles of average monthly concentrations of NO<sub>2</sub> and SO<sub>2</sub> averaged over all suburban and urban background stations in individual cities during 2018-2019

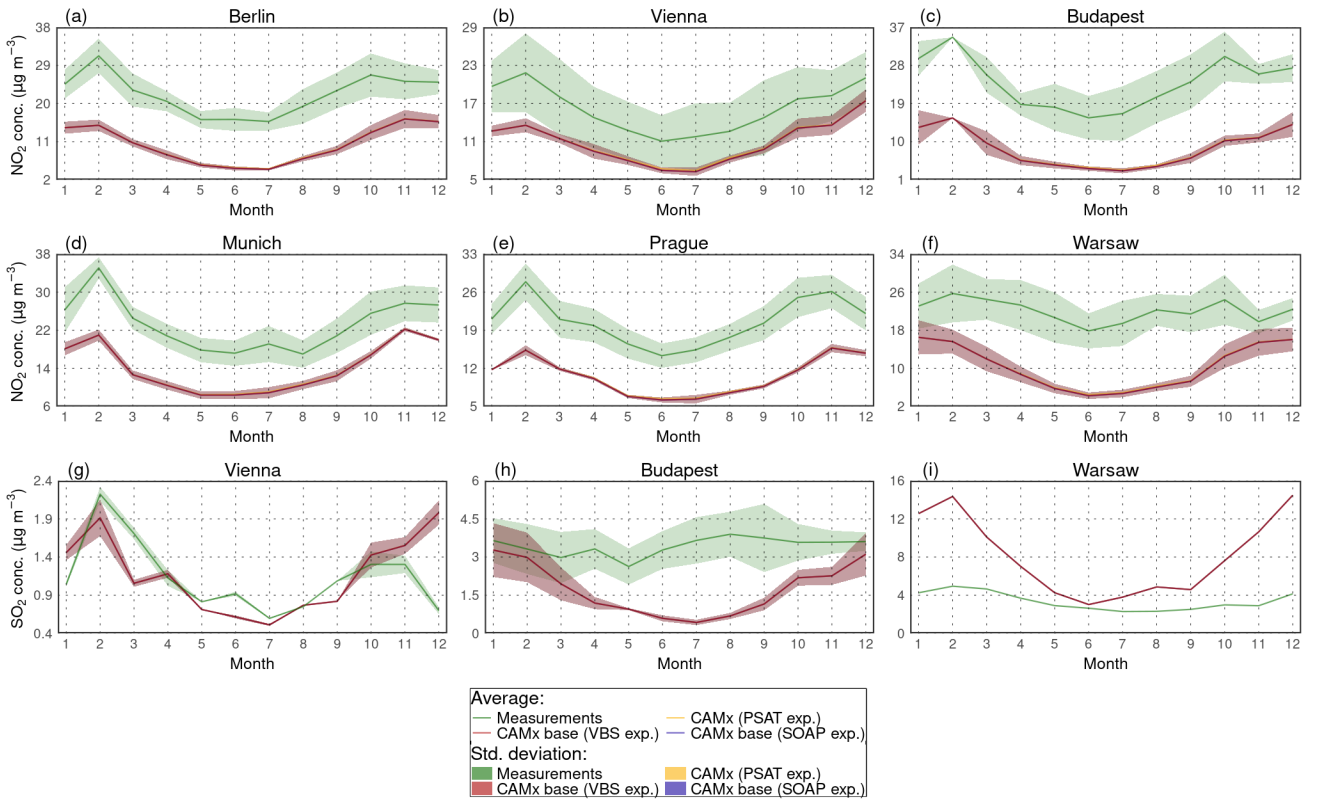

**Figure S1.** Comparison of modeled (the base simulation of the SOAP/VBS experiment – blue/red lines, the simulation of the PSAT experiment – orange lines) and measured (AirBase data – green lines) annual cycles of average monthly NO<sub>2</sub> and SO<sub>2</sub> concentrations (in  $\mu\text{g m}^{-3}$ ) averaged over all suburban and urban background stations in individual cities (listed in Table S1) during 2018–2019. Panels (a–f) show the average annual cycles of NO<sub>2</sub> in Berlin, Vienna, Budapest, Munich, Prague, and Warsaw, respectively. Panels (g–i) show the average annual cycles of SO<sub>2</sub> in Vienna, Budapest, and Warsaw, respectively. The colored areas indicate the standard deviations of the averages, calculated using Eq. (S4). Their color scale corresponds to the scale used for the averages.

Annual cycles of average monthly concentrations of selected pollutants averaged over all background stations in selected areas during 2018-2019

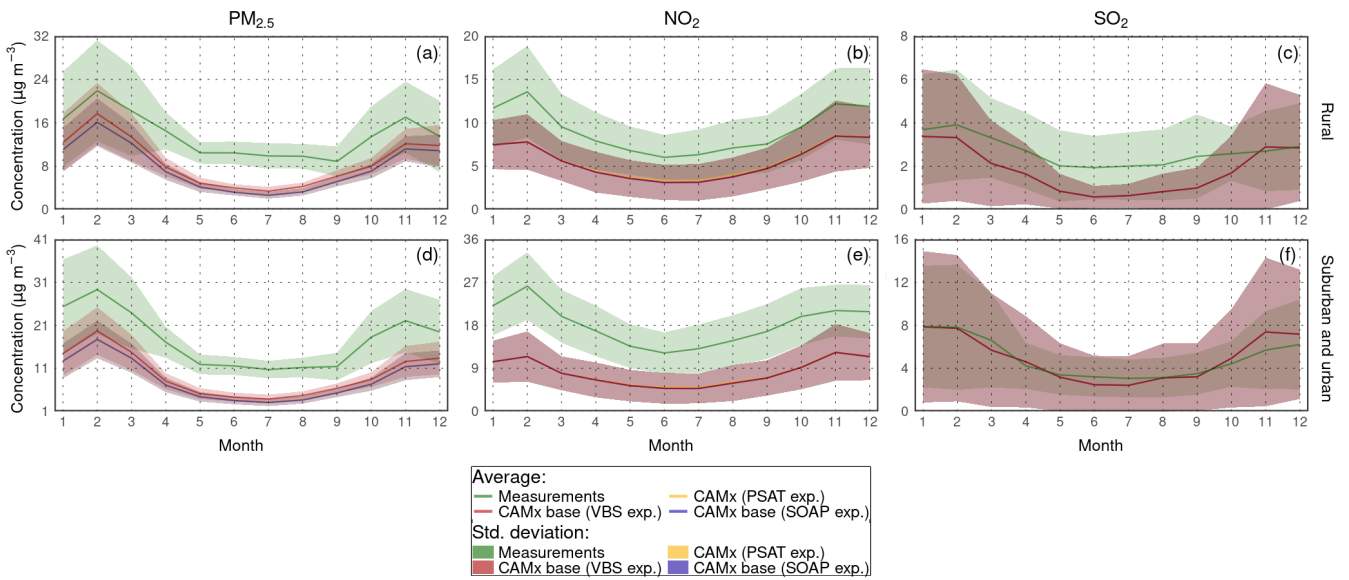

**Figure S2.** Comparison of modeled (the base simulation of the SOAP/VBS experiment – blue/red lines, the simulation of the PSAT experiment – orange lines) and measured (AirBase data – green lines) annual cycles of average monthly concentrations of PM<sub>2.5</sub> (a, d), NO<sub>2</sub> (b, e), and SO<sub>2</sub> (c, f) averaged over all rural (a–c), suburban and urban (d–f) background stations (listed in Table S3) during 2018–2019. All concentrations are shown in  $\mu\text{g m}^{-3}$ . The colored areas indicate the standard deviations of the averages, calculated using Eq. (S4). Their color scale corresponds to the scale used for the averages.

Average seasonal relative impact on PM<sub>2.5</sub> concentration in the SOAP experiment

(a) DJF 2018-2019

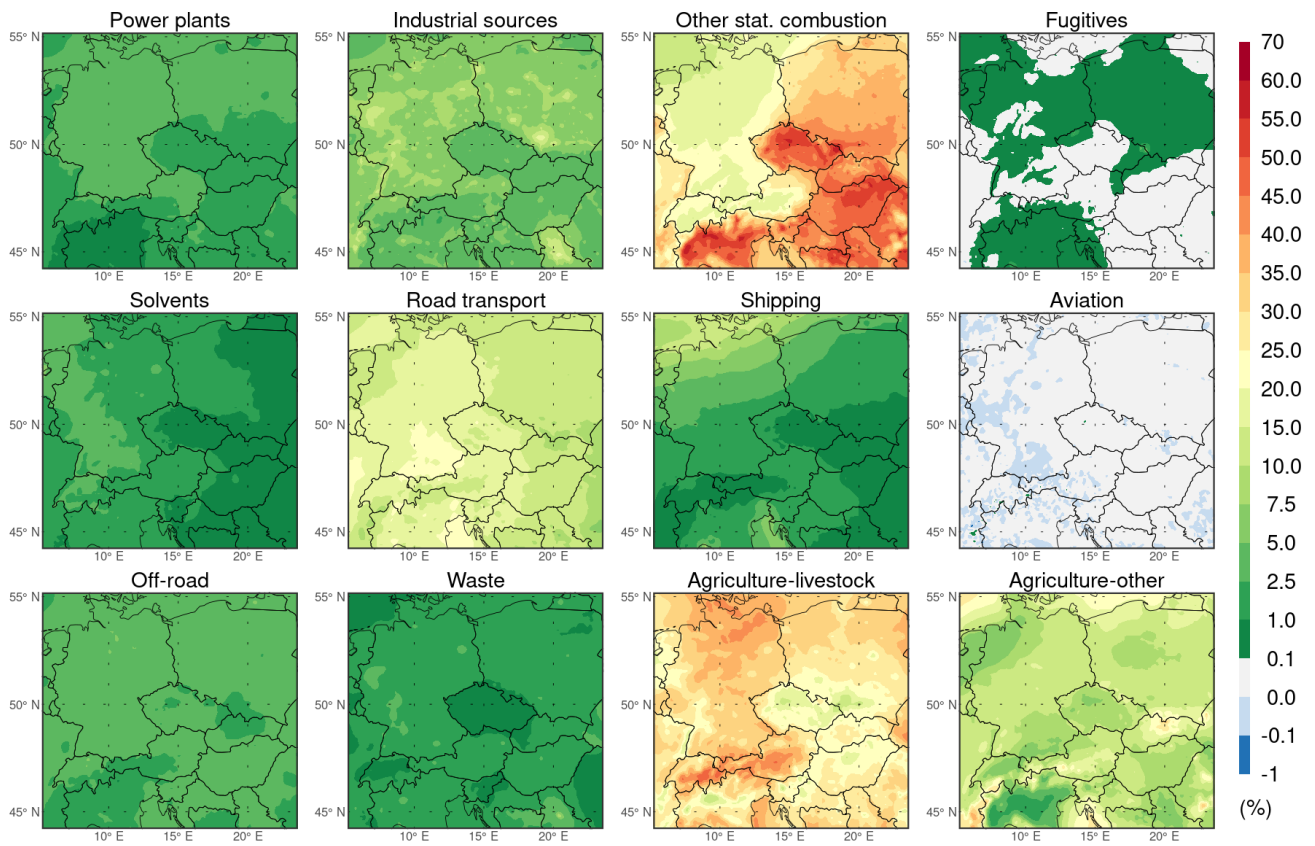

(b) JJA 2018-2019

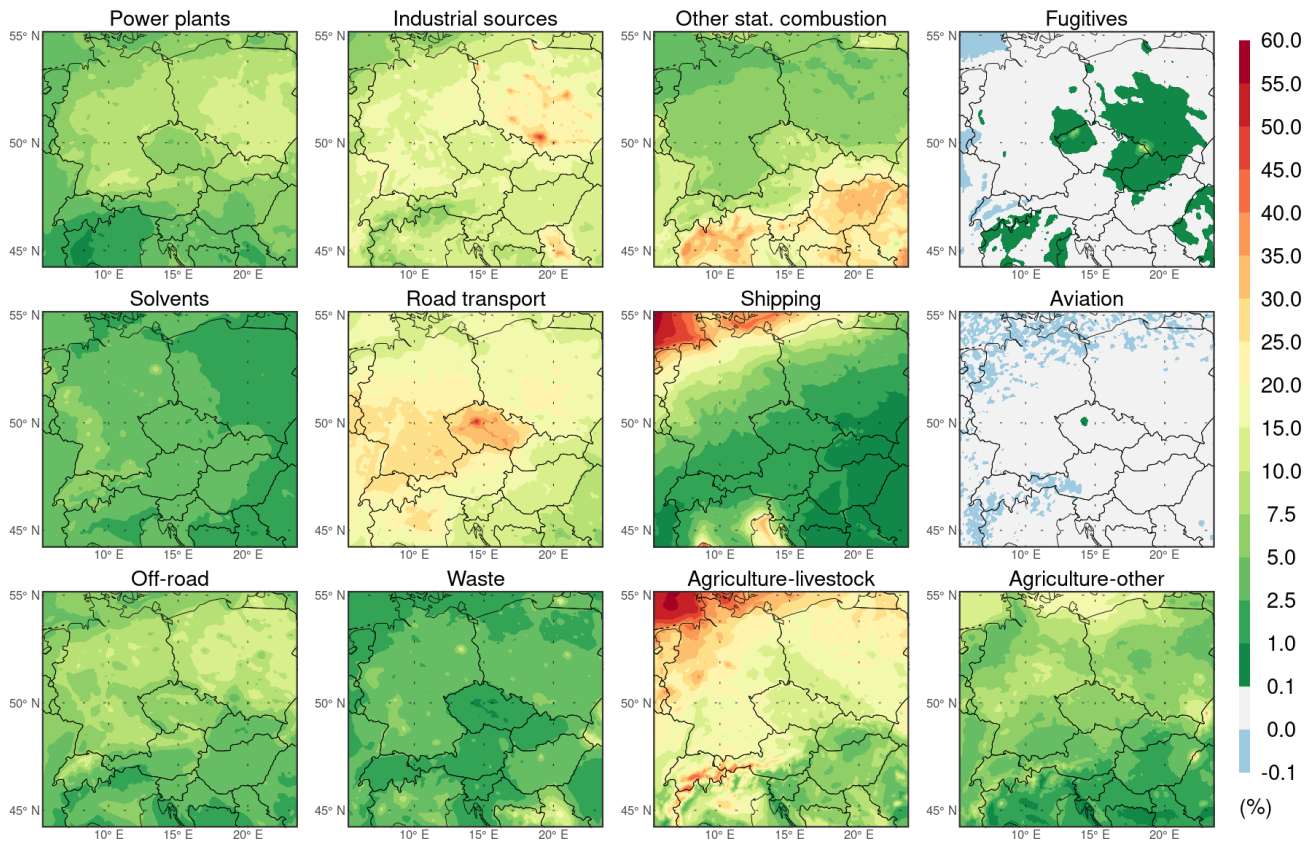

**Figure S3.** Spatial distributions of the average seasonal relative impact of emissions from individual GNFR sectors A–L (indicated by the sector names in the titles of the subpanels) on PM<sub>2.5</sub> concentration (in %) during the winter (a) and summer (b) seasons of 2018–2019 in the SOAP experiment.

Average seasonal absolute impact on PM<sub>2.5</sub> concentration in the VBS experiment

(a) DJF 2018-2019

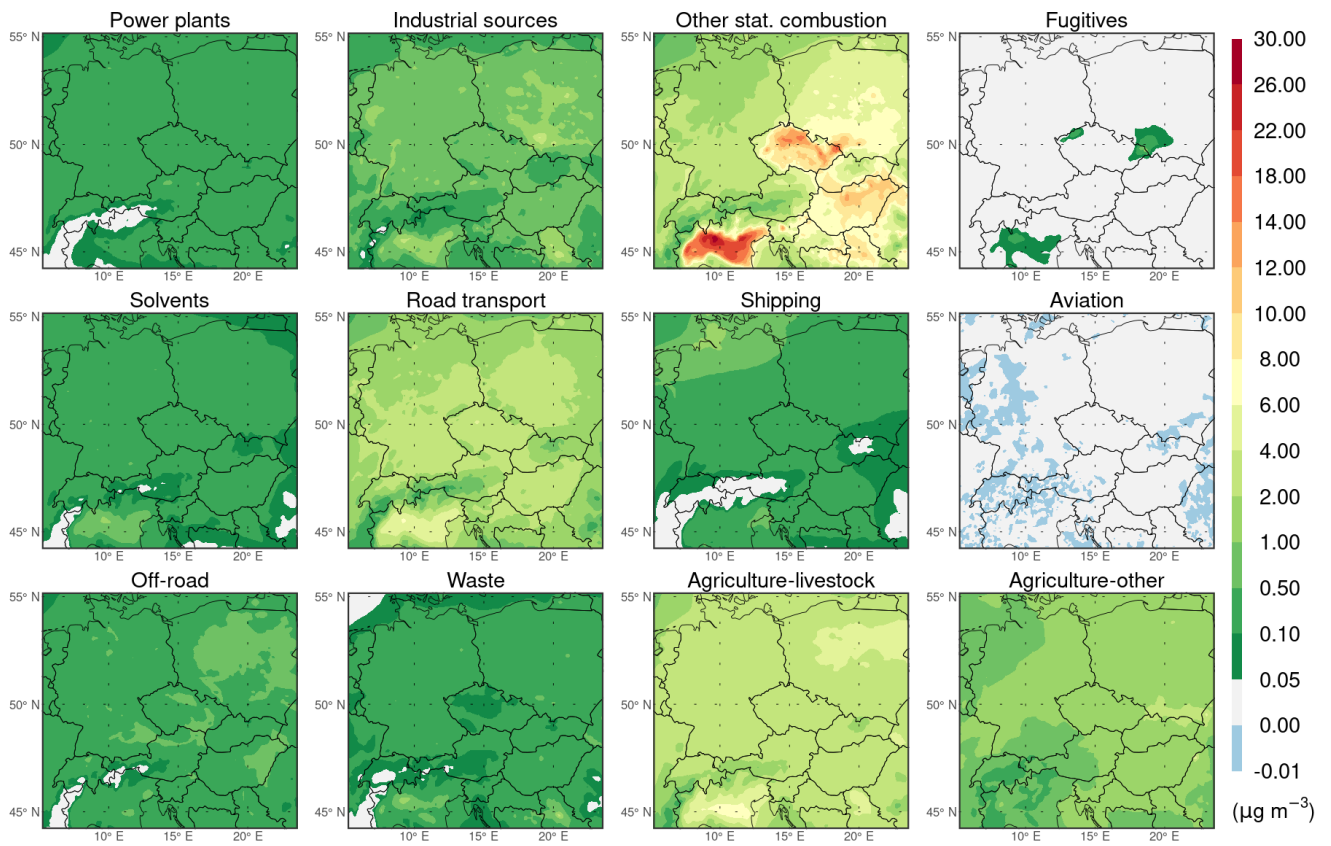

(b) JJA 2018-2019

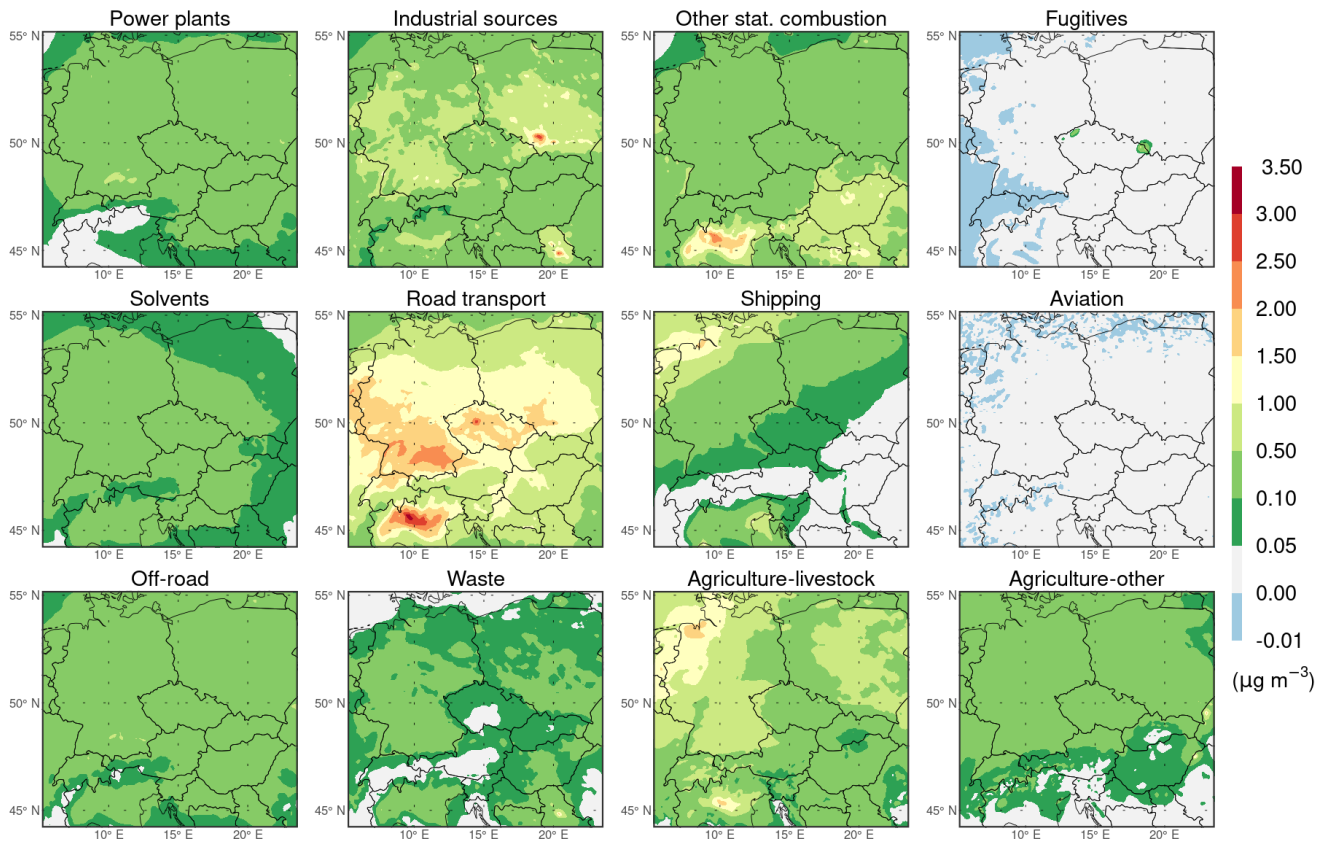

**Figure S4.** Spatial distributions of the average seasonal absolute impact of emissions from individual GNFR sectors A–L (indicated by the sector names in the titles of the subpanels) on PM<sub>2.5</sub> concentration (in  $\mu\text{g m}^{-3}$ ) during the winter (a) and summer (b) seasons of 2018–2019 in the VBS experiment.

Average seasonal relative impact on PM<sub>2.5</sub> concentration in the VBS experiment

(a) DJF 2018-2019

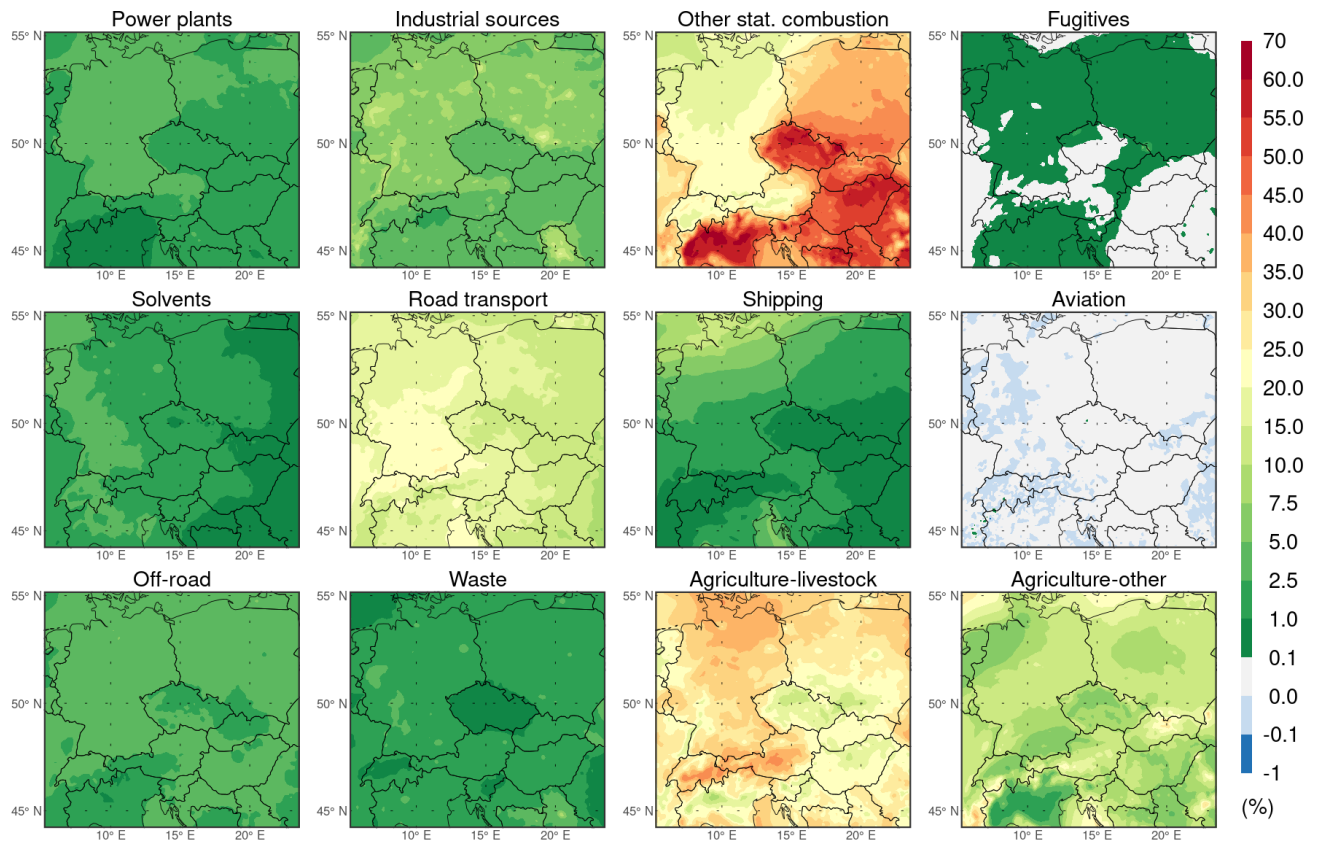

(b) JJA 2018-2019

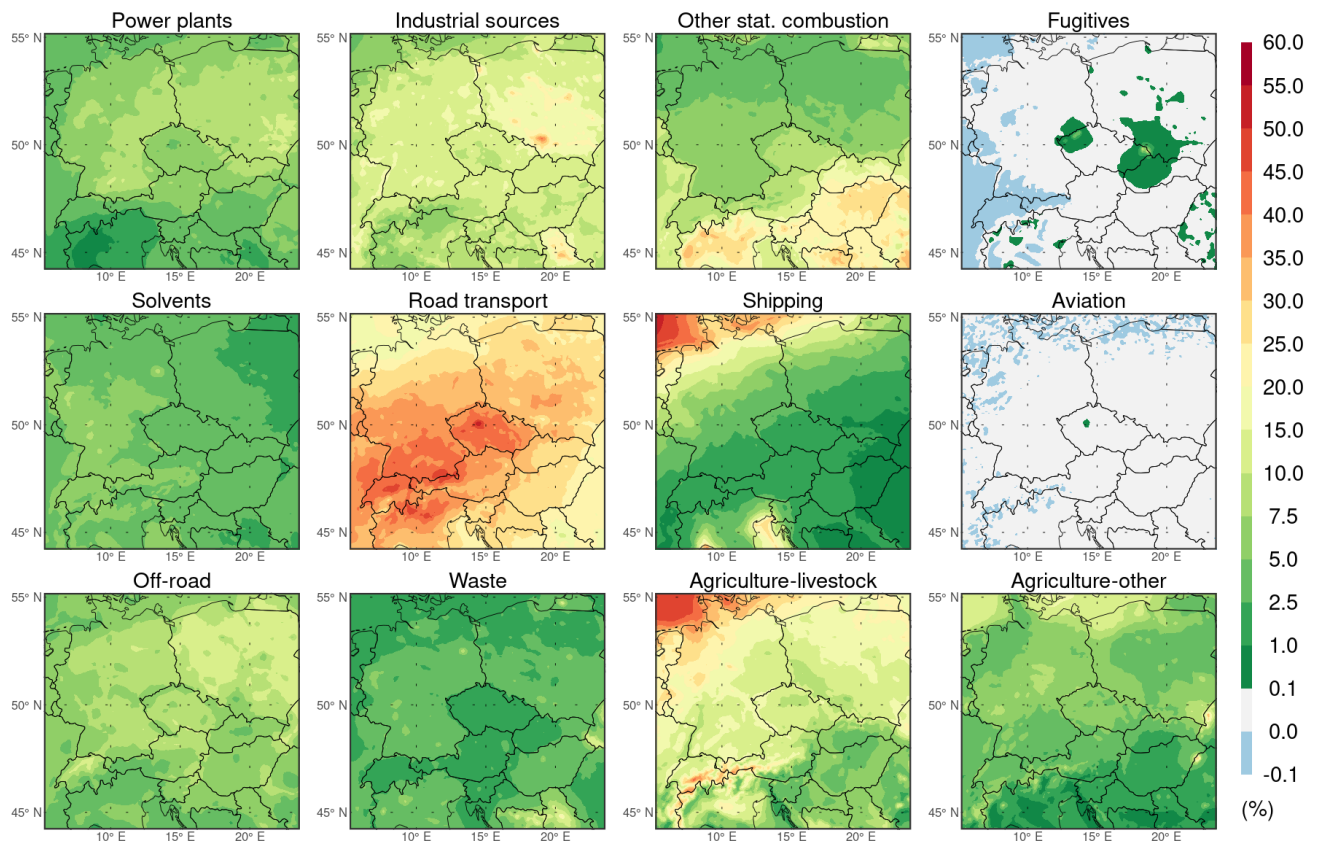

Figure S5. Same as Fig. S3 but for the VBS experiment.

Average seasonal relative contribution to PM<sub>2.5</sub> concentration in the PSAT experiment

(a) DJF 2018-2019

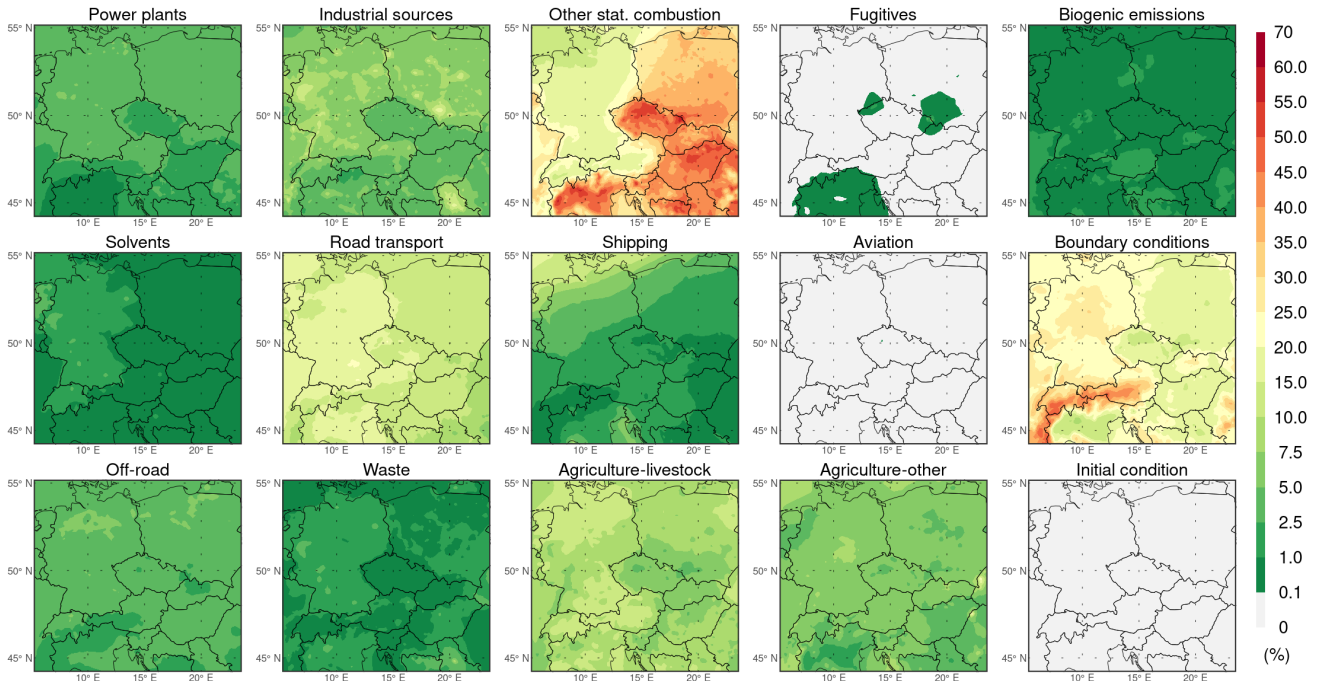

(b) JJA 2018-2019

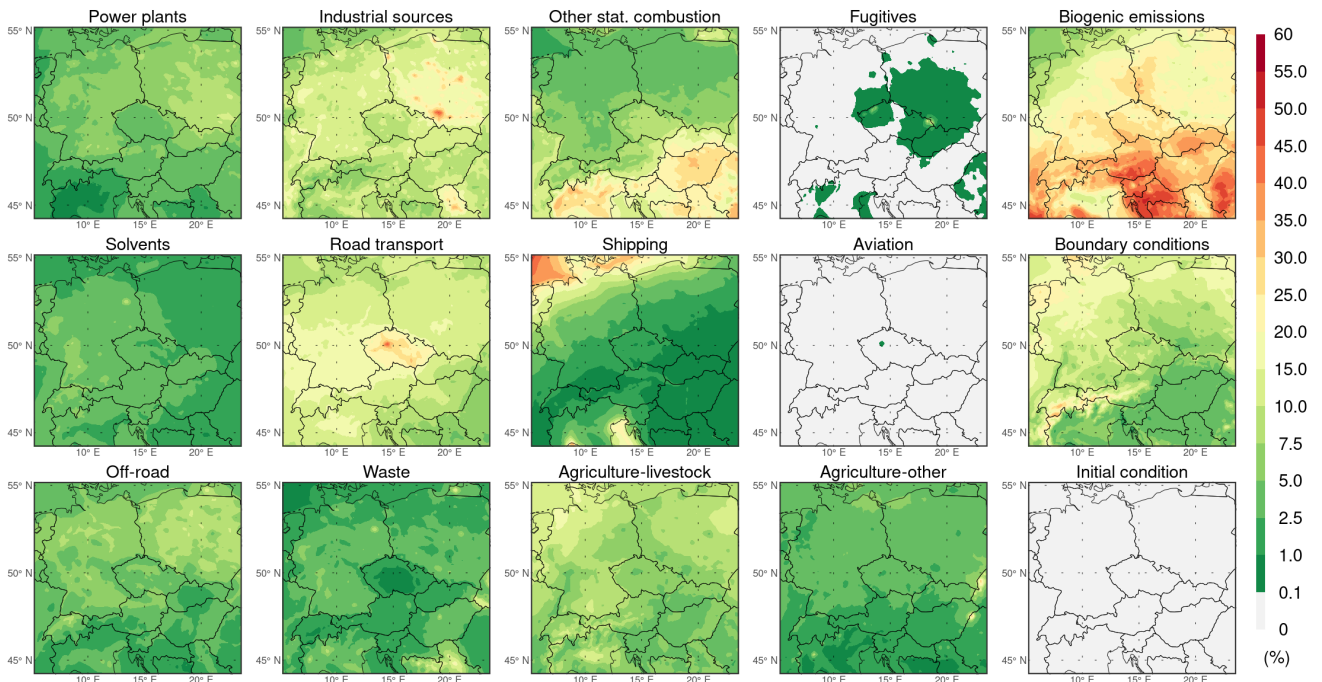

**Figure S6.** Spatial distributions of the average seasonal relative contribution of emissions from individual categories (indicated in the titles of the subpanels) to PM<sub>2.5</sub> concentration (in %) during the winter (a) and summer (b) seasons of 2018–2019 in the PSAT experiment. Categories used: GNFR sectors A–L (labeled by the sector names), biogenic emissions, boundary conditions, and initial condition.

Difference between the average seasonal absolute impact on  $PM_{2.5}$  concentration in the SOAP experiment and the average seasonal absolute contribution to  $PM_{2.5}$  concentration in the PSAT experiment

(a) DJF 2018-2019

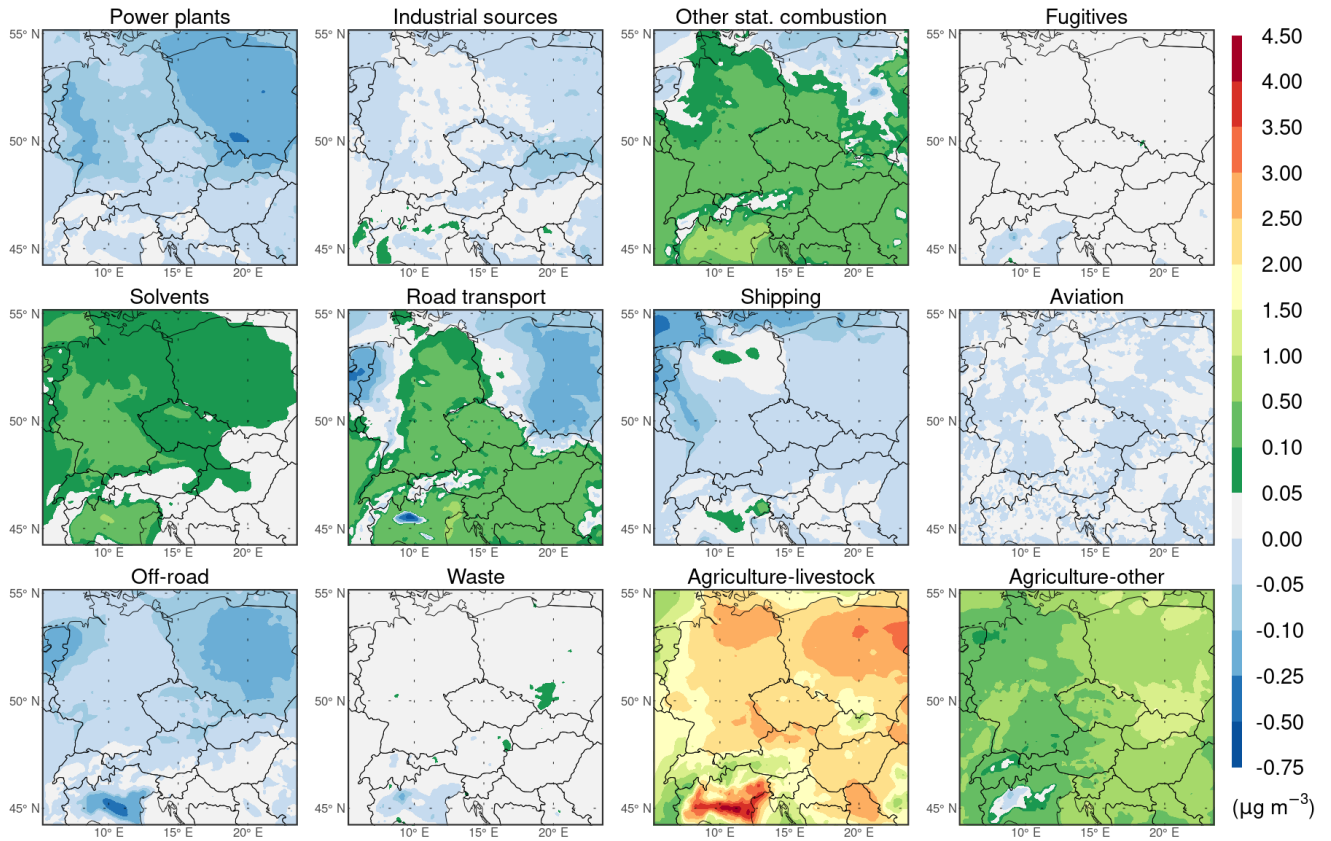

(b) JJA 2018-2019

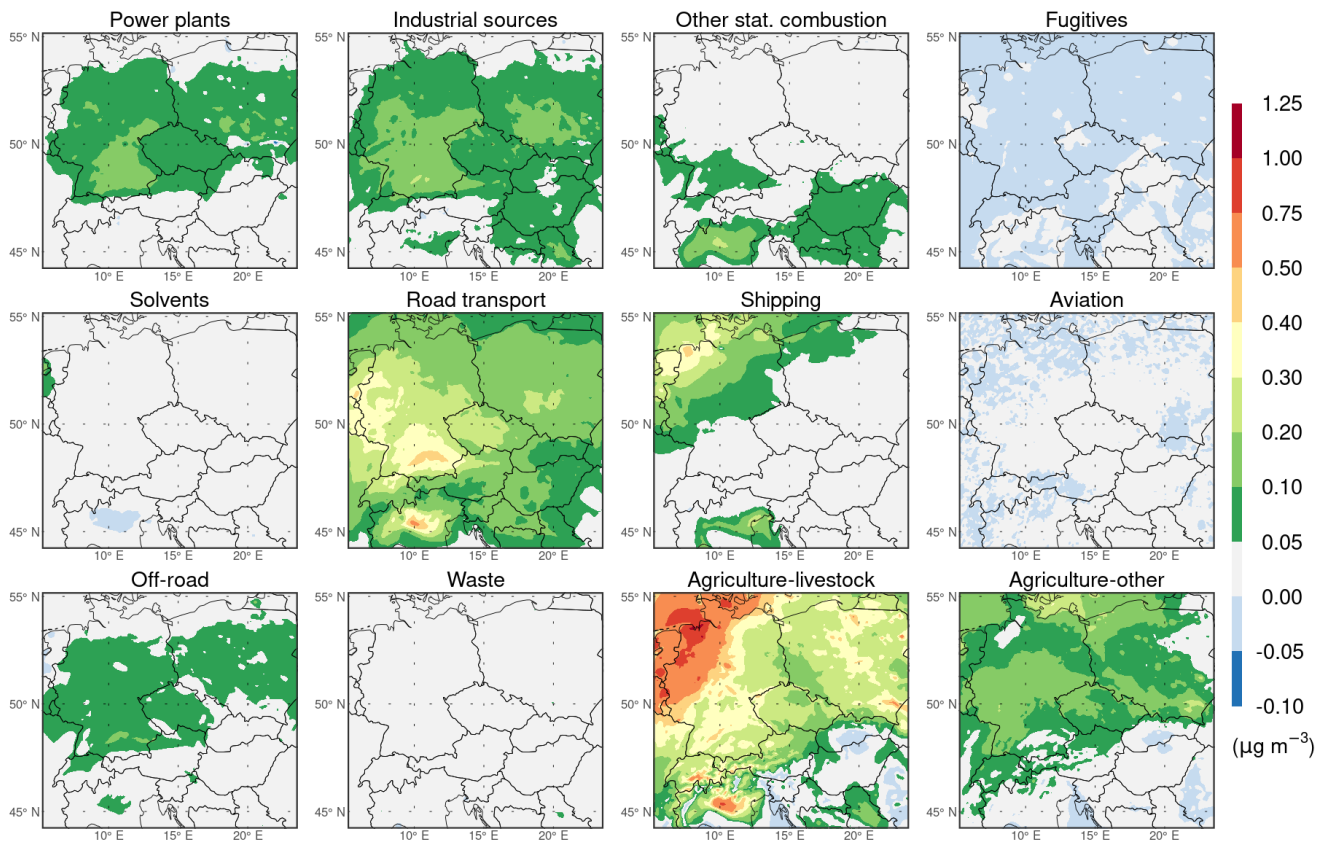

**Figure S7.** Spatial distributions of the difference between the average seasonal absolute impacts of emissions from individual GNFR sectors A-L (indicated by the sector names in the titles of the subpanels) on  $PM_{2.5}$  concentration in the SOAP experiment and their corresponding average seasonal absolute contributions to  $PM_{2.5}$  concentration in the PSAT experiment (in  $\mu g m^{-3}$ ) during the winter (a) and summer (b) seasons of 2018–2019.



Difference between the average seasonal absolute impact on SA concentration in the SOAP experiment and the average seasonal absolute contribution to SA concentration in the PSAT experiment

(a) DJF 2018-2019

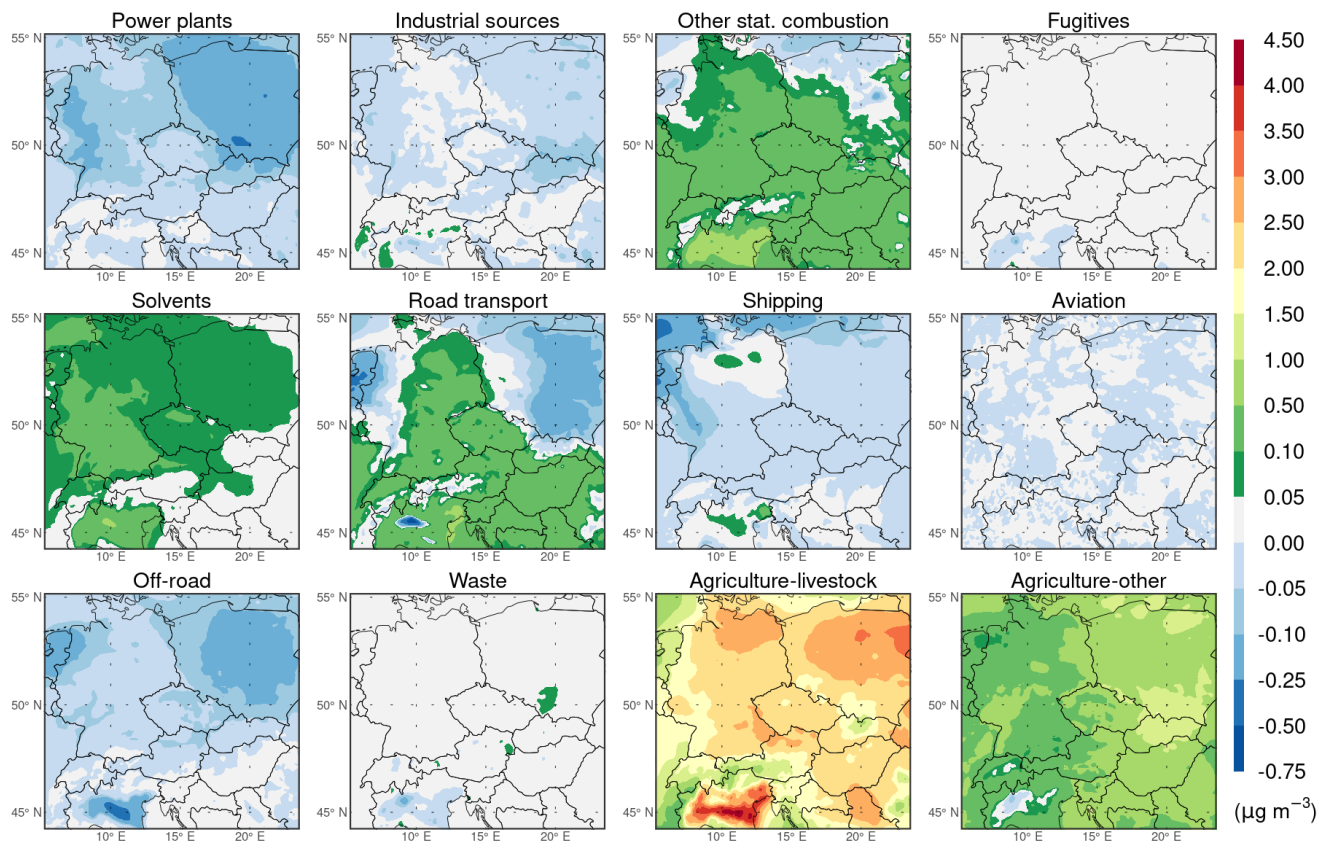

(b) JJA 2018-2019

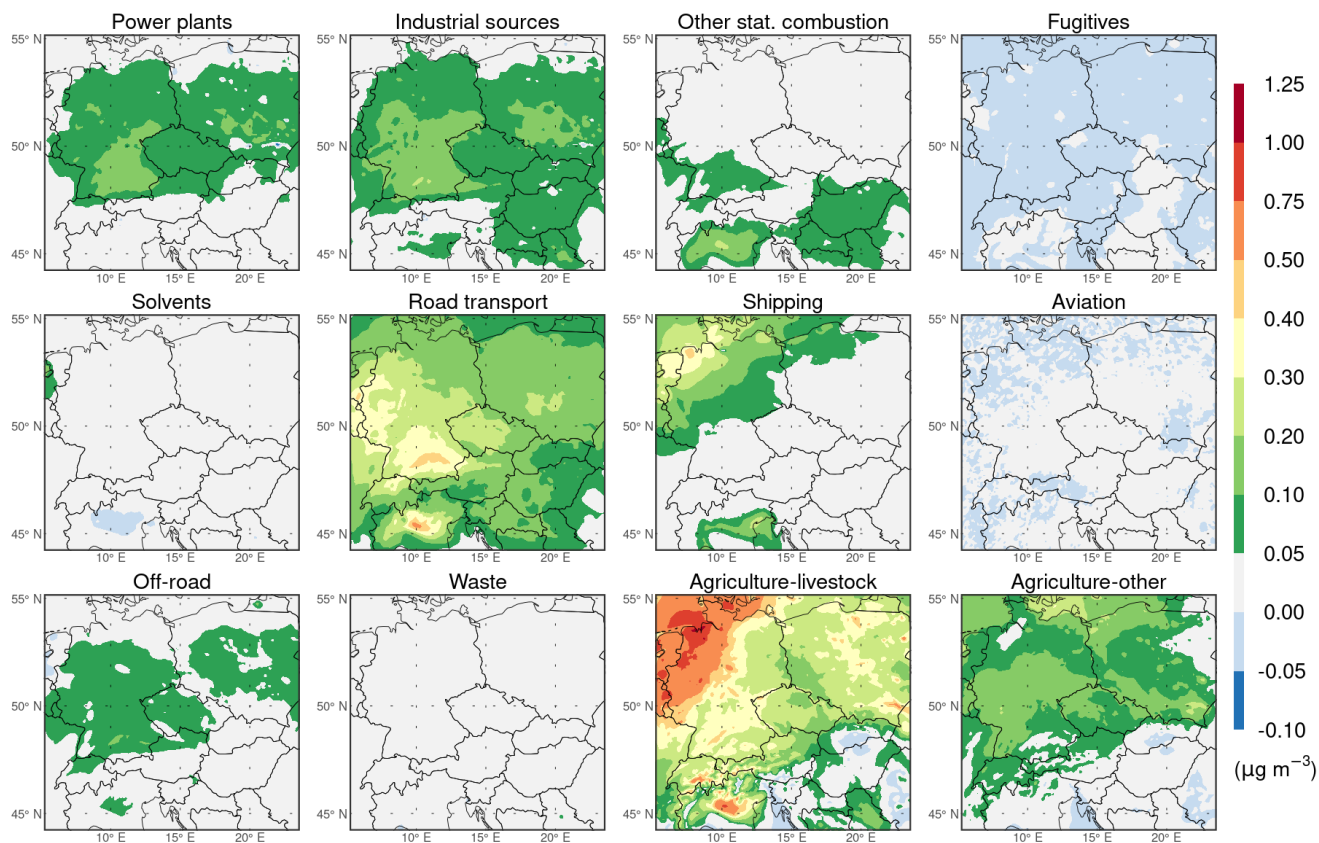

**Figure S8.** Spatial distributions of the difference between the average seasonal absolute impacts of emissions from individual GNFR sectors A-L (indicated by the sector names in the titles of the subpanels) on the concentration of secondary aerosol (SA) in the SOAP experiment and their corresponding average seasonal absolute contributions to SA concentration in the PSAT experiment (in  $\mu\text{g m}^{-3}$ ) during the winter (a) and summer (b) seasons of 2018–2019. SA is represented here by the sum of  $\text{PNH}_4$ ,  $\text{PNO}_3$ ,  $\text{PSO}_4$ , and  $\text{SOA}$ .

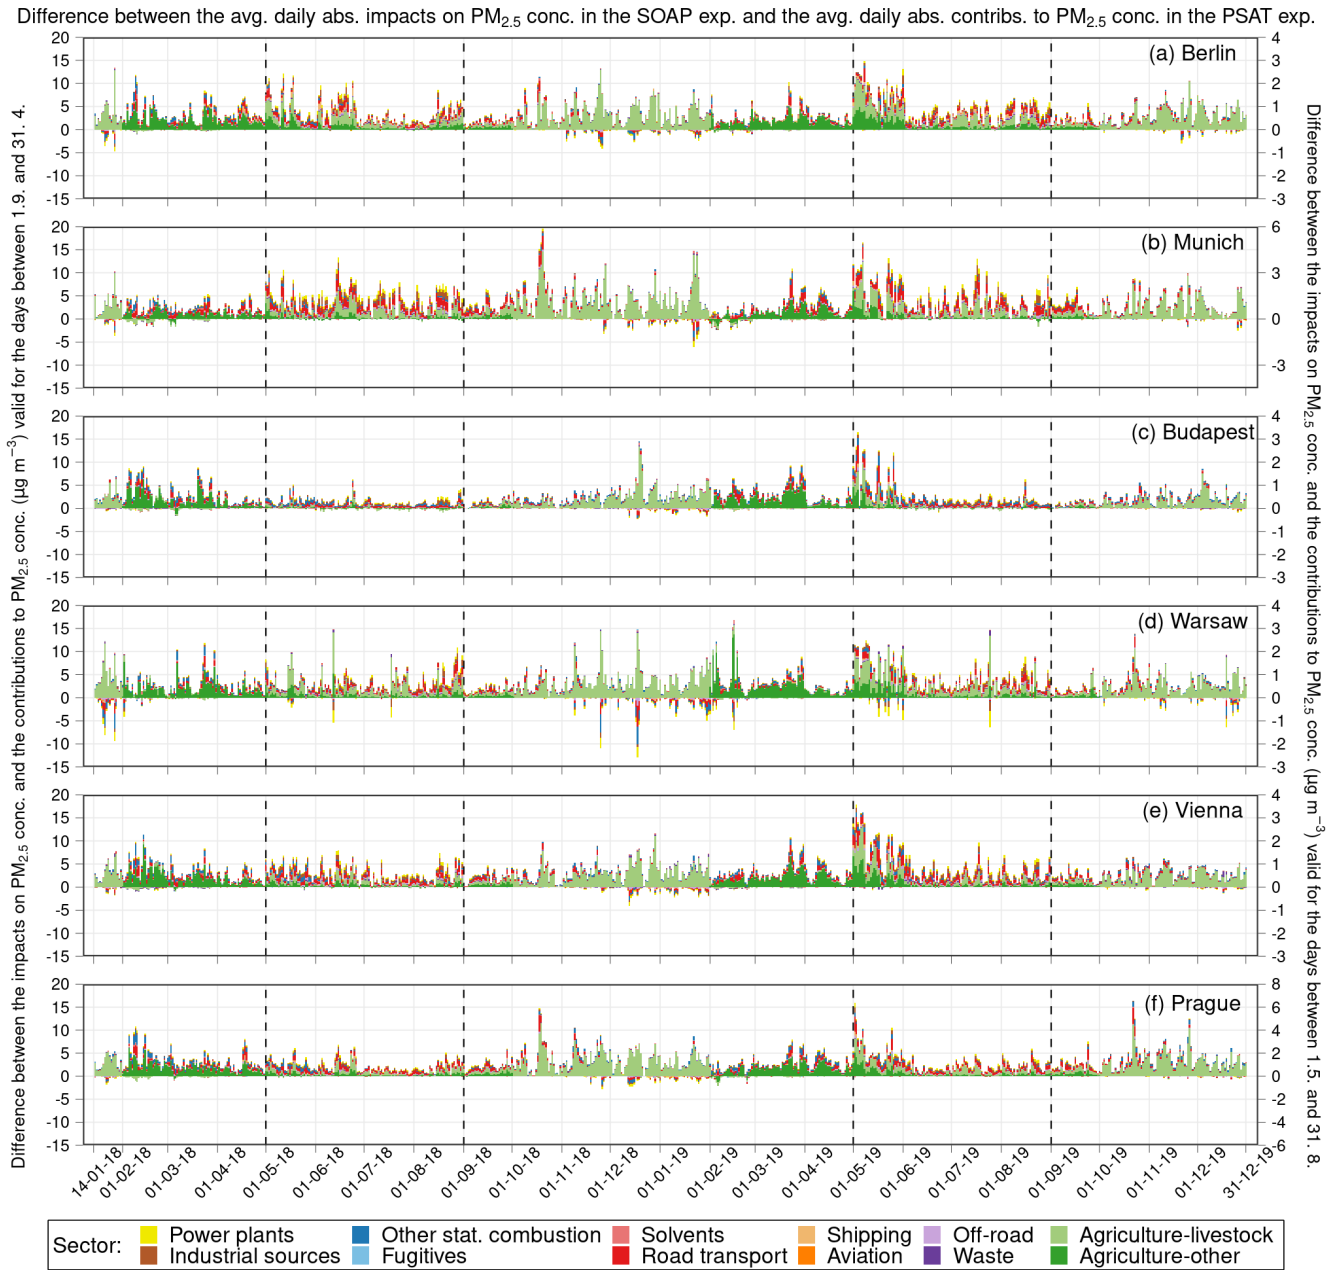

**Figure S9.** Temporal evolution of the differences between the average daily absolute impacts of emissions from individual GNFR sectors A–L (indicated by the sector names in the legend) on  $PM_{2.5}$  concentration in the SOAP experiment and their corresponding average daily absolute contributions to  $PM_{2.5}$  concentration in the PSAT experiment (in  $\mu g m^{-3}$ ) above Berlin (a), Munich (b), Budapest (c), Warsaw (d), Vienna (e), and Prague (f). The scale on the left (right) side is valid for the days between 1.9. and 31.4. (1.5. and 31.8.).

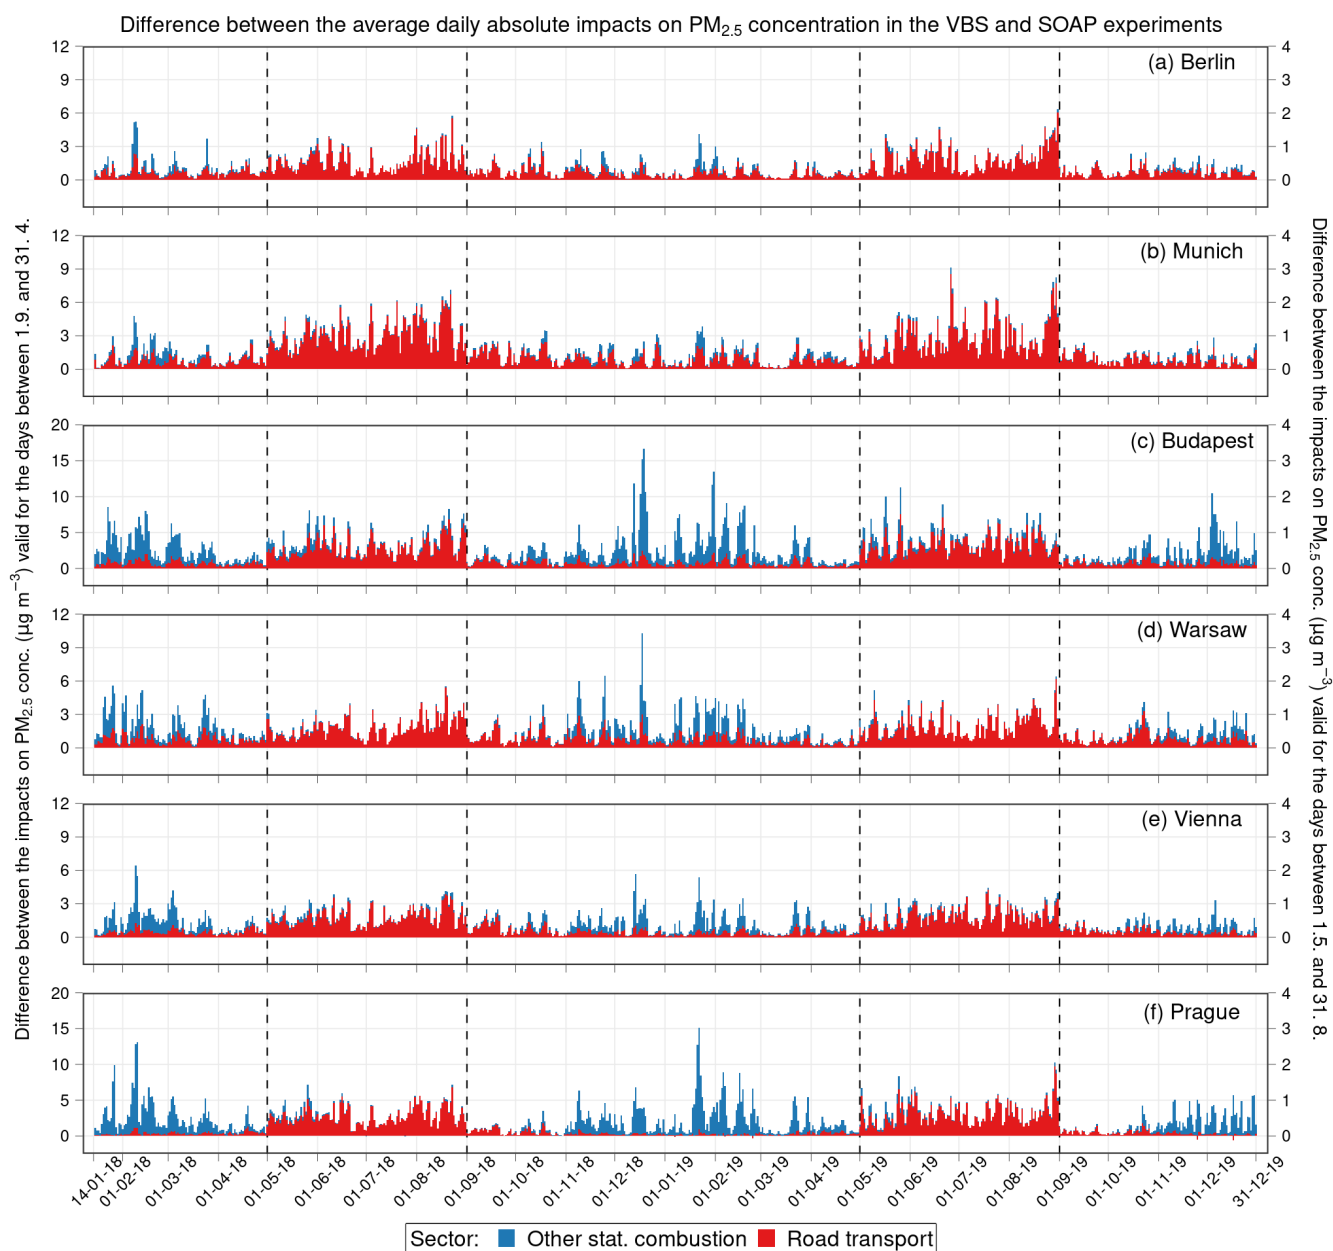

**Figure S10.** Temporal evolution of the differences between the average daily absolute impacts of emissions from other stationary combustion and road transport on PM<sub>2.5</sub> concentration (in  $\mu\text{g m}^{-3}$ ) above Berlin (a), Munich (b), Budapest (c), Warsaw (d), Vienna (e), and Prague (f) in the VBS and SOAP experiments. The scale on the left (right) side is valid for the days between 1.9. and 31.4. (1.5. and 31.8.).

Difference between the seasonal concentrations of individual aerosol aggregates in the VBS and SOAP experiments

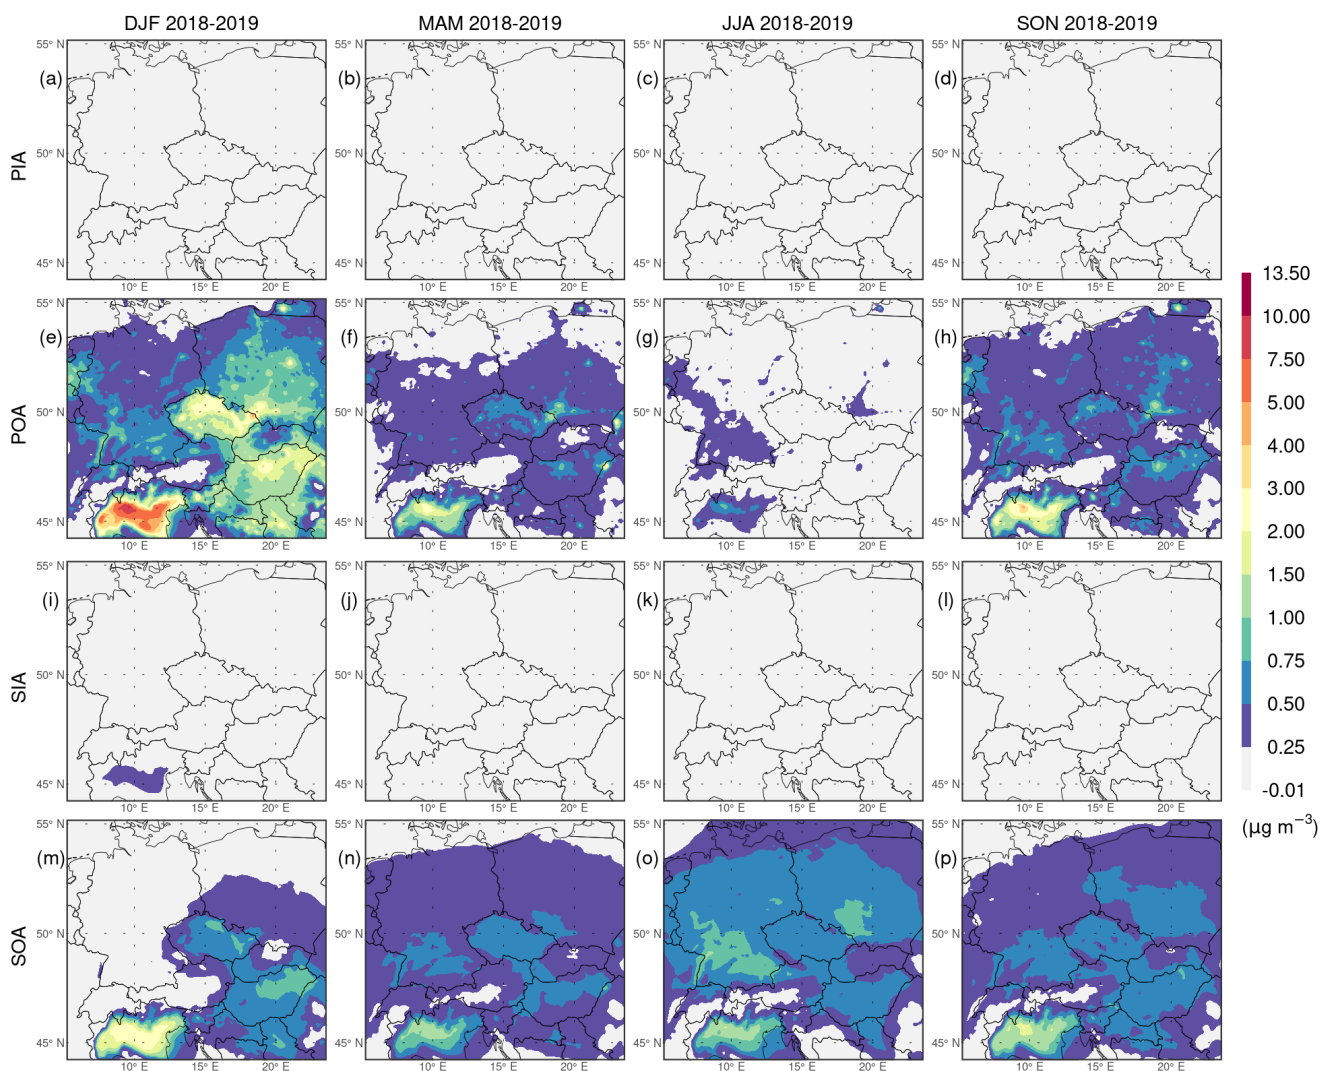

**Figure S11.** Spatial distributions of the difference between the average seasonal concentrations of individual aerosol aggregates (in  $\mu\text{g m}^{-3}$ ) in the base simulations of the VBS and SOAP experiments during the winter (first column), spring (second column), summer (third column), and autumn (fourth column) seasons of 2018–2019. Aerosol aggregates used: PIA – primary inorganic aerosol (a–d), POA – primary organic aerosol (e–h), SIA – secondary inorganic aerosol (i–l), SOA – secondary organic aerosol (m–p).

**Table S1.** Rural, urban and suburban background stations used to validate the concentrations of PM<sub>2.5</sub>, NO<sub>2</sub>, and SO<sub>2</sub>.

| Pollutant         | Station area       | European codes of stations <sup>1</sup>                                                                                                                                                                                                                                                                                                                                                                                                                                                                                                                                                                                                                                                                                                                                                                                                                                                                                                                                                                                                                                                                                                                                                                                                                                                                                                                                                                                                                                                                                                                                                                                                                                                                                                                                                                                                                                                                                                                                                                                                                                                                                                                                                                                                                                                                                                                                                                                                                                                                                                                                                                                                                                                                                                                                                                                                                                                                                                                                                                                                                                                                                                                                                                                                                                                                                                                                                                                                                                                                                                                  |
|-------------------|--------------------|----------------------------------------------------------------------------------------------------------------------------------------------------------------------------------------------------------------------------------------------------------------------------------------------------------------------------------------------------------------------------------------------------------------------------------------------------------------------------------------------------------------------------------------------------------------------------------------------------------------------------------------------------------------------------------------------------------------------------------------------------------------------------------------------------------------------------------------------------------------------------------------------------------------------------------------------------------------------------------------------------------------------------------------------------------------------------------------------------------------------------------------------------------------------------------------------------------------------------------------------------------------------------------------------------------------------------------------------------------------------------------------------------------------------------------------------------------------------------------------------------------------------------------------------------------------------------------------------------------------------------------------------------------------------------------------------------------------------------------------------------------------------------------------------------------------------------------------------------------------------------------------------------------------------------------------------------------------------------------------------------------------------------------------------------------------------------------------------------------------------------------------------------------------------------------------------------------------------------------------------------------------------------------------------------------------------------------------------------------------------------------------------------------------------------------------------------------------------------------------------------------------------------------------------------------------------------------------------------------------------------------------------------------------------------------------------------------------------------------------------------------------------------------------------------------------------------------------------------------------------------------------------------------------------------------------------------------------------------------------------------------------------------------------------------------------------------------------------------------------------------------------------------------------------------------------------------------------------------------------------------------------------------------------------------------------------------------------------------------------------------------------------------------------------------------------------------------------------------------------------------------------------------------------------------------|
| PM <sub>2.5</sub> | Rural              | AT30407, AT31902, AT0ENK1, AT0ILL1, CZ0ZTNV, CZ0PKUJ, CZ0UTUS, CZ0ULOM, CZ0TVER, CZ0JKOS, CZ0TSTD, CZ0BMIS, CZ0MBEL, DEBY004, DEBY049, DENW068, DEBY072, DEBB053, DEBB065, DEBY013, DEMV012, DEMV024, DESH056, DEBY109, DEMV004, DETH061, DENI060, DEHE066, DEHE046, DERP028, DERP017, DEST104, DEBY124, DEST098, DENI031, DEUB005, DESH008, HU0040A, PL0243A, PL0505A, PL0077A, PL0243A, PL0005R, SK0007R, SK0406A                                                                                                                                                                                                                                                                                                                                                                                                                                                                                                                                                                                                                                                                                                                                                                                                                                                                                                                                                                                                                                                                                                                                                                                                                                                                                                                                                                                                                                                                                                                                                                                                                                                                                                                                                                                                                                                                                                                                                                                                                                                                                                                                                                                                                                                                                                                                                                                                                                                                                                                                                                                                                                                                                                                                                                                                                                                                                                                                                                                                                                                                                                                                      |
|                   | Urban and suburban | AT32701, AT4S156, AT4S404, AT10001, AT4S125, AT4S416, AT60197, AT9STAD, AT32301, AT4S407, AT4S409, AT60178, AT2KA71, AT60107, AT4S184, AT4S406, AT9LOB, CZ0LILL, CZ0TOVK, CZ0MPRR, CZ0BBDN, CZ0TFMI, CZ0ZVMZ, CZ0EMTP, CZ0THAR, CZ0TKAR, CZ0BBNI, CZ0TCTN, CZ0PPLV, CZ0SMBO, CZ0UDCM, CZ0ZJHJ, CZ0BBNY, CZ0EPAU, CZ0SKLM, CZ0TTRR, CZ0CCBD, CZ0TOZR, CZ0ZLLN, CZ0ALIB, CZ0UTPM, CZ0KSOM, CZ0UULK, CZ0UOMOM, CZ0ARIE, CZ0ASTO, CZ0MOLL, CZ0PPLL, CZ0TRYC, CZ0TRK, DEBY187, DEBY058, DEST002, DEBY067, DEBB083, DEBY002, DEHH059, DEBB089, DENW024, DEBY039, DEMV021, DEBY012, DEST044, DENW179, DESH023, DEBY075, DESL012, DENW030, DEBY077, DERP053, DEBB067, DEBB092, DEBY118, DEBY099, DERP019, DENI054, DEHB002, DEBY052, DEBY088, DESH058, DEHE018, DEBB048, DEBB075, DEHH033, DEHE135, DENI016, DETH093, DEBB063, DENW114, DEHE022, DEMV028, DEST050, DEBB086, DENW008, DESH015, DEBY005, DEBY007, DENI041, DEBY031, DENW010, DETH036, DERP022, DENW247, DEBB007, DEST077, DEBY009, DEBB021, DEHH008, DERP009, DENW002, DENI042, DENI049, DENI038, DEHB005, DETH020, DENW022, DENW021, DENI043, DEBB064, HU0057A, HU0039A, HU0056A, HU0023A, HU0022A, HU0026A, HU0029A, HU0034A, PL0148A, PL0565A, PL0594A, PL0218A, PL0538A, PL0052A, PL0115A, PL0138A, PL0213A, PL0096A, PL0129A, PL0143A, PL0071A, PL0194A, PL0501A, PL0141A, PL0585A, PL0507A, PL0144A, PL0136A, PL0008A, PL0134A, PL0248A, PL0175A, PL0539A, PL0543A, PL0673A, PL0677A, PL0678A, PL0308A, PL0079A, PL0085A, PL0248A, PL0502A, PL0492A, PL0071A, PL0549A, PL0550A, PL0295A, PL0517A, PL0498A, PL0494A, PL0198A, PL0535A, PL0238A, PL0091A, PL0091A, PL0008A, PL0496A, PL0495A, PL0143A, PL0276A, PL0413A, PL0503A, PL0534A, PL0501A, PL0096A, PL0100A, PL0552A, PL0499A, PL0491A, PL0527A, PL0175A, PL0523A, PL0566A, PL0500A, PL0490A, PL0497A, PL0398A, PL0151A, PL0192A, PL0493A, PL0213A, PL0141A, PL0624A, PL0591A, PL0518A, PL0542A, PL0530A, PL0171A, PL0509A, PL0653A, PL0682A, PL0684A, PL0690A, PL0245A, PL0704A, SK0008A, SK0263A, SK0050A, SK0020A, SK0264A, SK0031A, SK0030A, SK0268A, SK0037A, SK0027A, SK0025A, SK0134A, SK0013A, SK0262A, SK0022A, SK0001A, SK0004A, SK0048A                                                                                                                                                                                                                                                                                                                                                                                                                                                                                                                                                                                                                                                                                                                                                                                                                                                                                                                                                                                                                                                                                                                                                                                                                                                                                                                                                                                    |
| NO <sub>2</sub>   | Rural              | AT2WO35, AT72538, AT30302, AT30403, AT53055, AT10002, AT31904, AT30202, AT30502, AT32604, AT31701, AT31703, AT2SP10, AT31902, AT0ILL1, AT0PILL1, AT60151, AT31204, AT0ENK1, AT0KLLH, AT30407, CZ0JKOS, CZ0BMIS, CZ0MJES, CZ0TSTD, CZ0TVER, CZ0UTUS, CZ0TCER, CZ0ZTNV, CZ0UDOK, CZ0HPLO, CZ0PKUJ, CZ0USNZ, CZ0ULOM, DENI031, DEHE046, DEBB053, DEHE039, DEUB028, DENI063, DEBY196, DENW064, DERP013, DEHE024, DEHE050, DEBE032, DERP014, DEBE051, DEBE056, DEST089, DESN093, DESN051, DESN074, DESN076, DESH008, DEMV004, DEHE060, DEHE026, DEHE043, DEHE028, DEMV026, DEMV012, DERP028, DEBY013, DEBY049, DEBY004, DEUB005, DEUB030, DEMV017, DETH061, DENW081, DETH042, DENW068, DESL019, DEBY109, DESN079, DERP016, DENI077, DEBB066, DETH026, DEMV024, DENW065, DEBE062, DENW066, DEBB065, DEUB001, DEBE027, DEHE042, DERP017, DENI059, DENI060, DEBY124, DEBW087, DEST098, DEBY072, DEST104, DERP015, DEBW004, HU0040A, HU0040A, PL0128A, PL0182A, PL0094A, PL0243A, PL0068A, PL0121A, PL0247A, PL0105A, PL0014A, PL0150A, PL0077A, PL0505A, PL0622A, PL0211A, PL0005R, PL0691A, SK0007R, SK0006R, SK0041A                                                                                                                                                                                                                                                                                                                                                                                                                                                                                                                                                                                                                                                                                                                                                                                                                                                                                                                                                                                                                                                                                                                                                                                                                                                                                                                                                                                                                                                                                                                                                                                                                                                                                                                                                                                                                                                                                                                                                                                                                                                                                                                                                                                                                                                                                                                                                                                                                                           |
|                   | Urban and suburban | AT10003, AT32301, AT32501, AT30601, AT60170, AT80807, AT30401, AT900ZA, AT30201, AT30301, AT32701, AT4S125, AT60177, AT56072, AT60178, AT4S406, AT4S409, AT9STEF, AT4S416, AT30065, AT30101, AT60172, AT60179, AT72113, AT31901, AT9SCHA, AT4S184, AT9STAD, AT2SP18, AT60119, AT4S407, AT9LOB, AT60145, AT31401, AT60118, AT51200, AT60138, AT60139, AT60141, AT60106, AT60107, AT9JAE, AT60114, AT60180, AT60198, AT60197, AT60194, AT60195, AT4S156, AT10001, AT2KA71, AT4S404, AT32401, AT72912, CZ0CPRA, CZ0TOVK, CZ0PPLV, CZ0CCBD, CZ0TKAR, CZ0TFMI, CZ0TCTN, CZ0TOFF, CZ0ZLLN, CZ0AKOB, CZ0ALIB, CZ0ARIE, CZ0KSOM, CZ0UDCM, CZ0UULK, CZ0UOMOM, CZ0MOLL, CZ0ZLLN, CZ0LILL, CZ0TOPO, CZ0EMTP, CZ0ABRE, CZ0BBDN, CZ0TRK, CZ0BBNY, CZ0UULM, CZ0SKLS, CZ0SMBO, CZ0EPAO, CZ0PPLV, CZ0TRYC, CZ0ARIE, CZ0SPBR, DENW247, DEBW023, DESL013, DEBW033, DEBY052, DEBB021, DEHB001, DERP021, DENI054, DEHE045, DEBB092, DESH023, DEBW039, DENI038, DENW010, DEBB067, DEBB063, DENW114, DEHH047, DEHH050, DEBE018, DEHH079, DEHH081, DERP009, DENW022, DEBY032, DEBW019, DEHE001, DEBW076, DENI020, DEST011, DENI042, DEBY058, DEBY089, DESN092, DEBW029, DEBY113, DEMV021, DENW095, DESN004, DENW030, DENW029, DENW038, DEBW098, DENW009, DEBW010, DENW006, DEBY068, DENW067, DEBW073, DESH035, DEBE034, DETH020, DEHE134, DEHE005, DESN104, DETH117, DEBW052, DEBB064, DESL010, DEMV007, DEBY088, DEBY039, DEBE066, DESL011, DEHE020, DEBW107, DESH057, DETH041, DENI028, DEHE028, DETH095, DENW381, DERP025, DEBW059, DETH013, DEBY075, DENI029, DENW382, DENW002, DEHE044, DESH058, DENW079, DENW080, DEBB048, DEMV019, DENW096, DEBY030, DEHH008, DEHE135, DEHB002, DEBW013, DEBY189, DEHE018, DEHE013, DEBB007, DENI016, DEBY007, DENI041, DEST002, DENW094, DERP053, DENI062, DEST105, DEBB075, DEBY005, DEBE010, DENW024, DEBW024, DEBB055, DEHE030, DEBE051, DEST029, DENW062, DEBW046, DENW011, DEST066, DEBY012, DESN001, DESL012, DENW078, DEHH059, DESN059, DENW179, DENW071, DEHE032, DEST044, DESL017, DEBW042, DEHE022, DEBY099, DEBW027, DEHB005, DEBW015, DESN019, DERP001, DETH009, DEBY079, DEBW112, DEBW081, DEBY009, DETH018, DERP007, DEST077, DERP022, DENW059, DEHH033, DEBW038, DENI011, DETH036, DEBY020, DENI024, DENI052, DEBW084, DETH005, DEST050, DENW008, DERP060, DEBE068, DESN045, DENI043, DEBY031, DEHB004, DEBY118, DEHE011, DEBB086, DERP019, DEBY187, DEHB012, DETH093, DEBB083, DENW053, DEBY067, DETH011, DEBY188, HU0037A, HU0029A, HU0032A, HU0035A, HU0025A, HU0036A, HU0042A, HU0039A, HU0026A, HU0022A, HU0057A, HU0034A, HU0038A, HU0023A, PL0209A, PL0552A, PL0568A, PL0190A, PL0594A, PL0520A, PL0468A, PL0520A, PL0187A, PL0171A, PL0213A, PL0518A, PL0317A, PL0138A, PL0129A, PL0031A, PL0504A, PL0273A, PL0509A, PL0096A, PL0502A, PL0558A, PL0237A, PL0050A, PL0049A, PL0239A, PL0240A, PL0573A, PL0507A, PL0244A, PL0245A, PL0238A, PL0398A, PL0241A, PL0148A, PL0295A, PL0321A, PL0052A, PL0529A, PL0543A, PL0066A, PL0143A, PL0312A, PL0134A, PL0136A, PL0582A, PL0503A, PL0194A, PL0141A, PL0048A, PL0008A, PL0550A, PL0591A, PL0184A, PL0501A, PL0091A, PL0495A, PL0115A, PL0559A, PL0560A, PL0192A, PL0581A, PL0047A, PL0175A, PL0045A, PL0046A, PL0236A, PL0242A, PL0151A, PL0222A, PL0618A, PL0212A, PL0198A, PL0544A, PL0193A, PL0585A, PL0575A, PL0294A, PL0276A, PL0248A, PL0218A, PL0563A, PL0079A, PL0494A, PL0539A, PL0640A, PL0657A, PL0673A, PL0675A, PL0677A, PL0681A, PL0682A, PL0310A, PL0698A, PL0700A, SK0263A, SK0048A, SK0134A, SK0001A, SK0020A, SK0008A, SK0025A, SK0037A, SK0050A |
| SO <sub>2</sub>   | Rural              | AT30801, AT2WO35, AT30302, AT30103, AT30202, AT60190, AT0PILL1, AT60185, AT60151, AT0ENK1, AT0ILL1, AT30407, AT31701, AT31902, AT31904, AT31703, AT30502, CZ0PKUJ, CZ0ZTNV, CZ0LFRF, CZ0USNZ, CZ0ULOM, CZ0JKOS, CZ0BMIS, CZ0MJES, CZ0TSTD, CZ0TVER, CZ0UKRU, CZ0UTUS, CZ0UDOK, DEST089, DETH042, DERP015, DERP016, DESL001, DEMV026, DEHE060, DEBB066, DESN074, DEMV012, DEMV004, DEUB030, DEUB028, DENI058, DETH061, DERP013, DEUB005, DEBW004, DEUB001, DERP014, DEST098, DESL019, DERP017, DEHE042, HU0040A, PL0077A, PL0211A, PL0505A, PL0247A, PL0014A, PL0121A, PL0182A, PL0443A, PL0128A, PL0068A, PL0094A, PL0243A, PL0105A, PL0150A, PL0622A, PL0005R, PL0649A, PL0691A, SK0007R                                                                                                                                                                                                                                                                                                                                                                                                                                                                                                                                                                                                                                                                                                                                                                                                                                                                                                                                                                                                                                                                                                                                                                                                                                                                                                                                                                                                                                                                                                                                                                                                                                                                                                                                                                                                                                                                                                                                                                                                                                                                                                                                                                                                                                                                                                                                                                                                                                                                                                                                                                                                                                                                                                                                                                                                                                                                |
|                   | Urban and suburban | AT32301, AT32501, AT30601, AT60170, AT900ZA, AT30301, AT30201, AT60177, AT4S406, AT4S409, AT4S416, AT30401, AT31401, AT2KA71, AT60179, AT31901, AT9SCHA, AT9STAD, AT9STEF, AT60119, AT51200, AT31301, AT60138, AT60106, AT60180, AT32401, AT4S156, AT10001, AT10003, CZ0LILL, CZ0ULTT, CZ0TOPO, CZ0CCBD, CZ0UULM, CZ0ZJHJ, CZ0EPAU, CZ0SKLS, CZ0EPAO, CZ0PPLV, CZ0BBNY, CZ0PPLV, CZ0MPRR, CZ0TKAR, CZ0TCTN, CZ0TOFF, CZ0ZLLN, CZ0ALIB, CZ0ARIE, CZ0UTPM, CZ0KSOM, CZ0UULK, CZ0TRYC, DEBW029, DESL017, DERP025, DENW002, DERP022, DENI020, DEHH081, DESN092, DEHB004, DEMV007, DEHB012, DENW040, DEHB002, DESN045, DESH035, DERP009, DENW024, DEHH079, DEBE066, DEHE005, DESL002, DERP021, DERP019, DEST028, DEST077, DETH009, DEHE020, DENI043, DENI042, DEHE135, DEHB001, DEHE011, DEHE013, DEMV019, DERP007, DEHH008, DEST011, DEMV021, DEHE018, DENI038, DESL012, DERP001, DEHE022, DESN001, DEHE001, DEHH059, DETH020, DESN024, DEHB005, DEBB064, DEBB021, DESL006, HU0023A, HU0057A, HU0026A, HU0038A, HU0029A, HU0036A, HU0025A, HU0042A, HU0037A, HU0022A, HU0039A, HU0035A, HU0034A, HU0032A, PL0468A, PL0143A, PL0236A, PL0503A, PL0242A, PL0031A, PL0049A, PL0050A, PL0048A, PL0398A, PL0245A, PL0582A, PL0273A, PL0504A, PL0321A, PL0218A, PL0520A, PL0194A, PL0495A, PL0008A, PL0507A, PL0136A, PL0501A, PL0552A, PL0509A, PL0565A, PL0312A, PL0591A, PL0568A, PL0237A, PL0581A, PL0317A, PL0045A, PL0129A, PL0563A, PL0594A, PL0184A, PL0550A, PL0192A, PL0295A, PL0518A, PL0190A, PL0115A, PL0138A, PL0175A, PL0096A, PL0091A, PL0238A, PL0209A, PL0047A, PL0573A, PL0276A, PL0241A, PL0234A, PL0529A, PL0151A, PL0046A, PL0558A, PL0187A, PL0502A, PL0171A, PL0244A, PL0212A, PL0543A, PL0239A, PL0240A, PL0052A, PL0213A, PL0079A, PL0585A, PL0198A, PL0148A, PL0222A, PL0544A, PL0294A, PL0494A, PL0539A, PL0671A, PL0673A, PL0675A, PL0677A, PL0681A, PL0682A, PL0684A, PL0698A, PL0700A, SK0013A, SK0030A, SK0013A, SK0008A, SK0001A, SK0050A, SK0027A                                                                                                                                                                                                                                                                                                                                                                                                                                                                                                                                                                                                                                                                                                                                                                                                                                                                                                                                                                                                                                                                                                                                                                                                                                                                                                                                                                                                                                                                                                                                                                                |

<sup>1</sup> Detailed information about individual stations can be found in the AirBase database based on these codes.

**Table S2.** Rural background stations used to validate the concentrations of individual PM<sub>2.5</sub> components. Symbols ✓ indicate which components were measured at the individual stations.

| Database | Station code | EMEP's member | Station name | Country  | Longitude | Latitude | PNH <sub>4</sub> | PNO <sub>3</sub> | PSO <sub>4</sub> | EC | OC |
|----------|--------------|---------------|--------------|----------|-----------|----------|------------------|------------------|------------------|----|----|
| AirBase  | AT0002R      | Yes           | Illmitz      | Austria  | 47.77     | 16.7664  | ✓                | ✓                | ✓                |    |    |
| EBAS     | CZ0003R      | Yes           | Košetice     | Czechia  | 49.5734   | 15.0803  | ✓                | ✓                | ✓                | ✓  | ✓  |
| EBAS     | DE0004R      | Yes           | Melpitz      | Germany  | 51.5255   | 12.9277  | ✓                | ✓                | ✓                | ✓  | ✓  |
| EBAS     | HU0002R      | Yes           | K-puszt      | Hungary  | 46.9667   | 19.5833  | ✓                | ✓                | ✓                |    |    |
| EBAS     | PL0002R      | Yes           | Jarczew      | Poland   | 51.8144   | 21.9724  | ✓                | ✓                | ✓                |    |    |
| EBAS     | PL0004R      | Yes           | Leba         | Poland   | 54.7539   | 17.5343  | ✓                | ✓                | ✓                |    |    |
| EBAS     | PL0005R      | Yes           | Diabla Gora  | Poland   | 54.15     | 22.0667  | ✓                | ✓                | ✓                | ✓  | ✓  |
| EBAS     | PL0009R      | Yes           | Zielonka     | Poland   | 53.6621   | 17.934   | ✓                | ✓                | ✓                | ✓  | ✓  |
| AirBase  | PL0505A      | No            | Osiecznica   | Poland   | 51.3176   | 15.4317  | ✓                | ✓                | ✓                | ✓  | ✓  |
| EBAS     | SK0006R      | Yes           | Starina      | Slovakia | 49.05     | 22.2667  | ✓                | ✓                | ✓                |    |    |

**Table S3.** Urban and suburban background stations used to validate the concentrations of PM<sub>2.5</sub>, NO<sub>2</sub>, and SO<sub>2</sub> in individual cities.

| Pollutant         | City     | European codes of stations <sup>1</sup>              |
|-------------------|----------|------------------------------------------------------|
| PM <sub>2.5</sub> | Berlin   | DEBE010, DEBE034, DEBE068                            |
|                   | Munich   | DEBY039, DEBY089                                     |
|                   | Vienna   | AT9STAD, AT90LOB                                     |
|                   | Budapest | HU0022A                                              |
|                   | Warsaw   | PL0143A, PL0141A                                     |
|                   | Prague   | CZ0ALIB, CZ0ARIE, CZ0ASTO                            |
| NO <sub>2</sub>   | Berlin   | DEBE018, DEBE034, DEBE066, DEBE010, DEBE051, DEBE068 |
|                   | Munich   | DEBY089, DEBY039, DEBY189                            |
|                   | Vienna   | AT900ZA, AT9STEF, AT9SCHA, AT9STAD, AT90LOB, AT9JAEG |
|                   | Budapest | HU0036A, HU0042A, HU0022A                            |
|                   | Warsaw   | PL0143A, PL0141A, PL0673A                            |
|                   | Prague   | CZ0AKOB, CZ0ALIB, CZ0ARIE, CZ0ABRE, CZ0ACHO          |
| SO <sub>2</sub>   | Vienna   | AT900ZA, AT9SCHA, AT9STAD, AT9STEF                   |
|                   | Budapest | HU0036A, HU0042A, HU0022A                            |
|                   | Warsaw   | PL0673A                                              |

<sup>1</sup> Detailed information about the individual stations can be found in the AirBase database based on these codes.

**Table S4.** Prague synoptic stations used to validate temperature and wind speed.

| Station name  | Longitude | Latitude |
|---------------|-----------|----------|
| Praha–Karlovy | 14.4276   | 50.0691  |
| Praha–Kbely   | 14.538    | 50.1232  |
| Praha–Libuš   | 14.4467   | 50.0077  |
| Praha–Ruzyně  | 14.2555   | 50.1003  |

**Table S5.** Comparison of the seasonal averages of the average daily absolute (relative) impacts/contributions<sup>1</sup> of individual categories<sup>2</sup> on/to PM<sub>2.5</sub> concentration in  $\mu\text{g m}^{-3}$  (in %) calculated from the SOAP and VBS/PSAT experiments for Berlin. While the highest averages within each season are shown in red for each experiment, the second and third highest averages are shown in blue. The seasonal relative averages greater than or equal to 5 % are shown in bold. The last row shows the sum of the seasonal averages.

| Berlin<br>Category | Seasonal avrg. of the avrg. daily abs. imp./contrib. <sup>1</sup><br>of the given cat. <sup>2</sup> on/to PM <sub>2.5</sub> ( $\mu\text{g m}^{-3}$ ) |             |             |              |             |             | Seasonal avrg. of the avrg. daily relat. imp./contrib. <sup>1</sup><br>of the given cat. <sup>2</sup> on/to PM <sub>2.5</sub> (%) |             |             |              |             |             |
|--------------------|------------------------------------------------------------------------------------------------------------------------------------------------------|-------------|-------------|--------------|-------------|-------------|-----------------------------------------------------------------------------------------------------------------------------------|-------------|-------------|--------------|-------------|-------------|
|                    | Winter (DJF)                                                                                                                                         |             |             | Summer (JJA) |             |             | Winter (DJF)                                                                                                                      |             |             | Summer (JJA) |             |             |
|                    | SOAP                                                                                                                                                 | VBS         | PSAT        | SOAP         | VBS         | PSAT        | SOAP                                                                                                                              | VBS         | PSAT        | SOAP         | VBS         | PSAT        |
| GNFR A             | 0.44                                                                                                                                                 | 0.43        | 0.52        | 0.21         | 0.26        | 0.16        | 3.7                                                                                                                               | 3.3         | 4.3         | <b>7.1</b>   | <b>6.5</b>  | <b>5.3</b>  |
| GNFR B             | 1.04                                                                                                                                                 | 1.05        | 1.03        | <b>0.55</b>  | <b>0.59</b> | <b>0.47</b> | <b>10.3</b>                                                                                                                       | <b>9.6</b>  | <b>9.8</b>  | <b>19.9</b>  | <b>16.0</b> | <b>17.1</b> |
| GNFR C             | <b>2.06</b>                                                                                                                                          | <b>2.38</b> | <b>1.96</b> | 0.14         | 0.16        | 0.12        | <b>17.0</b>                                                                                                                       | <b>17.7</b> | <b>16.1</b> | 4.9          | 4.2         | 4.1         |
| GNFR D             | 0.01                                                                                                                                                 | 0.02        | 0.01        | 0.0          | 0.0         | 0.0         | 0.1                                                                                                                               | 0.1         | 0.1         | 0.1          | 0.1         | 0.1         |
| GNFR E             | 0.36                                                                                                                                                 | 0.37        | 0.27        | 0.21         | 0.25        | 0.20        | 3.6                                                                                                                               | 3.4         | 2.9         | <b>7.7</b>   | <b>6.8</b>  | <b>7.2</b>  |
| GNFR F             | <b>1.81</b>                                                                                                                                          | <b>2.39</b> | <b>1.71</b> | <b>0.44</b>  | <b>1.06</b> | <b>0.32</b> | <b>15.3</b>                                                                                                                       | <b>19.4</b> | <b>14.3</b> | <b>15.7</b>  | <b>28.1</b> | <b>11.4</b> |
| GNFR G             | 0.41                                                                                                                                                 | 0.41        | 0.4         | 0.13         | 0.17        | 0.08        | 4.1                                                                                                                               | 3.9         | 4.0         | <b>5.0</b>   | <b>5.5</b>  | 3.0         |
| GNFR H             | 0.0                                                                                                                                                  | 0.0         | 0.0         | 0.0          | 0.0         | 0.0         | 0.0                                                                                                                               | 0.0         | 0.0         | 0.0          | 0.0         | 0.0         |
| GNFR I             | 0.46                                                                                                                                                 | 0.47        | 0.49        | 0.20         | 0.28        | 0.16        | 4.1                                                                                                                               | 3.9         | 4.4         | <b>7.6</b>   | <b>7.7</b>  | <b>6.2</b>  |
| GNFR J             | 0.35                                                                                                                                                 | 0.39        | 0.32        | 0.21         | 0.23        | 0.19        | 4.0                                                                                                                               | 4.0         | 3.5         | <b>8.1</b>   | <b>6.5</b>  | <b>7.3</b>  |
| GNFR K             | <b>3.05</b>                                                                                                                                          | <b>3.06</b> | 0.84        | <b>0.36</b>  | <b>0.37</b> | 0.14        | <b>34.1</b>                                                                                                                       | <b>31.8</b> | <b>8.7</b>  | <b>13.9</b>  | <b>11.3</b> | <b>5.2</b>  |
| GNFR L             | 1.33                                                                                                                                                 | 1.34        | 0.66        | 0.17         | 0.18        | 0.07        | <b>10.3</b>                                                                                                                       | <b>9.7</b>  | 4.7         | <b>6.4</b>   | <b>5.0</b>  | 2.5         |
| BIO                | -                                                                                                                                                    | -           | 0.09        | -            | -           | <b>0.56</b> | -                                                                                                                                 | -           | 0.9         | -            | -           | <b>20.3</b> |
| IC                 | -                                                                                                                                                    | -           | 0.0         | -            | -           | 0.0         | -                                                                                                                                 | -           | 0.0         | -            | -           | 0.0         |
| BC                 | -                                                                                                                                                    | -           | <b>2.35</b> | -            | -           | 0.24        | -                                                                                                                                 | -           | <b>26.2</b> | -            | -           | <b>10.1</b> |
| $\Sigma$           | 11.32                                                                                                                                                | 12.31       | 10.65       | 2.62         | 3.55        | 2.71        | 106.6                                                                                                                             | 106.8       | 99.9        | 96.4         | 97.7        | 99.8        |

<sup>1</sup> While the impacts (imp.) are connected with the SOAP and VBS experiments, the contributions (contrib.) are connected with the PSAT experiment.

<sup>2</sup> The categories (cat.) considered in the SOAP and VBS experiments are GNFR sectors A–L; the categories considered in the PSAT experiment are GNFR sectors A–L, BIO – biogenic emissions, IC – initial condition, and BC – boundary conditions.

**Table S6.** Same as Table S5 but for Munich.

| Munich<br>Category | Seasonal avrg. of the avrg. daily abs. imp./contrib. <sup>1</sup><br>of the given cat. <sup>2</sup> on/to PM <sub>2.5</sub> (µg m <sup>-3</sup> ) |             |             |              |             |             | Seasonal avrg. of the avrg. daily relat. imp./contrib. <sup>1</sup><br>of the given cat. <sup>2</sup> on/to PM <sub>2.5</sub> (%) |             |             |              |             |             |
|--------------------|---------------------------------------------------------------------------------------------------------------------------------------------------|-------------|-------------|--------------|-------------|-------------|-----------------------------------------------------------------------------------------------------------------------------------|-------------|-------------|--------------|-------------|-------------|
|                    | Winter (DJF)                                                                                                                                      |             |             | Summer (JJA) |             |             | Winter (DJF)                                                                                                                      |             |             | Summer (JJA) |             |             |
|                    | SOAP                                                                                                                                              | VBS         | PSAT        | SOAP         | VBS         | PSAT        | SOAP                                                                                                                              | VBS         | PSAT        | SOAP         | VBS         | PSAT        |
|                    | GNFR A                                                                                                                                            | 0.45        | 0.44        | 0.52         | 0.44        | 0.48        | 0.31                                                                                                                              | 3.2         | 2.8         | 3.7          | <b>8.6</b>  | <b>7.7</b>  |
| GNFR B             | 0.98                                                                                                                                              | 0.98        | 1.00        | <b>0.87</b>  | <b>0.92</b> | <b>0.70</b> | <b>8.8</b>                                                                                                                        | <b>8.0</b>  | <b>8.8</b>  | <b>18.8</b>  | <b>15.7</b> | <b>15.4</b> |
| GNFR C             | <b>2.13</b>                                                                                                                                       | <b>2.55</b> | <b>2.02</b> | 0.26         | 0.31        | 0.21        | <b>18.7</b>                                                                                                                       | <b>19.6</b> | <b>17.5</b> | <b>6.2</b>   | <b>5.7</b>  | <b>5.1</b>  |
| GNFR D             | 0.01                                                                                                                                              | 0.01        | 0.0         | 0.0          | 0.0         | 0.0         | 0.1                                                                                                                               | 0.1         | 0.0         | 0.1          | 0.0         | 0.1         |
| GNFR E             | 0.45                                                                                                                                              | 0.47        | 0.31        | 0.30         | 0.38        | 0.28        | 4.1                                                                                                                               | 3.8         | 3.1         | <b>7.3</b>   | <b>6.8</b>  | <b>6.9</b>  |
| GNFR F             | <b>2.21</b>                                                                                                                                       | <b>2.99</b> | <b>2.11</b> | <b>1.06</b>  | <b>2.13</b> | <b>0.74</b> | <b>17.7</b>                                                                                                                       | <b>22.6</b> | <b>16.7</b> | <b>23.6</b>  | <b>38.5</b> | <b>16.5</b> |
| GNFR G             | 0.13                                                                                                                                              | 0.13        | 0.14        | 0.05         | 0.06        | 0.03        | 1.1                                                                                                                               | 1.0         | 1.2         | 1.0          | 1.1         | 0.6         |
| GNFR H             | 0.0                                                                                                                                               | 0.0         | 0.0         | 0.0          | 0.0         | 0.0         | 0.0                                                                                                                               | 0.0         | 0.0         | 0.0          | 0.0         | 0.0         |
| GNFR I             | 0.43                                                                                                                                              | 0.46        | 0.45        | 0.32         | 0.41        | 0.25        | 3.7                                                                                                                               | 3.5         | 3.9         | <b>7.5</b>   | <b>7.5</b>  | <b>5.9</b>  |
| GNFR J             | 0.34                                                                                                                                              | 0.40        | 0.32        | 0.29         | 0.31        | 0.26        | 3.7                                                                                                                               | 3.8         | 3.4         | <b>7.3</b>   | <b>6.1</b>  | <b>6.6</b>  |
| GNFR K             | <b>3.10</b>                                                                                                                                       | <b>3.12</b> | 1.00        | <b>0.70</b>  | <b>0.72</b> | 0.34        | <b>33.4</b>                                                                                                                       | <b>30.8</b> | <b>9.6</b>  | <b>15.2</b>  | <b>12.3</b> | <b>7.0</b>  |
| GNFR L             | 0.87                                                                                                                                              | 0.87        | 0.68        | 0.17         | 0.18        | 0.11        | <b>5.8</b>                                                                                                                        | <b>5.3</b>  | 4.3         | 3.9          | 3.1         | 2.2         |
| BIO                | -                                                                                                                                                 | -           | 0.09        | -            | -           | <b>0.88</b> | -                                                                                                                                 | -           | 1.1         | -            | -           | <b>20.8</b> |
| IC                 | -                                                                                                                                                 | -           | 0.0         | -            | -           | 0.0         | -                                                                                                                                 | -           | 0.0         | -            | -           | 0.0         |
| BC                 | -                                                                                                                                                 | -           | <b>2.50</b> | -            | -           | 0.28        | -                                                                                                                                 | -           | <b>26.5</b> | -            | -           | <b>6.6</b>  |
| ∑                  | 11.10                                                                                                                                             | 12.42       | 11.14       | 4.46         | 5.90        | 4.39        | 100.3                                                                                                                             | 101.3       | 99.8        | 99.5         | 104.5       | 99.7        |

<sup>1</sup> While the impacts (imp.) are connected with the SOAP and VBS experiments, the contributions (contrib.) are connected with the PSAT experiment.

<sup>2</sup> The categories (cat.) considered in the SOAP and VBS experiments are GNFR sectors A–L; the categories considered in the PSAT experiment are GNFR sectors A–L, BIO – biogenic emissions, IC – initial condition, and BC – boundary conditions.

**Table S7.** Same as Table S5 but for Budapest.

| Budapest<br>Category | Seasonal avrg. of the avrg. daily abs. imp./contrib. <sup>1</sup><br>of the given cat. <sup>2</sup> on/to PM <sub>2.5</sub> (µg m <sup>-3</sup> ) |              |             |              |             |             | Seasonal avrg. of the avrg. daily relat. imp./contrib. <sup>1</sup><br>of the given cat. <sup>2</sup> on/to PM <sub>2.5</sub> (%) |             |             |              |             |             |
|----------------------|---------------------------------------------------------------------------------------------------------------------------------------------------|--------------|-------------|--------------|-------------|-------------|-----------------------------------------------------------------------------------------------------------------------------------|-------------|-------------|--------------|-------------|-------------|
|                      | Winter (DJF)                                                                                                                                      |              |             | Summer (JJA) |             |             | Winter (DJF)                                                                                                                      |             |             | Summer (JJA) |             |             |
|                      | SOAP                                                                                                                                              | VBS          | PSAT        | SOAP         | VBS         | PSAT        | SOAP                                                                                                                              | VBS         | PSAT        | SOAP         | VBS         | PSAT        |
|                      | GNFR A                                                                                                                                            | 0.28         | 0.27        | 0.31         | 0.12        | 0.14        | 0.09                                                                                                                              | 1.4         | 1.2         | 1.7          | 4.2         | 3.6         |
| GNFR B               | 0.91                                                                                                                                              | 0.92         | 0.91        | <b>0.42</b>  | <b>0.45</b> | <b>0.37</b> | <b>5.1</b>                                                                                                                        | 4.4         | <b>5.1</b>  | <b>14.5</b>  | <b>11.8</b> | <b>12.6</b> |
| GNFR C               | <b>9.18</b>                                                                                                                                       | <b>12.12</b> | <b>8.89</b> | <b>0.93</b>  | <b>1.03</b> | <b>0.87</b> | <b>52.7</b>                                                                                                                       | <b>56.9</b> | <b>50.8</b> | <b>30.8</b>  | <b>26.7</b> | <b>28.6</b> |
| GNFR D               | 0.01                                                                                                                                              | 0.01         | 0.0         | 0.0          | 0.0         | 0.0         | 0.1                                                                                                                               | 0.1         | 0.0         | 0.1          | 0.1         | 0.1         |
| GNFR E               | 0.19                                                                                                                                              | 0.25         | 0.13        | 0.10         | 0.15        | 0.10        | 1.1                                                                                                                               | 1.1         | 0.7         | 3.5          | 3.7         | 3.3         |
| GNFR F               | <b>2.17</b>                                                                                                                                       | <b>2.95</b>  | <b>1.94</b> | <b>0.39</b>  | <b>1.04</b> | 0.31        | <b>11.2</b>                                                                                                                       | <b>13.1</b> | <b>10.1</b> | <b>13.3</b>  | <b>27.1</b> | <b>10.6</b> |
| GNFR G               | 0.15                                                                                                                                              | 0.15         | 0.17        | 0.03         | 0.04        | 0.03        | 0.9                                                                                                                               | 0.8         | 1.0         | 1.0          | 1.2         | 0.9         |
| GNFR H               | 0.0                                                                                                                                               | 0.0          | 0.0         | 0.0          | 0.0         | 0.0         | 0.0                                                                                                                               | 0.0         | 0.0         | 0.0          | 0.0         | 0.0         |
| GNFR I               | 0.47                                                                                                                                              | 0.48         | 0.47        | 0.09         | 0.18        | 0.07        | 2.4                                                                                                                               | 2.0         | 2.4         | 3.0          | 4.7         | 2.4         |
| GNFR J               | 0.39                                                                                                                                              | 0.51         | 0.38        | 0.20         | 0.22        | 0.19        | 2.4                                                                                                                               | 2.5         | 2.3         | <b>6.8</b>   | <b>5.8</b>  | <b>6.4</b>  |
| GNFR K               | <b>2.85</b>                                                                                                                                       | <b>2.88</b>  | 0.92        | 0.10         | 0.11        | 0.10        | <b>17.4</b>                                                                                                                       | <b>15.0</b> | <b>5.3</b>  | 3.3          | 2.7         | 3.2         |
| GNFR L               | 1.38                                                                                                                                              | 1.39         | 0.62        | 0.04         | 0.05        | 0.04        | <b>7.7</b>                                                                                                                        | <b>6.8</b>  | 3.2         | 1.4          | 1.2         | 1.3         |
| BIO                  | -                                                                                                                                                 | -            | 0.10        | -            | -           | <b>0.73</b> | -                                                                                                                                 | -           | 0.6         | -            | -           | <b>24.4</b> |
| IC                   | -                                                                                                                                                 | -            | 0.0         | -            | -           | 0.0         | -                                                                                                                                 | -           | 0.0         | -            | -           | 0.0         |
| BC                   | -                                                                                                                                                 | -            | <b>2.52</b> | -            | -           | 0.08        | -                                                                                                                                 | -           | <b>16.6</b> | -            | -           | 2.9         |
| ∑                    | 17.98                                                                                                                                             | 21.93        | 17.36       | 2.42         | 3.41        | 2.98        | 102.4                                                                                                                             | 103.9       | 99.8        | 81.9         | 88.6        | 99.8        |

<sup>1</sup> While the impacts (imp.) are connected with the SOAP and VBS experiments, the contributions (contrib.) are connected with the PSAT experiment.

<sup>2</sup> The categories (cat.) considered in the SOAP and VBS experiments are GNFR sectors A–L; the categories considered in the PSAT experiment are GNFR sectors A–L, BIO – biogenic emissions, IC – initial condition, and BC – boundary conditions.

**Table S8.** Same as Table S5 but for Warsaw.

| Warsaw<br>Category | Seasonal avrg. of the avrg. daily abs. imp./contrib. <sup>1</sup><br>of the given cat. <sup>2</sup> on/to PM <sub>2.5</sub> (µg m <sup>-3</sup> ) |             |             |              |             |             | Seasonal avrg. of the avrg. daily relat. imp./contrib. <sup>1</sup><br>of the given cat. <sup>2</sup> on/to PM <sub>2.5</sub> (%) |             |             |              |             |             |
|--------------------|---------------------------------------------------------------------------------------------------------------------------------------------------|-------------|-------------|--------------|-------------|-------------|-----------------------------------------------------------------------------------------------------------------------------------|-------------|-------------|--------------|-------------|-------------|
|                    | Winter (DJF)                                                                                                                                      |             |             | Summer (JJA) |             |             | Winter (DJF)                                                                                                                      |             |             | Summer (JJA) |             |             |
|                    | SOAP                                                                                                                                              | VBS         | PSAT        | SOAP         | VBS         | PSAT        | SOAP                                                                                                                              | VBS         | PSAT        | SOAP         | VBS         | PSAT        |
|                    |                                                                                                                                                   |             |             |              |             |             |                                                                                                                                   |             |             |              |             |             |
| GNFR A             | 0.41                                                                                                                                              | 0.40        | 0.64        | 0.30         | 0.31        | 0.26        | 2.2                                                                                                                               | 1.9         | 3.2         | <b>8.1</b>   | <b>6.8</b>  | <b>6.9</b>  |
| GNFR B             | 1.78                                                                                                                                              | 1.82        | 1.84        | <b>1.08</b>  | <b>1.09</b> | <b>1.00</b> | <b>10.7</b>                                                                                                                       | <b>9.9</b>  | <b>10.7</b> | <b>32.4</b>  | <b>26.0</b> | <b>29.7</b> |
| GNFR C             | <b>6.62</b>                                                                                                                                       | <b>7.83</b> | <b>6.74</b> | 0.16         | 0.18        | 0.15        | <b>39.1</b>                                                                                                                       | <b>41.2</b> | <b>39.0</b> | 5.1          | 4.4         | 4.6         |
| GNFR D             | 0.03                                                                                                                                              | 0.04        | 0.01        | 0.01         | 0.01        | 0.01        | 0.2                                                                                                                               | 0.2         | 0.1         | 0.2          | 0.2         | 0.2         |
| GNFR E             | 0.16                                                                                                                                              | 0.18        | 0.08        | 0.07         | 0.10        | 0.07        | 0.8                                                                                                                               | 0.8         | 0.5         | 2.2          | 2.3         | 2.1         |
| GNFR F             | <b>1.83</b>                                                                                                                                       | <b>2.58</b> | <b>2.00</b> | <b>0.55</b>  | <b>1.21</b> | <b>0.43</b> | <b>10.5</b>                                                                                                                       | <b>13.6</b> | <b>11.0</b> | <b>16.0</b>  | <b>28.1</b> | <b>12.4</b> |
| GNFR G             | 0.19                                                                                                                                              | 0.19        | 0.23        | 0.04         | 0.07        | 0.03        | 1.3                                                                                                                               | 1.2         | 1.5         | 1.4          | 1.7         | 0.9         |
| GNFR H             | 0.0                                                                                                                                               | 0.0         | 0.0         | 0.0          | 0.0         | 0.0         | 0.0                                                                                                                               | 0.0         | 0.0         | 0.0          | 0.0         | 0.0         |
| GNFR I             | 0.46                                                                                                                                              | 0.49        | 0.58        | 0.22         | 0.30        | 0.18        | 2.8                                                                                                                               | 2.6         | 3.3         | <b>6.8</b>   | <b>7.2</b>  | <b>5.5</b>  |
| GNFR J             | 0.35                                                                                                                                              | 0.43        | 0.31        | 0.21         | 0.22        | 0.19        | 2.2                                                                                                                               | 2.3         | 1.9         | <b>6.6</b>   | <b>5.5</b>  | <b>6.0</b>  |
| GNFR K             | <b>3.53</b>                                                                                                                                       | <b>3.55</b> | 1.03        | <b>0.48</b>  | <b>0.49</b> | 0.20        | <b>23.1</b>                                                                                                                       | <b>21.1</b> | <b>6.5</b>  | <b>13.7</b>  | <b>11.3</b> | <b>5.7</b>  |
| GNFR L             | 1.63                                                                                                                                              | 1.64        | 0.72        | 0.17         | 0.17        | 0.08        | <b>7.9</b>                                                                                                                        | <b>7.3</b>  | 3.6         | 4.7          | 3.9         | 2.1         |
| BIO                | -                                                                                                                                                 | -           | 0.09        | -            | -           | <b>0.52</b> | -                                                                                                                                 | -           | 0.5         | -            | -           | <b>15.9</b> |
| IC                 | -                                                                                                                                                 | -           | 0.0         | -            | -           | 0.0         | -                                                                                                                                 | -           | 0.0         | -            | -           | 0.0         |
| BC                 | -                                                                                                                                                 | -           | <b>2.45</b> | -            | -           | 0.22        | -                                                                                                                                 | -           | <b>18.1</b> | -            | -           | <b>7.5</b>  |
| ∑                  | 16.99                                                                                                                                             | 19.15       | 16.72       | 3.29         | 4.15        | 3.34        | 100.8                                                                                                                             | 102.1       | 99.9        | 97.2         | 97.4        | 99.5        |

<sup>1</sup> While the impacts (imp.) are connected with the SOAP and VBS experiments, the contributions (contrib.) are connected with the PSAT experiment.

<sup>2</sup> The categories (cat.) considered in the SOAP and VBS experiments are GNFR sectors A–L; the categories considered in the PSAT experiment are GNFR sectors A–L, BIO – biogenic emissions, IC – initial condition, and BC – boundary conditions.

**Table S9.** Same as Table S5 but for Vienna.

| Vienna<br>Category | Seasonal avrg. of the avrg. daily abs. imp./contrib. <sup>1</sup><br>of the given cat. <sup>2</sup> on/to PM <sub>2.5</sub> (µg m <sup>-3</sup> ) |             |             |              |             |             | Seasonal avrg. of the avrg. daily relat. imp./contrib. <sup>1</sup><br>of the given cat. <sup>2</sup> on/to PM <sub>2.5</sub> (%) |             |             |              |             |             |
|--------------------|---------------------------------------------------------------------------------------------------------------------------------------------------|-------------|-------------|--------------|-------------|-------------|-----------------------------------------------------------------------------------------------------------------------------------|-------------|-------------|--------------|-------------|-------------|
|                    | Winter (DJF)                                                                                                                                      |             |             | Summer (JJA) |             |             | Winter (DJF)                                                                                                                      |             |             | Summer (JJA) |             |             |
|                    | SOAP                                                                                                                                              | VBS         | PSAT        | SOAP         | VBS         | PSAT        | SOAP                                                                                                                              | VBS         | PSAT        | SOAP         | VBS         | PSAT        |
|                    |                                                                                                                                                   |             |             |              |             |             |                                                                                                                                   |             |             |              |             |             |
| GNFR A             | 0.48                                                                                                                                              | 0.48        | 0.54        | 0.26         | 0.29        | 0.20        | 3.7                                                                                                                               | 3.4         | 4.2         | <b>8.4</b>   | <b>7.2</b>  | <b>6.4</b>  |
| GNFR B             | 0.97                                                                                                                                              | 0.97        | 1.00        | <b>0.59</b>  | <b>0.63</b> | <b>0.49</b> | <b>7.8</b>                                                                                                                        | <b>7.2</b>  | <b>7.9</b>  | <b>19.0</b>  | <b>15.7</b> | <b>16.0</b> |
| GNFR C             | <b>4.20</b>                                                                                                                                       | <b>5.14</b> | <b>3.97</b> | <b>0.38</b>  | <b>0.43</b> | 0.34        | <b>31.8</b>                                                                                                                       | <b>34.6</b> | <b>30.1</b> | <b>12.1</b>  | <b>10.7</b> | <b>10.6</b> |
| GNFR D             | 0.01                                                                                                                                              | 0.02        | 0.01        | 0.0          | 0.0         | 0.0         | 0.1                                                                                                                               | 0.1         | 0.0         | 0.1          | 0.1         | 0.1         |
| GNFR E             | 0.22                                                                                                                                              | 0.26        | 0.14        | 0.14         | 0.21        | 0.13        | 1.8                                                                                                                               | 1.8         | 1.2         | 4.8          | <b>5.1</b>  | 4.3         |
| GNFR F             | <b>2.07</b>                                                                                                                                       | <b>2.45</b> | <b>1.91</b> | <b>0.58</b>  | <b>1.23</b> | <b>0.43</b> | <b>15.0</b>                                                                                                                       | <b>16.5</b> | <b>13.9</b> | <b>19.2</b>  | <b>31.4</b> | <b>14.3</b> |
| GNFR G             | 0.15                                                                                                                                              | 0.15        | 0.17        | 0.05         | 0.07        | 0.04        | 1.2                                                                                                                               | 1.2         | 1.5         | 1.7          | 1.8         | 1.2         |
| GNFR H             | 0.0                                                                                                                                               | 0.0         | 0.0         | 0.0          | 0.0         | 0.0         | 0.0                                                                                                                               | 0.0         | 0.0         | 0.0          | 0.0         | 0.0         |
| GNFR I             | 0.47                                                                                                                                              | 0.49        | 0.52        | 0.21         | 0.31        | 0.16        | 3.4                                                                                                                               | 3.2         | 3.8         | <b>6.8</b>   | <b>8.0</b>  | <b>5.3</b>  |
| GNFR J             | 0.32                                                                                                                                              | 0.35        | 0.28        | 0.12         | 0.14        | 0.10        | 2.8                                                                                                                               | 2.9         | 2.4         | 3.8          | 3.5         | 3.3         |
| GNFR K             | <b>3.03</b>                                                                                                                                       | <b>3.05</b> | 0.84        | 0.21         | 0.23        | 0.11        | <b>28.5</b>                                                                                                                       | <b>26.5</b> | <b>7.3</b>  | <b>7.2</b>   | <b>5.9</b>  | 3.6         |
| GNFR L             | 1.51                                                                                                                                              | 1.51        | 0.78        | 0.13         | 0.14        | 0.07        | <b>8.9</b>                                                                                                                        | <b>8.2</b>  | 4.5         | 4.1          | 3.4         | 2.0         |
| BIO                | -                                                                                                                                                 | -           | 0.10        | -            | -           | <b>0.85</b> | -                                                                                                                                 | -           | 0.9         | -            | -           | <b>27.7</b> |
| IC                 | -                                                                                                                                                 | -           | 0.0         | -            | -           | 0.0         | -                                                                                                                                 | -           | 0.0         | -            | -           | 0.0         |
| BC                 | -                                                                                                                                                 | -           | <b>2.56</b> | -            | -           | 0.14        | -                                                                                                                                 | -           | <b>22.1</b> | -            | -           | <b>5.0</b>  |
| ∑                  | 13.43                                                                                                                                             | 14.87       | 12.82       | 2.67         | 3.68        | 3.06        | 105                                                                                                                               | 105.6       | 99.8        | 87.2         | 92.8        | 99.8        |

<sup>1</sup> While the impacts (imp.) are connected with the SOAP and VBS experiments, the contributions (contrib.) are connected with the PSAT experiment.

<sup>2</sup> The categories (cat.) considered in the SOAP and VBS experiments are GNFR sectors A–L; the categories considered in the PSAT experiment are GNFR sectors A–L, BIO – biogenic emissions, IC – initial condition, and BC – boundary conditions.



**Table S10.** Same as Table S5 but for Prague.

| Prague<br>Category | Seasonal avrg. of the avrg. daily abs. imp./contrib. <sup>1</sup><br>of the given cat. <sup>2</sup> on/to PM <sub>2.5</sub> (µg m <sup>-3</sup> ) |              |             |              |             |             | Seasonal avrg. of the avrg. daily relat. imp./contrib. <sup>1</sup><br>of the given cat. <sup>2</sup> on/to PM <sub>2.5</sub> (%) |             |             |              |             |             |
|--------------------|---------------------------------------------------------------------------------------------------------------------------------------------------|--------------|-------------|--------------|-------------|-------------|-----------------------------------------------------------------------------------------------------------------------------------|-------------|-------------|--------------|-------------|-------------|
|                    | Winter (DJF)                                                                                                                                      |              |             | Summer (JJA) |             |             | Winter (DJF)                                                                                                                      |             |             | Summer (JJA) |             |             |
|                    | SOAP                                                                                                                                              | VBS          | PSAT        | SOAP         | VBS         | PSAT        | SOAP                                                                                                                              | VBS         | PSAT        | SOAP         | VBS         | PSAT        |
| GNFR A             | 0.32                                                                                                                                              | 0.30         | 0.34        | 0.18         | 0.21        | 0.11        | 1.6                                                                                                                               | 1.4         | 1.8         | 4.5          | 4.2         | 2.8         |
| GNFR B             | 0.62                                                                                                                                              | 0.62         | 0.60        | <b>0.41</b>  | <b>0.44</b> | <b>0.32</b> | 3.4                                                                                                                               | 3.1         | 3.3         | <b>10.5</b>  | <b>9.2</b>  | <b>8.3</b>  |
| GNFR C             | <b>9.73</b>                                                                                                                                       | <b>12.39</b> | <b>9.45</b> | 0.33         | 0.36        | 0.29        | <b>49.6</b>                                                                                                                       | <b>54.1</b> | <b>48.2</b> | <b>8.5</b>   | <b>7.5</b>  | <b>7.4</b>  |
| GNFR D             | 0.01                                                                                                                                              | 0.02         | 0.01        | 0.01         | 0.01        | 0.01        | 0.1                                                                                                                               | 0.1         | 0.0         | 0.2          | 0.1         | 0.2         |
| GNFR E             | 0.15                                                                                                                                              | 0.20         | 0.06        | 0.10         | 0.17        | 0.09        | 0.7                                                                                                                               | 0.8         | 0.3         | 2.6          | 3.4         | 2.3         |
| GNFR F             | <b>3.66</b>                                                                                                                                       | <b>3.88</b>  | <b>3.55</b> | <b>1.81</b>  | <b>2.42</b> | <b>1.58</b> | <b>18.5</b>                                                                                                                       | <b>17.6</b> | <b>18.0</b> | <b>46.8</b>  | <b>51.5</b> | <b>40.7</b> |
| GNFR G             | 0.16                                                                                                                                              | 0.16         | 0.17        | 0.06         | 0.09        | 0.04        | 0.9                                                                                                                               | 0.8         | 1.1         | 1.7          | 2.0         | 1.0         |
| GNFR H             | 0.01                                                                                                                                              | 0.01         | 0.01        | 0.01         | 0.01        | 0.01        | 0.0                                                                                                                               | 0.1         | 0.0         | 0.2          | 0.2         | 0.2         |
| GNFR I             | 0.43                                                                                                                                              | 0.44         | 0.46        | 0.21         | 0.32        | 0.15        | 2.0                                                                                                                               | 1.8         | 2.2         | <b>5.4</b>   | <b>6.7</b>  | 3.9         |
| GNFR J             | 0.08                                                                                                                                              | 0.10         | 0.05        | 0.03         | 0.05        | 0.03        | 0.5                                                                                                                               | 0.5         | 0.3         | 0.9          | 1.2         | 0.8         |
| GNFR K             | <b>2.83</b>                                                                                                                                       | <b>2.85</b>  | 0.85        | <b>0.39</b>  | <b>0.41</b> | 0.16        | <b>18.7</b>                                                                                                                       | <b>17.0</b> | <b>5.0</b>  | <b>10.3</b>  | <b>9.0</b>  | 4.1         |
| GNFR L             | 1.35                                                                                                                                              | 1.33         | 0.81        | 0.20         | 0.22        | 0.09        | <b>5.9</b>                                                                                                                        | <b>5.2</b>  | 3.3         | <b>5.1</b>   | 4.6         | 2.2         |
| BIO                | -                                                                                                                                                 | -            | 0.11        | -            | -           | <b>0.74</b> | -                                                                                                                                 | -           | 0.6         | -            | -           | <b>19.1</b> |
| IC                 | -                                                                                                                                                 | -            | 0.0         | -            | -           | 0.0         | -                                                                                                                                 | -           | 0.0         | -            | -           | 0.0         |
| BC                 | -                                                                                                                                                 | -            | <b>2.56</b> | -            | -           | 0.25        | -                                                                                                                                 | -           | <b>15.6</b> | -            | -           | 6.8         |
| Σ                  | 19.35                                                                                                                                             | 22.30        | 19.03       | 3.74         | 4.71        | 3.87        | 101.9                                                                                                                             | 102.5       | 99.7        | 96.7         | 99.6        | 99.8        |

<sup>1</sup> While the impacts (imp.) are connected with the SOAP and VBS experiments, the contributions (contrib.) are connected with the PSAT experiment.

<sup>2</sup> The categories (cat.) considered in the SOAP and VBS experiments are GNFR sectors A–L; the categories considered in the PSAT experiment are GNFR sectors A–L, BIO – biogenic emissions, IC – initial condition, and BC – boundary conditions.

**Table S11.** Comparison of the seasonal averages of the average daily absolute impacts/contributions of the individual categories on/to PEC concentration in  $\mu\text{g m}^{-3}$  calculated from the SOAP and VBS/PSAT experiments above Berlin, Munich, Budapest, Warsaw, Vienna, and Prague.

| Category | Seasonal average of the average daily absolute impacts/contributions <sup>1</sup> of the given categories <sup>2</sup> on/to PEC ( $\mu\text{g m}^{-3}$ ) |      |      |              |      |      |               |      |      |              |      |      |
|----------|-----------------------------------------------------------------------------------------------------------------------------------------------------------|------|------|--------------|------|------|---------------|------|------|--------------|------|------|
|          | Winter (DJF)                                                                                                                                              |      |      | Summer (JJA) |      |      | Winter (DJF)  |      |      | Summer (JJA) |      |      |
|          | SOAP                                                                                                                                                      | VBS  | PSAT | SOAP         | VBS  | PSAT | SOAP          | VBS  | PSAT | SOAP         | VBS  | PSAT |
|          | <b>Berlin</b>                                                                                                                                             |      |      |              |      |      | <b>Warsaw</b> |      |      |              |      |      |
| GNFR A   | 0.01                                                                                                                                                      | 0.01 | 0.01 | 0.0          | 0.0  | 0.0  | 0.01          | 0.01 | 0.01 | 0.0          | 0.0  | 0.0  |
| GNFR B   | 0.02                                                                                                                                                      | 0.02 | 0.02 | 0.01         | 0.01 | 0.01 | 0.06          | 0.06 | 0.06 | 0.03         | 0.03 | 0.03 |
| GNFR C   | 0.39                                                                                                                                                      | 0.39 | 0.39 | 0.03         | 0.03 | 0.03 | 2.51          | 2.5  | 2.51 | 0.06         | 0.06 | 0.06 |
| GNFR D   | 0.0                                                                                                                                                       | 0.0  | 0.0  | 0.0          | 0.0  | 0.0  | 0.01          | 0.01 | 0.01 | 0.0          | 0.0  | 0.0  |
| GNFR E   | 0.0                                                                                                                                                       | 0.0  | 0.0  | 0.0          | 0.0  | 0.0  | 0.0           | 0.0  | 0.0  | 0.0          | 0.0  | 0.0  |
| GNFR F   | 0.09                                                                                                                                                      | 0.09 | 0.09 | 0.04         | 0.05 | 0.04 | 0.2           | 0.2  | 0.2  | 0.1          | 0.1  | 0.1  |
| GNFR G   | 0.01                                                                                                                                                      | 0.01 | 0.01 | 0.01         | 0.01 | 0.01 | 0.0           | 0.0  | 0.0  | 0.0          | 0.0  | 0.0  |
| GNFR H   | 0.0                                                                                                                                                       | 0.0  | 0.0  | 0.0          | 0.0  | 0.0  | 0.0           | 0.0  | 0.0  | 0.0          | 0.0  | 0.0  |
| GNFR I   | 0.07                                                                                                                                                      | 0.07 | 0.07 | 0.05         | 0.05 | 0.05 | 0.04          | 0.04 | 0.04 | 0.03         | 0.03 | 0.03 |
| GNFR J   | 0.05                                                                                                                                                      | 0.05 | 0.05 | 0.03         | 0.03 | 0.03 | 0.05          | 0.05 | 0.05 | 0.03         | 0.03 | 0.03 |
| GNFR K   | 0.0                                                                                                                                                       | 0.0  | 0.0  | 0.0          | 0.0  | 0.0  | 0.0           | 0.0  | 0.0  | 0.0          | 0.0  | 0.0  |
| GNFR L   | 0.0                                                                                                                                                       | 0.0  | 0.0  | 0.0          | 0.0  | 0.0  | 0.0           | 0.0  | 0.0  | 0.0          | 0.0  | 0.0  |
| BIO      | -                                                                                                                                                         | -    | 0.0  | -            | -    | 0.0  | -             | -    | 0.0  | -            | -    | 0.0  |
| IC       | -                                                                                                                                                         | -    | 0.0  | -            | -    | 0.0  | -             | -    | 0.0  | -            | -    | 0.0  |
| BC       | -                                                                                                                                                         | -    | 0.0  | -            | -    | 0.0  | -             | -    | 0.0  | -            | -    | 0.0  |
| $\Sigma$ | 0.64                                                                                                                                                      | 0.64 | 0.64 | 0.17         | 0.18 | 0.17 | 2.88          | 2.87 | 2.88 | 0.25         | 0.25 | 0.25 |
|          | <b>Munich</b>                                                                                                                                             |      |      |              |      |      | <b>Vienna</b> |      |      |              |      |      |
| GNFR A   | 0.01                                                                                                                                                      | 0.01 | 0.01 | 0.0          | 0.0  | 0.0  | 0.02          | 0.02 | 0.02 | 0.01         | 0.01 | 0.01 |
| GNFR B   | 0.02                                                                                                                                                      | 0.02 | 0.02 | 0.01         | 0.01 | 0.01 | 0.02          | 0.02 | 0.02 | 0.01         | 0.01 | 0.01 |
| GNFR C   | 0.41                                                                                                                                                      | 0.41 | 0.41 | 0.05         | 0.05 | 0.05 | 0.94          | 0.94 | 0.94 | 0.11         | 0.11 | 0.11 |
| GNFR D   | 0.0                                                                                                                                                       | 0.0  | 0.0  | 0.0          | 0.0  | 0.0  | 0.0           | 0.0  | 0.0  | 0.0          | 0.0  | 0.0  |
| GNFR E   | 0.0                                                                                                                                                       | 0.0  | 0.0  | 0.0          | 0.0  | 0.0  | 0.0           | 0.0  | 0.0  | 0.0          | 0.0  | 0.0  |
| GNFR F   | 0.11                                                                                                                                                      | 0.11 | 0.11 | 0.07         | 0.07 | 0.07 | 0.10          | 0.10 | 0.10 | 0.07         | 0.07 | 0.07 |
| GNFR G   | 0.0                                                                                                                                                       | 0.0  | 0.0  | 0.0          | 0.0  | 0.0  | 0.01          | 0.01 | 0.01 | 0.01         | 0.01 | 0.01 |
| GNFR H   | 0.0                                                                                                                                                       | 0.0  | 0.0  | 0.0          | 0.0  | 0.0  | 0.0           | 0.0  | 0.0  | 0.0          | 0.0  | 0.0  |
| GNFR I   | 0.07                                                                                                                                                      | 0.07 | 0.07 | 0.06         | 0.06 | 0.06 | 0.05          | 0.05 | 0.05 | 0.04         | 0.04 | 0.04 |
| GNFR J   | 0.05                                                                                                                                                      | 0.05 | 0.05 | 0.04         | 0.04 | 0.04 | 0.02          | 0.02 | 0.02 | 0.01         | 0.01 | 0.01 |
| GNFR K   | 0.0                                                                                                                                                       | 0.0  | 0.0  | 0.0          | 0.0  | 0.0  | 0.0           | 0.0  | 0.0  | 0.0          | 0.0  | 0.0  |
| GNFR L   | 0.0                                                                                                                                                       | 0.0  | 0.0  | 0.0          | 0.0  | 0.0  | 0.0           | 0.0  | 0.0  | 0.0          | 0.0  | 0.0  |
| BIO      | -                                                                                                                                                         | -    | 0.0  | -            | -    | 0.0  | -             | -    | 0.0  | -            | -    | 0.0  |
| IC       | -                                                                                                                                                         | -    | 0.0  | -            | -    | 0.0  | -             | -    | 0.0  | -            | -    | 0.0  |
| BC       | -                                                                                                                                                         | -    | 0.0  | -            | -    | 0.0  | -             | -    | 0.0  | -            | -    | 0.0  |
| $\Sigma$ | 0.67                                                                                                                                                      | 0.67 | 0.67 | 0.23         | 0.23 | 0.23 | 1.16          | 1.16 | 1.16 | 0.26         | 0.26 | 0.26 |
|          | <b>Budapest</b>                                                                                                                                           |      |      |              |      |      | <b>Prague</b> |      |      |              |      |      |
| GNFR A   | 0.0                                                                                                                                                       | 0.0  | 0.0  | 0.0          | 0.0  | 0.0  | 0.0           | 0.0  | 0.0  | 0.0          | 0.0  | 0.0  |
| GNFR B   | 0.02                                                                                                                                                      | 0.02 | 0.02 | 0.01         | 0.01 | 0.01 | 0.01          | 0.01 | 0.01 | 0.01         | 0.01 | 0.01 |
| GNFR C   | 3.35                                                                                                                                                      | 3.35 | 3.35 | 0.39         | 0.39 | 0.39 | 0.82          | 0.82 | 0.82 | 0.03         | 0.03 | 0.04 |
| GNFR D   | 0.0                                                                                                                                                       | 0.0  | 0.0  | 0.0          | 0.0  | 0.0  | 0.0           | 0.0  | 0.0  | 0.0          | 0.0  | 0.0  |
| GNFR E   | 0.0                                                                                                                                                       | 0.0  | 0.0  | 0.0          | 0.0  | 0.0  | 0.0           | 0.0  | 0.0  | 0.0          | 0.0  | 0.0  |
| GNFR F   | 0.17                                                                                                                                                      | 0.17 | 0.17 | 0.08         | 0.08 | 0.08 | 0.26          | 0.26 | 0.25 | 0.17         | 0.17 | 0.17 |
| GNFR G   | 0.01                                                                                                                                                      | 0.01 | 0.01 | 0.01         | 0.01 | 0.01 | 0.0           | 0.0  | 0.0  | 0.0          | 0.0  | 0.0  |
| GNFR H   | 0.0                                                                                                                                                       | 0.0  | 0.0  | 0.0          | 0.0  | 0.0  | 0.0           | 0.0  | 0.0  | 0.0          | 0.0  | 0.0  |
| GNFR I   | 0.03                                                                                                                                                      | 0.03 | 0.03 | 0.02         | 0.02 | 0.02 | 0.04          | 0.04 | 0.04 | 0.03         | 0.03 | 0.03 |
| GNFR J   | 0.06                                                                                                                                                      | 0.06 | 0.06 | 0.03         | 0.03 | 0.03 | 0.01          | 0.01 | 0.01 | 0.0          | 0.0  | 0.0  |
| GNFR K   | 0.0                                                                                                                                                       | 0.0  | 0.0  | 0.0          | 0.0  | 0.0  | 0.0           | 0.0  | 0.0  | 0.0          | 0.0  | 0.0  |
| GNFR L   | 0.0                                                                                                                                                       | 0.0  | 0.0  | 0.0          | 0.0  | 0.0  | 0.0           | 0.0  | 0.0  | 0.0          | 0.0  | 0.0  |
| BIO      | -                                                                                                                                                         | -    | 0.0  | -            | -    | 0.0  | -             | -    | 0.0  | -            | -    | 0.0  |
| IC       | -                                                                                                                                                         | -    | 0.0  | -            | -    | 0.0  | -             | -    | 0.0  | -            | -    | 0.0  |
| BC       | -                                                                                                                                                         | -    | 0.0  | -            | -    | 0.0  | -             | -    | 0.0  | -            | -    | 0.0  |
| $\Sigma$ | 3.64                                                                                                                                                      | 3.64 | 3.64 | 0.54         | 0.54 | 0.54 | 1.14          | 1.14 | 1.14 | 0.24         | 0.24 | 0.25 |

<sup>1</sup> While the impacts are connected with the SOAP and VBS experiments, the contributions are connected with the PSAT experiment.

<sup>2</sup> The categories considered in the SOAP and VBS experiments are GNFR sectors A–L; the categories considered in the PSAT experiment are GNFR sectors A–L, BIO – biogenic emissions, IC – initial condition, and BC – boundary conditions.

**Table S12.** Same as Table S11 but for FPRM.

| Seasonal average of the average daily absolute impacts/contributions <sup>1</sup> of the given categories <sup>2</sup> on/to FPRM ( $\mu\text{g m}^{-3}$ ) |              |      |      |              |      |               |              |      |      |              |      |      |
|------------------------------------------------------------------------------------------------------------------------------------------------------------|--------------|------|------|--------------|------|---------------|--------------|------|------|--------------|------|------|
| Category                                                                                                                                                   | Winter (DJF) |      |      | Summer (JJA) |      |               | Winter (DJF) |      |      | Summer (JJA) |      |      |
|                                                                                                                                                            | SOAP         | VBS  | PSAT | SOAP         | VBS  | PSAT          | SOAP         | VBS  | PSAT | SOAP         | VBS  | PSAT |
| <b>Berlin</b>                                                                                                                                              |              |      |      |              |      | <b>Warsaw</b> |              |      |      |              |      |      |
| GNFR A                                                                                                                                                     | 0.05         | 0.05 | 0.05 | 0.02         | 0.02 | 0.02          | 0.08         | 0.08 | 0.08 | 0.06         | 0.06 | 0.06 |
| GNFR B                                                                                                                                                     | 0.47         | 0.47 | 0.47 | 0.26         | 0.27 | 0.27          | 1.17         | 1.17 | 1.17 | 0.68         | 0.68 | 0.68 |
| GNFR C                                                                                                                                                     | 0.22         | 0.22 | 0.22 | 0.01         | 0.01 | 0.01          | 0.75         | 0.75 | 0.76 | 0.01         | 0.01 | 0.01 |
| GNFR D                                                                                                                                                     | 0.0          | 0.0  | 0.0  | 0.0          | 0.0  | 0.0           | 0.0          | 0.0  | 0.0  | 0.0          | 0.0  | 0.0  |
| GNFR E                                                                                                                                                     | 0.22         | 0.22 | 0.22 | 0.13         | 0.13 | 0.13          | 0.05         | 0.05 | 0.05 | 0.03         | 0.03 | 0.03 |
| GNFR F                                                                                                                                                     | 0.22         | 0.22 | 0.22 | 0.1          | 0.1  | 0.1           | 0.18         | 0.18 | 0.18 | 0.09         | 0.09 | 0.09 |
| GNFR G                                                                                                                                                     | 0.0          | 0.0  | 0.0  | 0.0          | 0.0  | 0.0           | 0.0          | 0.0  | 0.0  | 0.0          | 0.0  | 0.0  |
| GNFR H                                                                                                                                                     | 0.0          | 0.0  | 0.0  | 0.0          | 0.0  | 0.0           | 0.0          | 0.0  | 0.0  | 0.0          | 0.0  | 0.0  |
| GNFR I                                                                                                                                                     | 0.03         | 0.03 | 0.03 | 0.02         | 0.02 | 0.02          | 0.04         | 0.04 | 0.04 | 0.03         | 0.03 | 0.03 |
| GNFR J                                                                                                                                                     | 0.08         | 0.08 | 0.08 | 0.06         | 0.06 | 0.06          | 0.08         | 0.08 | 0.08 | 0.06         | 0.06 | 0.06 |
| GNFR K                                                                                                                                                     | 0.01         | 0.01 | 0.01 | 0.01         | 0.01 | 0.01          | 0.01         | 0.01 | 0.01 | 0.01         | 0.01 | 0.01 |
| GNFR L                                                                                                                                                     | 0.01         | 0.01 | 0.01 | 0.0          | 0.0  | 0.0           | 0.01         | 0.01 | 0.01 | 0.0          | 0.0  | 0.0  |
| BIO                                                                                                                                                        | -            | -    | 0.0  | -            | -    | 0.0           | -            | -    | 0.0  | -            | -    | 0.0  |
| IC                                                                                                                                                         | -            | -    | 0.0  | -            | -    | 0.0           | -            | -    | 0.0  | -            | -    | 0.0  |
| BC                                                                                                                                                         | -            | -    | 0.0  | -            | -    | 0.0           | -            | -    | 0.0  | -            | -    | 0.0  |
| $\Sigma$                                                                                                                                                   | 1.31         | 1.31 | 1.31 | 0.61         | 0.62 | 0.62          | 2.37         | 2.37 | 2.38 | 0.95         | 0.95 | 0.95 |
| <b>Munich</b>                                                                                                                                              |              |      |      |              |      | <b>Vienna</b> |              |      |      |              |      |      |
| GNFR A                                                                                                                                                     | 0.04         | 0.04 | 0.04 | 0.02         | 0.02 | 0.02          | 0.13         | 0.13 | 0.13 | 0.07         | 0.07 | 0.07 |
| GNFR B                                                                                                                                                     | 0.4          | 0.4  | 0.4  | 0.28         | 0.28 | 0.28          | 0.48         | 0.48 | 0.48 | 0.3          | 0.3  | 0.3  |
| GNFR C                                                                                                                                                     | 0.19         | 0.19 | 0.19 | 0.02         | 0.02 | 0.02          | 0.57         | 0.57 | 0.58 | 0.04         | 0.04 | 0.04 |
| GNFR D                                                                                                                                                     | 0.0          | 0.0  | 0.0  | 0.0          | 0.0  | 0.0           | 0.0          | 0.0  | 0.0  | 0.0          | 0.0  | 0.0  |
| GNFR E                                                                                                                                                     | 0.26         | 0.26 | 0.25 | 0.17         | 0.17 | 0.17          | 0.10         | 0.10 | 0.10 | 0.06         | 0.06 | 0.06 |
| GNFR F                                                                                                                                                     | 0.25         | 0.25 | 0.25 | 0.16         | 0.17 | 0.17          | 0.21         | 0.21 | 0.22 | 0.17         | 0.17 | 0.17 |
| GNFR G                                                                                                                                                     | 0.0          | 0.0  | 0.0  | 0.0          | 0.0  | 0.0           | 0.0          | 0.0  | 0.0  | 0.0          | 0.0  | 0.0  |
| GNFR H                                                                                                                                                     | 0.0          | 0.0  | 0.0  | 0.0          | 0.0  | 0.0           | 0.0          | 0.0  | 0.0  | 0.0          | 0.0  | 0.0  |
| GNFR I                                                                                                                                                     | 0.03         | 0.03 | 0.03 | 0.03         | 0.03 | 0.03          | 0.03         | 0.03 | 0.03 | 0.02         | 0.02 | 0.02 |
| GNFR J                                                                                                                                                     | 0.09         | 0.09 | 0.09 | 0.08         | 0.08 | 0.08          | 0.04         | 0.03 | 0.03 | 0.03         | 0.03 | 0.03 |
| GNFR K                                                                                                                                                     | 0.01         | 0.01 | 0.01 | 0.01         | 0.01 | 0.01          | 0.01         | 0.01 | 0.01 | 0.0          | 0.0  | 0.0  |
| GNFR L                                                                                                                                                     | 0.01         | 0.01 | 0.01 | 0.0          | 0.0  | 0.0           | 0.01         | 0.01 | 0.01 | 0.0          | 0.0  | 0.0  |
| BIO                                                                                                                                                        | -            | -    | 0.0  | -            | -    | 0.0           | -            | -    | 0.0  | -            | -    | 0.0  |
| IC                                                                                                                                                         | -            | -    | 0.0  | -            | -    | 0.0           | -            | -    | 0.0  | -            | -    | 0.0  |
| BC                                                                                                                                                         | -            | -    | 0.0  | -            | -    | 0.0           | -            | -    | 0.0  | -            | -    | 0.0  |
| $\Sigma$                                                                                                                                                   | 1.28         | 1.28 | 1.27 | 0.77         | 0.78 | 0.78          | 1.58         | 1.57 | 1.59 | 0.69         | 0.69 | 0.69 |
| <b>Budapest</b>                                                                                                                                            |              |      |      |              |      | <b>Prague</b> |              |      |      |              |      |      |
| GNFR A                                                                                                                                                     | 0.01         | 0.01 | 0.01 | 0.0          | 0.0  | 0.0           | 0.01         | 0.01 | 0.01 | 0.0          | 0.0  | 0.0  |
| GNFR B                                                                                                                                                     | 0.45         | 0.45 | 0.45 | 0.22         | 0.22 | 0.22          | 0.23         | 0.23 | 0.23 | 0.15         | 0.15 | 0.16 |
| GNFR C                                                                                                                                                     | 0.71         | 0.71 | 0.71 | 0.07         | 0.07 | 0.07          | 3.46         | 3.45 | 3.46 | 0.09         | 0.09 | 0.09 |
| GNFR D                                                                                                                                                     | 0.0          | 0.0  | 0.0  | 0.0          | 0.0  | 0.0           | 0.0          | 0.0  | 0.0  | 0.0          | 0.0  | 0.0  |
| GNFR E                                                                                                                                                     | 0.08         | 0.08 | 0.08 | 0.04         | 0.04 | 0.04          | 0.02         | 0.02 | 0.02 | 0.02         | 0.02 | 0.02 |
| GNFR F                                                                                                                                                     | 0.19         | 0.19 | 0.19 | 0.09         | 0.10 | 0.10          | 1.58         | 1.58 | 1.58 | 1.03         | 1.03 | 1.03 |
| GNFR G                                                                                                                                                     | 0.0          | 0.0  | 0.0  | 0.0          | 0.0  | 0.0           | 0.0          | 0.0  | 0.0  | 0.0          | 0.0  | 0.0  |
| GNFR H                                                                                                                                                     | 0.0          | 0.0  | 0.0  | 0.0          | 0.0  | 0.0           | 0.0          | 0.0  | 0.0  | 0.0          | 0.0  | 0.0  |
| GNFR I                                                                                                                                                     | 0.02         | 0.02 | 0.02 | 0.01         | 0.01 | 0.01          | 0.02         | 0.02 | 0.02 | 0.02         | 0.02 | 0.02 |
| GNFR J                                                                                                                                                     | 0.09         | 0.09 | 0.09 | 0.06         | 0.06 | 0.05          | 0.01         | 0.01 | 0.01 | 0.01         | 0.01 | 0.01 |
| GNFR K                                                                                                                                                     | 0.01         | 0.01 | 0.01 | 0.01         | 0.01 | 0.01          | 0.02         | 0.02 | 0.01 | 0.01         | 0.01 | 0.01 |
| GNFR L                                                                                                                                                     | 0.01         | 0.01 | 0.02 | 0.01         | 0.01 | 0.01          | 0.01         | 0.01 | 0.01 | 0.0          | 0.0  | 0.0  |
| BIO                                                                                                                                                        | -            | -    | 0.0  | -            | -    | 0.0           | -            | -    | 0.0  | -            | -    | 0.0  |
| IC                                                                                                                                                         | -            | -    | 0.0  | -            | -    | 0.0           | -            | -    | 0.0  | -            | -    | 0.0  |
| BC                                                                                                                                                         | -            | -    | 0.0  | -            | -    | 0.0           | -            | -    | 0.0  | -            | -    | 0.0  |
| $\Sigma$                                                                                                                                                   | 1.57         | 1.57 | 1.58 | 0.51         | 0.52 | 0.51          | 5.36         | 5.35 | 5.35 | 1.33         | 1.33 | 1.34 |

<sup>1</sup> While the impacts are connected with the SOAP and VBS experiments, the contributions are connected with the PSAT experiment.

<sup>2</sup> The categories considered in the SOAP and VBS experiments are GNFR sectors A–L; the categories considered in the PSAT experiment are GNFR sectors A–L, BIO – biogenic emissions, IC – initial condition, and BC – boundary conditions.

**Table S13.** Same as Table S11 but for POA.

| Category | Seasonal average of the average daily absolute impacts/contributions <sup>1</sup> of the given categories <sup>2</sup> on/to POA ( $\mu\text{g m}^{-3}$ ) |      |      |              |      |      |               |       |      |              |      |      |
|----------|-----------------------------------------------------------------------------------------------------------------------------------------------------------|------|------|--------------|------|------|---------------|-------|------|--------------|------|------|
|          | Winter (DJF)                                                                                                                                              |      |      | Summer (JJA) |      |      | Winter (DJF)  |       |      | Summer (JJA) |      |      |
|          | SOAP                                                                                                                                                      | VBS  | PSAT | SOAP         | VBS  | PSAT | SOAP          | VBS   | PSAT | SOAP         | VBS  | PSAT |
|          | <b>Berlin</b>                                                                                                                                             |      |      |              |      |      | <b>Warsaw</b> |       |      |              |      |      |
| GNFR A   | 0.01                                                                                                                                                      | 0.0  | 0.01 | 0.0          | 0.0  | 0.0  | 0.0           | 0.0   | 0.0  | 0.0          | 0.0  | 0.0  |
| GNFR B   | 0.03                                                                                                                                                      | 0.03 | 0.03 | 0.02         | 0.02 | 0.02 | 0.06          | 0.1   | 0.06 | 0.04         | 0.04 | 0.04 |
| GNFR C   | 0.41                                                                                                                                                      | 0.63 | 0.41 | 0.03         | 0.04 | 0.03 | 1.33          | 2.34  | 1.33 | 0.03         | 0.04 | 0.03 |
| GNFR D   | 0.0                                                                                                                                                       | 0.0  | 0.0  | 0.0          | 0.0  | 0.0  | 0.0           | 0.01  | 0.0  | 0.0          | 0.0  | 0.0  |
| GNFR E   | 0.0                                                                                                                                                       | 0.01 | 0.0  | 0.0          | 0.0  | 0.0  | 0.0           | 0.02  | 0.0  | 0.0          | 0.0  | 0.0  |
| GNFR F   | 0.05                                                                                                                                                      | 0.57 | 0.05 | 0.03         | 0.27 | 0.03 | 0.1           | 0.8   | 0.1  | 0.05         | 0.33 | 0.05 |
| GNFR G   | 0.01                                                                                                                                                      | 0.01 | 0.01 | 0.01         | 0.02 | 0.01 | 0.01          | 0.0   | 0.0  | 0.0          | 0.01 | 0.0  |
| GNFR H   | 0.0                                                                                                                                                       | 0.0  | 0.0  | 0.0          | 0.0  | 0.0  | 0.0           | 0.0   | 0.0  | 0.0          | 0.0  | 0.0  |
| GNFR I   | 0.09                                                                                                                                                      | 0.1  | 0.08 | 0.06         | 0.06 | 0.06 | 0.11          | 0.13  | 0.11 | 0.08         | 0.08 | 0.08 |
| GNFR J   | 0.13                                                                                                                                                      | 0.16 | 0.13 | 0.09         | 0.09 | 0.09 | 0.12          | 0.19  | 0.12 | 0.09         | 0.09 | 0.09 |
| GNFR K   | 0.02                                                                                                                                                      | 0.02 | 0.02 | 0.02         | 0.02 | 0.02 | 0.03          | 0.04  | 0.03 | 0.02         | 0.02 | 0.02 |
| GNFR L   | 0.0                                                                                                                                                       | 0.0  | 0.0  | 0.0          | 0.0  | 0.0  | 0.0           | 0.01  | 0.0  | 0.0          | 0.0  | 0.0  |
| BIO      | -                                                                                                                                                         | -    | 0.0  | -            | -    | 0.0  | -             | -     | 0.0  | -            | -    | 0.0  |
| IC       | -                                                                                                                                                         | -    | 0.0  | -            | -    | 0.0  | -             | -     | 0.0  | -            | -    | 0.0  |
| BC       | -                                                                                                                                                         | -    | 0.0  | -            | -    | 0.0  | -             | -     | 0.0  | -            | -    | 0.0  |
| $\Sigma$ | 0.75                                                                                                                                                      | 1.53 | 0.74 | 0.26         | 0.52 | 0.26 | 1.76          | 3.64  | 1.75 | 0.31         | 0.61 | 0.31 |
|          | <b>Munich</b>                                                                                                                                             |      |      |              |      |      | <b>Vienna</b> |       |      |              |      |      |
| GNFR A   | 0.01                                                                                                                                                      | 0.0  | 0.01 | 0.0          | 0.01 | 0.0  | 0.03          | 0.03  | 0.03 | 0.01         | 0.02 | 0.01 |
| GNFR B   | 0.02                                                                                                                                                      | 0.03 | 0.02 | 0.02         | 0.02 | 0.02 | 0.02          | 0.03  | 0.02 | 0.01         | 0.02 | 0.01 |
| GNFR C   | 0.44                                                                                                                                                      | 0.74 | 0.44 | 0.05         | 0.07 | 0.05 | 1.05          | 1.68  | 1.05 | 0.1          | 0.13 | 0.1  |
| GNFR D   | 0.0                                                                                                                                                       | 0.0  | 0.0  | 0.0          | 0.0  | 0.0  | 0.0           | 0.0   | 0.0  | 0.0          | 0.0  | 0.0  |
| GNFR E   | 0.0                                                                                                                                                       | 0.02 | 0.0  | 0.0          | 0.01 | 0.0  | 0.0           | 0.02  | 0.0  | 0.0          | 0.0  | 0.0  |
| GNFR F   | 0.07                                                                                                                                                      | 0.73 | 0.07 | 0.04         | 0.44 | 0.04 | 0.05          | 0.36  | 0.05 | 0.03         | 0.22 | 0.03 |
| GNFR G   | 0.0                                                                                                                                                       | 0.0  | 0.0  | 0.0          | 0.0  | 0.0  | 0.01          | 0.01  | 0.01 | 0.01         | 0.01 | 0.01 |
| GNFR H   | 0.0                                                                                                                                                       | 0.0  | 0.0  | 0.0          | 0.0  | 0.0  | 0.0           | 0.0   | 0.0  | 0.0          | 0.0  | 0.0  |
| GNFR I   | 0.08                                                                                                                                                      | 0.1  | 0.08 | 0.07         | 0.08 | 0.07 | 0.07          | 0.09  | 0.07 | 0.06         | 0.07 | 0.06 |
| GNFR J   | 0.13                                                                                                                                                      | 0.18 | 0.13 | 0.12         | 0.13 | 0.12 | 0.05          | 0.08  | 0.05 | 0.04         | 0.05 | 0.04 |
| GNFR K   | 0.03                                                                                                                                                      | 0.04 | 0.03 | 0.03         | 0.04 | 0.03 | 0.02          | 0.02  | 0.01 | 0.01         | 0.01 | 0.01 |
| GNFR L   | 0.0                                                                                                                                                       | 0.0  | 0.0  | 0.0          | 0.0  | 0.0  | 0.0           | 0.0   | 0.0  | 0.0          | 0.0  | 0.0  |
| BIO      | -                                                                                                                                                         | -    | 0.0  | -            | -    | 0.0  | -             | -     | 0.0  | -            | -    | 0.0  |
| IC       | -                                                                                                                                                         | -    | 0.0  | -            | -    | 0.0  | -             | -     | 0.0  | -            | -    | 0.0  |
| BC       | -                                                                                                                                                         | -    | 0.0  | -            | -    | 0.0  | -             | -     | 0.0  | -            | -    | 0.0  |
| $\Sigma$ | 0.78                                                                                                                                                      | 1.84 | 0.78 | 0.33         | 0.8  | 0.33 | 1.3           | 2.32  | 1.29 | 0.27         | 0.53 | 0.27 |
|          | <b>Budapest</b>                                                                                                                                           |      |      |              |      |      | <b>Prague</b> |       |      |              |      |      |
| GNFR A   | 0.0                                                                                                                                                       | 0.0  | 0.0  | 0.0          | 0.0  | 0.0  | 0.0           | -0.01 | 0.0  | 0.0          | 0.0  | 0.0  |
| GNFR B   | 0.03                                                                                                                                                      | 0.04 | 0.03 | 0.01         | 0.02 | 0.01 | 0.01          | 0.02  | 0.01 | 0.01         | 0.01 | 0.01 |
| GNFR C   | 2.68                                                                                                                                                      | 4.88 | 2.68 | 0.3          | 0.36 | 0.3  | 3.76          | 5.91  | 3.76 | 0.1          | 0.11 | 0.1  |
| GNFR D   | 0.0                                                                                                                                                       | 0.0  | 0.0  | 0.0          | 0.0  | 0.0  | 0.0           | 0.0   | 0.0  | 0.0          | 0.0  | 0.0  |
| GNFR E   | 0.0                                                                                                                                                       | 0.02 | 0.0  | 0.0          | 0.0  | 0.0  | 0.0           | 0.03  | 0.0  | 0.0          | 0.0  | 0.0  |
| GNFR F   | 0.07                                                                                                                                                      | 0.76 | 0.07 | 0.03         | 0.28 | 0.04 | 0.19          | 0.4   | 0.19 | 0.12         | 0.25 | 0.12 |
| GNFR G   | 0.01                                                                                                                                                      | 0.01 | 0.01 | 0.01         | 0.01 | 0.01 | 0.0           | 0.0   | 0.0  | 0.0          | 0.01 | 0.0  |
| GNFR H   | 0.0                                                                                                                                                       | 0.0  | 0.0  | 0.0          | 0.0  | 0.0  | 0.0           | 0.0   | 0.0  | 0.0          | 0.0  | 0.0  |
| GNFR I   | 0.04                                                                                                                                                      | 0.05 | 0.04 | 0.02         | 0.04 | 0.02 | 0.05          | 0.07  | 0.06 | 0.05         | 0.06 | 0.05 |
| GNFR J   | 0.14                                                                                                                                                      | 0.24 | 0.14 | 0.09         | 0.09 | 0.08 | 0.02          | 0.03  | 0.02 | 0.01         | 0.02 | 0.01 |
| GNFR K   | 0.02                                                                                                                                                      | 0.04 | 0.02 | 0.01         | 0.02 | 0.02 | 0.02          | 0.03  | 0.01 | 0.01         | 0.02 | 0.01 |
| GNFR L   | 0.01                                                                                                                                                      | 0.01 | 0.01 | 0.0          | 0.0  | 0.0  | 0.01          | 0.0   | 0.01 | 0.0          | 0.0  | 0.0  |
| BIO      | -                                                                                                                                                         | -    | 0.0  | -            | -    | 0.0  | -             | -     | 0.0  | -            | -    | 0.0  |
| IC       | -                                                                                                                                                         | -    | 0.0  | -            | -    | 0.0  | -             | -     | 0.0  | -            | -    | 0.0  |
| BC       | -                                                                                                                                                         | -    | 0.0  | -            | -    | 0.0  | -             | -     | 0.0  | -            | -    | 0.0  |
| $\Sigma$ | 3.0                                                                                                                                                       | 6.05 | 3.0  | 0.47         | 0.82 | 0.48 | 4.06          | 6.48  | 4.06 | 0.3          | 0.48 | 0.3  |

<sup>1</sup> While the impacts are connected with the SOAP and VBS experiments, the contributions are connected with the PSAT experiment.

<sup>2</sup> The categories considered in the SOAP and VBS experiments are GNFR sectors A–L; the categories considered in the PSAT experiment are GNFR sectors A–L, BIO – biogenic emissions, IC – initial condition, and BC – boundary conditions.

**Table S14.** Same as Table S11 but for  $\text{PNH}_4$ .

| Category | Seasonal average of the average daily absolute impacts/contributions <sup>1</sup> of the given categories <sup>2</sup> on/to $\text{PNH}_4$ ( $\mu\text{g m}^{-3}$ ) |      |      |              |      |      |               |      |      |              |      |      |
|----------|----------------------------------------------------------------------------------------------------------------------------------------------------------------------|------|------|--------------|------|------|---------------|------|------|--------------|------|------|
|          | Winter (DJF)                                                                                                                                                         |      |      | Summer (JJA) |      |      | Winter (DJF)  |      |      | Summer (JJA) |      |      |
|          | SOAP                                                                                                                                                                 | VBS  | PSAT | SOAP         | VBS  | PSAT | SOAP          | VBS  | PSAT | SOAP         | VBS  | PSAT |
|          | <b>Berlin</b>                                                                                                                                                        |      |      |              |      |      | <b>Warsaw</b> |      |      |              |      |      |
| GNFR A   | 0.1                                                                                                                                                                  | 0.1  | 0.01 | 0.05         | 0.05 | 0.0  | 0.08          | 0.08 | 0.0  | 0.07         | 0.07 | 0.0  |
| GNFR B   | 0.12                                                                                                                                                                 | 0.12 | 0.09 | 0.06         | 0.06 | 0.01 | 0.1           | 0.1  | 0.08 | 0.07         | 0.07 | 0.01 |
| GNFR C   | 0.23                                                                                                                                                                 | 0.23 | 0.05 | 0.01         | 0.01 | 0.0  | 0.46          | 0.46 | 0.28 | 0.01         | 0.01 | 0.0  |
| GNFR D   | 0.0                                                                                                                                                                  | 0.0  | 0.0  | 0.0          | 0.0  | 0.0  | 0.0           | 0.0  | 0.0  | 0.0          | 0.0  | 0.0  |
| GNFR E   | 0.02                                                                                                                                                                 | 0.02 | 0.02 | 0.0          | 0.0  | 0.0  | 0.01          | 0.01 | 0.0  | 0.0          | 0.0  | 0.0  |
| GNFR F   | 0.32                                                                                                                                                                 | 0.32 | 0.07 | 0.04         | 0.04 | 0.01 | 0.29          | 0.29 | 0.07 | 0.04         | 0.04 | 0.01 |
| GNFR G   | 0.09                                                                                                                                                                 | 0.09 | 0.0  | 0.02         | 0.02 | 0.0  | 0.04          | 0.04 | 0.0  | 0.01         | 0.01 | 0.0  |
| GNFR H   | 0.0                                                                                                                                                                  | 0.0  | 0.0  | 0.0          | 0.0  | 0.0  | 0.0           | 0.0  | 0.0  | 0.0          | 0.0  | 0.0  |
| GNFR I   | 0.06                                                                                                                                                                 | 0.06 | 0.0  | 0.01         | 0.01 | 0.0  | 0.06          | 0.06 | 0.0  | 0.01         | 0.01 | 0.0  |
| GNFR J   | 0.02                                                                                                                                                                 | 0.02 | 0.06 | 0.0          | 0.0  | 0.01 | 0.02          | 0.03 | 0.05 | 0.01         | 0.01 | 0.01 |
| GNFR K   | 0.69                                                                                                                                                                 | 0.69 | 0.81 | 0.08         | 0.08 | 0.12 | 0.82          | 0.82 | 0.99 | 0.11         | 0.11 | 0.16 |
| GNFR L   | 0.31                                                                                                                                                                 | 0.31 | 0.64 | 0.04         | 0.04 | 0.07 | 0.4           | 0.4  | 0.69 | 0.04         | 0.04 | 0.07 |
| BIO      | -                                                                                                                                                                    | -    | 0.0  | -            | -    | 0.0  | -             | -    | 0.0  | -            | -    | 0.0  |
| IC       | -                                                                                                                                                                    | -    | 0.0  | -            | -    | 0.0  | -             | -    | 0.0  | -            | -    | 0.0  |
| BC       | -                                                                                                                                                                    | -    | 0.0  | -            | -    | 0.0  | -             | -    | 0.0  | -            | -    | 0.0  |
| $\Sigma$ | 1.96                                                                                                                                                                 | 1.96 | 1.75 | 0.31         | 0.31 | 0.22 | 2.28          | 2.29 | 2.16 | 0.37         | 0.37 | 0.26 |
|          | <b>Munich</b>                                                                                                                                                        |      |      |              |      |      | <b>Vienna</b> |      |      |              |      |      |
| GNFR A   | 0.1                                                                                                                                                                  | 0.1  | 0.01 | 0.1          | 0.11 | 0.0  | 0.07          | 0.07 | 0.02 | 0.04         | 0.04 | 0.0  |
| GNFR B   | 0.13                                                                                                                                                                 | 0.13 | 0.07 | 0.14         | 0.14 | 0.02 | 0.1           | 0.1  | 0.04 | 0.06         | 0.06 | 0.0  |
| GNFR C   | 0.24                                                                                                                                                                 | 0.24 | 0.04 | 0.03         | 0.03 | 0.0  | 0.34          | 0.34 | 0.12 | 0.02         | 0.02 | 0.0  |
| GNFR D   | 0.0                                                                                                                                                                  | 0.0  | 0.0  | 0.0          | 0.0  | 0.0  | 0.0           | 0.0  | 0.0  | 0.0          | 0.0  | 0.0  |
| GNFR E   | 0.03                                                                                                                                                                 | 0.03 | 0.02 | 0.0          | 0.0  | 0.0  | 0.02          | 0.02 | 0.01 | 0.0          | 0.0  | 0.0  |
| GNFR F   | 0.39                                                                                                                                                                 | 0.4  | 0.08 | 0.13         | 0.14 | 0.02 | 0.38          | 0.38 | 0.05 | 0.04         | 0.04 | 0.0  |
| GNFR G   | 0.03                                                                                                                                                                 | 0.03 | 0.0  | 0.01         | 0.01 | 0.0  | 0.03          | 0.03 | 0.0  | 0.01         | 0.01 | 0.0  |
| GNFR H   | 0.0                                                                                                                                                                  | 0.0  | 0.0  | 0.0          | 0.0  | 0.0  | 0.0           | 0.0  | 0.0  | 0.0          | 0.0  | 0.0  |
| GNFR I   | 0.06                                                                                                                                                                 | 0.06 | 0.0  | 0.03         | 0.03 | 0.0  | 0.07          | 0.07 | 0.0  | 0.01         | 0.01 | 0.0  |
| GNFR J   | 0.02                                                                                                                                                                 | 0.02 | 0.05 | 0.01         | 0.01 | 0.02 | 0.05          | 0.05 | 0.16 | 0.01         | 0.01 | 0.02 |
| GNFR K   | 0.7                                                                                                                                                                  | 0.7  | 0.95 | 0.16         | 0.16 | 0.29 | 0.69          | 0.69 | 0.82 | 0.05         | 0.05 | 0.09 |
| GNFR L   | 0.2                                                                                                                                                                  | 0.2  | 0.63 | 0.04         | 0.04 | 0.11 | 0.35          | 0.35 | 0.69 | 0.03         | 0.03 | 0.06 |
| BIO      | -                                                                                                                                                                    | -    | 0.0  | -            | -    | 0.0  | -             | -    | 0.0  | -            | -    | 0.0  |
| IC       | -                                                                                                                                                                    | -    | 0.0  | -            | -    | 0.0  | -             | -    | 0.0  | -            | -    | 0.0  |
| BC       | -                                                                                                                                                                    | -    | 0.0  | -            | -    | 0.0  | -             | -    | 0.0  | -            | -    | 0.0  |
| $\Sigma$ | 1.9                                                                                                                                                                  | 1.91 | 1.85 | 0.65         | 0.67 | 0.46 | 2.1           | 2.1  | 1.91 | 0.27         | 0.27 | 0.17 |
|          | <b>Budapest</b>                                                                                                                                                      |      |      |              |      |      | <b>Prague</b> |      |      |              |      |      |
| GNFR A   | 0.07                                                                                                                                                                 | 0.07 | 0.0  | 0.03         | 0.03 | 0.0  | 0.08          | 0.08 | 0.0  | 0.05         | 0.05 | 0.0  |
| GNFR B   | 0.09                                                                                                                                                                 | 0.09 | 0.02 | 0.04         | 0.04 | 0.0  | 0.09          | 0.09 | 0.01 | 0.06         | 0.06 | 0.0  |
| GNFR C   | 0.5                                                                                                                                                                  | 0.51 | 0.38 | 0.02         | 0.02 | 0.0  | 0.33          | 0.34 | 0.21 | 0.02         | 0.02 | 0.0  |
| GNFR D   | 0.0                                                                                                                                                                  | 0.0  | 0.0  | 0.0          | 0.0  | 0.0  | 0.0           | 0.0  | 0.0  | 0.0          | 0.0  | 0.0  |
| GNFR E   | 0.01                                                                                                                                                                 | 0.01 | 0.01 | 0.0          | 0.0  | 0.0  | 0.02          | 0.02 | 0.0  | 0.0          | 0.0  | 0.0  |
| GNFR F   | 0.38                                                                                                                                                                 | 0.39 | 0.05 | 0.01         | 0.01 | 0.0  | 0.35          | 0.36 | 0.1  | 0.07         | 0.07 | 0.01 |
| GNFR G   | 0.03                                                                                                                                                                 | 0.03 | 0.0  | 0.0          | 0.0  | 0.0  | 0.04          | 0.04 | 0.0  | 0.01         | 0.01 | 0.0  |
| GNFR H   | 0.0                                                                                                                                                                  | 0.0  | 0.0  | 0.0          | 0.0  | 0.0  | 0.0           | 0.0  | 0.0  | 0.0          | 0.0  | 0.0  |
| GNFR I   | 0.09                                                                                                                                                                 | 0.09 | 0.0  | 0.0          | 0.0  | 0.0  | 0.07          | 0.07 | 0.0  | 0.02         | 0.02 | 0.0  |
| GNFR J   | 0.02                                                                                                                                                                 | 0.02 | 0.07 | 0.0          | 0.0  | 0.0  | 0.01          | 0.01 | 0.01 | 0.0          | 0.0  | 0.0  |
| GNFR K   | 0.66                                                                                                                                                                 | 0.66 | 0.89 | 0.02         | 0.02 | 0.07 | 0.64          | 0.64 | 0.82 | 0.09         | 0.09 | 0.14 |
| GNFR L   | 0.32                                                                                                                                                                 | 0.32 | 0.55 | 0.01         | 0.01 | 0.03 | 0.31          | 0.31 | 0.66 | 0.04         | 0.05 | 0.07 |
| BIO      | -                                                                                                                                                                    | -    | 0.0  | -            | -    | 0.0  | -             | -    | 0.0  | -            | -    | 0.0  |
| IC       | -                                                                                                                                                                    | -    | 0.0  | -            | -    | 0.0  | -             | -    | 0.0  | -            | -    | 0.0  |
| BC       | -                                                                                                                                                                    | -    | 0.0  | -            | -    | 0.0  | -             | -    | 0.0  | -            | -    | 0.0  |
| $\Sigma$ | 2.17                                                                                                                                                                 | 2.19 | 1.97 | 0.13         | 0.13 | 0.10 | 1.94          | 1.96 | 1.81 | 0.36         | 0.37 | 0.22 |

<sup>1</sup> While the impacts are connected with the SOAP and VBS experiments, the contributions are connected with the PSAT experiment.<sup>2</sup> The categories considered in the SOAP and VBS experiments are GNFR sectors A–L; the categories considered in the PSAT experiment are GNFR sectors A–L, BIO – biogenic emissions, IC – initial condition, and BC – boundary conditions.

**Table S15.** Same as Table S11 but for PNO<sub>3</sub>.

| Category | Seasonal average of the average daily absolute impacts/contributions <sup>1</sup> of the given categories <sup>2</sup> on/to PNO <sub>3</sub> (µg m <sup>-3</sup> ) |      |      |              |      |      |               |      |      |              |      |      |
|----------|---------------------------------------------------------------------------------------------------------------------------------------------------------------------|------|------|--------------|------|------|---------------|------|------|--------------|------|------|
|          | Winter (DJF)                                                                                                                                                        |      |      | Summer (JJA) |      |      | Winter (DJF)  |      |      | Summer (JJA) |      |      |
|          | SOAP                                                                                                                                                                | VBS  | PSAT | SOAP         | VBS  | PSAT | SOAP          | VBS  | PSAT | SOAP         | VBS  | PSAT |
|          | <b>Berlin</b>                                                                                                                                                       |      |      |              |      |      | <b>Warsaw</b> |      |      |              |      |      |
| GNFR A   | 0.15                                                                                                                                                                | 0.15 | 0.27 | 0.04         | 0.04 | 0.02 | 0.08          | 0.08 | 0.21 | 0.03         | 0.03 | 0.02 |
| GNFR B   | 0.21                                                                                                                                                                | 0.21 | 0.2  | 0.05         | 0.05 | 0.02 | 0.15          | 0.15 | 0.14 | 0.06         | 0.06 | 0.01 |
| GNFR C   | 0.49                                                                                                                                                                | 0.49 | 0.53 | 0.02         | 0.02 | 0.01 | 0.72          | 0.73 | 0.77 | 0.01         | 0.01 | 0.0  |
| GNFR D   | 0.0                                                                                                                                                                 | 0.0  | 0.0  | 0.0          | 0.0  | 0.0  | 0.01          | 0.01 | 0.0  | 0.0          | 0.0  | 0.0  |
| GNFR E   | 0.07                                                                                                                                                                | 0.07 | 0.0  | 0.01         | 0.01 | 0.0  | 0.05          | 0.05 | 0.0  | 0.0          | 0.0  | 0.0  |
| GNFR F   | 1.17                                                                                                                                                                | 1.18 | 1.25 | 0.13         | 0.14 | 0.09 | 1.21          | 1.22 | 1.42 | 0.15         | 0.16 | 0.12 |
| GNFR G   | 0.31                                                                                                                                                                | 0.31 | 0.36 | 0.07         | 0.07 | 0.05 | 0.16          | 0.16 | 0.21 | 0.03         | 0.03 | 0.02 |
| GNFR H   | 0.0                                                                                                                                                                 | 0.0  | 0.0  | 0.0          | 0.0  | 0.0  | 0.0           | 0.0  | 0.0  | 0.0          | 0.0  | 0.0  |
| GNFR I   | 0.22                                                                                                                                                                | 0.22 | 0.3  | 0.04         | 0.04 | 0.03 | 0.26          | 0.26 | 0.38 | 0.06         | 0.06 | 0.04 |
| GNFR J   | 0.06                                                                                                                                                                | 0.06 | 0.0  | 0.01         | 0.01 | 0.0  | 0.06          | 0.06 | 0.01 | 0.01         | 0.01 | 0.0  |
| GNFR K   | 2.21                                                                                                                                                                | 2.21 | 0.0  | 0.21         | 0.22 | 0.0  | 2.28          | 2.29 | 0.0  | 0.2          | 0.21 | 0.0  |
| GNFR L   | 0.88                                                                                                                                                                | 0.88 | 0.01 | 0.11         | 0.11 | 0.0  | 0.7           | 0.7  | 0.02 | 0.08         | 0.08 | 0.0  |
| BIO      | -                                                                                                                                                                   | -    | 0.01 | -            | -    | 0.01 | -             | -    | 0.01 | -            | -    | 0.02 |
| IC       | -                                                                                                                                                                   | -    | 0.0  | -            | -    | 0.0  | -             | -    | 0.0  | -            | -    | 0.0  |
| BC       | -                                                                                                                                                                   | -    | 2.32 | -            | -    | 0.19 | -             | -    | 2.41 | -            | -    | 0.17 |
| Σ        | 5.77                                                                                                                                                                | 5.78 | 5.25 | 0.69         | 0.71 | 0.42 | 5.68          | 5.71 | 5.58 | 0.63         | 0.65 | 0.4  |
|          | <b>Munich</b>                                                                                                                                                       |      |      |              |      |      | <b>Vienna</b> |      |      |              |      |      |
| GNFR A   | 0.12                                                                                                                                                                | 0.12 | 0.25 | 0.1          | 0.11 | 0.07 | 0.12          | 0.12 | 0.2  | 0.04         | 0.04 | 0.01 |
| GNFR B   | 0.16                                                                                                                                                                | 0.16 | 0.22 | 0.12         | 0.12 | 0.06 | 0.14          | 0.14 | 0.21 | 0.06         | 0.06 | 0.02 |
| GNFR C   | 0.52                                                                                                                                                                | 0.52 | 0.57 | 0.05         | 0.05 | 0.03 | 0.68          | 0.69 | 0.63 | 0.02         | 0.02 | 0.01 |
| GNFR D   | 0.0                                                                                                                                                                 | 0.0  | 0.0  | 0.0          | 0.0  | 0.0  | 0.0           | 0.0  | 0.0  | 0.0          | 0.0  | 0.0  |
| GNFR E   | 0.1                                                                                                                                                                 | 0.1  | 0.0  | 0.0          | 0.0  | 0.0  | 0.05          | 0.05 | 0.0  | 0.0          | 0.0  | 0.0  |
| GNFR F   | 1.44                                                                                                                                                                | 1.46 | 1.55 | 0.47         | 0.49 | 0.35 | 1.39          | 1.41 | 1.45 | 0.14         | 0.14 | 0.1  |
| GNFR G   | 0.1                                                                                                                                                                 | 0.1  | 0.13 | 0.03         | 0.03 | 0.02 | 0.1           | 0.1  | 0.14 | 0.02         | 0.02 | 0.01 |
| GNFR H   | 0.0                                                                                                                                                                 | 0.0  | 0.0  | 0.0          | 0.0  | 0.0  | 0.0           | 0.0  | 0.0  | 0.0          | 0.0  | 0.0  |
| GNFR I   | 0.2                                                                                                                                                                 | 0.2  | 0.27 | 0.11         | 0.11 | 0.08 | 0.27          | 0.27 | 0.37 | 0.05         | 0.05 | 0.03 |
| GNFR J   | 0.04                                                                                                                                                                | 0.04 | 0.0  | 0.02         | 0.02 | 0.0  | 0.13          | 0.14 | 0.01 | 0.02         | 0.02 | 0.0  |
| GNFR K   | 2.21                                                                                                                                                                | 2.22 | 0.0  | 0.38         | 0.39 | 0.0  | 2.18          | 2.19 | 0.0  | 0.14         | 0.14 | 0.0  |
| GNFR L   | 0.52                                                                                                                                                                | 0.52 | 0.04 | 0.11         | 0.12 | 0.0  | 0.96          | 0.96 | 0.07 | 0.09         | 0.09 | 0.0  |
| BIO      | -                                                                                                                                                                   | -    | 0.01 | -            | -    | 0.03 | -             | -    | 0.01 | -            | -    | 0.01 |
| IC       | -                                                                                                                                                                   | -    | 0.0  | -            | -    | 0.0  | -             | -    | 0.0  | -            | -    | 0.0  |
| BC       | -                                                                                                                                                                   | -    | 2.46 | -            | -    | 0.24 | -             | -    | 2.51 | -            | -    | 0.10 |
| Σ        | 5.41                                                                                                                                                                | 5.44 | 5.50 | 1.39         | 1.44 | 0.88 | 6.02          | 6.07 | 5.6  | 0.58         | 0.58 | 0.29 |
|          | <b>Budapest</b>                                                                                                                                                     |      |      |              |      |      | <b>Prague</b> |      |      |              |      |      |
| GNFR A   | 0.09                                                                                                                                                                | 0.09 | 0.13 | 0.01         | 0.01 | 0.0  | 0.11          | 0.11 | 0.17 | 0.04         | 0.04 | 0.01 |
| GNFR B   | 0.13                                                                                                                                                                | 0.13 | 0.16 | 0.02         | 0.02 | 0.0  | 0.12          | 0.12 | 0.14 | 0.05         | 0.05 | 0.01 |
| GNFR C   | 0.91                                                                                                                                                                | 0.93 | 0.74 | 0.01         | 0.01 | 0.0  | 0.71          | 0.73 | 0.55 | 0.02         | 0.02 | 0.01 |
| GNFR D   | 0.0                                                                                                                                                                 | 0.0  | 0.0  | 0.0          | 0.0  | 0.0  | 0.0           | 0.0  | 0.0  | 0.0          | 0.0  | 0.0  |
| GNFR E   | 0.03                                                                                                                                                                | 0.03 | 0.0  | 0.0          | 0.0  | 0.0  | 0.05          | 0.05 | 0.0  | 0.0          | 0.0  | 0.0  |
| GNFR F   | 1.42                                                                                                                                                                | 1.43 | 1.42 | 0.04         | 0.04 | 0.03 | 1.35          | 1.36 | 1.40 | 0.26         | 0.27 | 0.18 |
| GNFR G   | 0.1                                                                                                                                                                 | 0.1  | 0.13 | 0.0          | 0.0  | 0.0  | 0.12          | 0.12 | 0.16 | 0.03         | 0.03 | 0.02 |
| GNFR H   | 0.0                                                                                                                                                                 | 0.0  | 0.0  | 0.0          | 0.0  | 0.0  | 0.0           | 0.0  | 0.0  | 0.0          | 0.0  | 0.0  |
| GNFR I   | 0.32                                                                                                                                                                | 0.32 | 0.37 | 0.01         | 0.01 | 0.01 | 0.26          | 0.26 | 0.33 | 0.07         | 0.07 | 0.04 |
| GNFR J   | 0.06                                                                                                                                                                | 0.06 | 0.01 | 0.01         | 0.01 | 0.0  | 0.03          | 0.03 | 0.0  | 0.0          | 0.0  | 0.0  |
| GNFR K   | 1.9                                                                                                                                                                 | 1.9  | 0.0  | 0.05         | 0.05 | 0.0  | 2.03          | 2.04 | 0.0  | 0.26         | 0.27 | 0.0  |
| GNFR L   | 0.86                                                                                                                                                                | 0.86 | 0.04 | 0.02         | 0.02 | 0.0  | 0.84          | 0.84 | 0.12 | 0.14         | 0.14 | 0.01 |
| BIO      | -                                                                                                                                                                   | -    | 0.01 | -            | -    | 0.01 | -             | -    | 0.01 | -            | -    | 0.02 |
| IC       | -                                                                                                                                                                   | -    | 0.0  | -            | -    | 0.0  | -             | -    | 0.0  | -            | -    | 0.0  |
| BC       | -                                                                                                                                                                   | -    | 2.47 | -            | -    | 0.04 | -             | -    | 2.51 | -            | -    | 0.21 |
| Σ        | 5.82                                                                                                                                                                | 5.85 | 5.48 | 0.17         | 0.17 | 0.09 | 5.62          | 5.66 | 5.39 | 0.87         | 0.89 | 0.51 |

<sup>1</sup> While the impacts are connected with the SOAP and VBS experiments, the contributions are connected with the PSAT experiment.

<sup>2</sup> The categories considered in the SOAP and VBS experiments are GNFR sectors A–L; the categories considered in the PSAT experiment are GNFR sectors A–L, BIO – biogenic emissions, IC – initial condition, and BC – boundary conditions.

**Table S16.** Same as Table S11 but for  $\text{PSO}_4$ .

| Seasonal average of the average daily absolute impacts/contributions <sup>1</sup> of the given categories <sup>2</sup> on/to $\text{PSO}_4$ ( $\mu\text{g m}^{-3}$ ) |              |       |      |              |      |               |              |       |      |              |      |      |
|----------------------------------------------------------------------------------------------------------------------------------------------------------------------|--------------|-------|------|--------------|------|---------------|--------------|-------|------|--------------|------|------|
| Category                                                                                                                                                             | Winter (DJF) |       |      | Summer (JJA) |      |               | Winter (DJF) |       |      | Summer (JJA) |      |      |
|                                                                                                                                                                      | SOAP         | VBS   | PSAT | SOAP         | VBS  | PSAT          | SOAP         | VBS   | PSAT | SOAP         | VBS  | PSAT |
| <b>Berlin</b>                                                                                                                                                        |              |       |      |              |      | <b>Warsaw</b> |              |       |      |              |      |      |
| GNFR A                                                                                                                                                               | 0.14         | 0.14  | 0.18 | 0.1          | 0.1  | 0.11          | 0.17         | 0.17  | 0.33 | 0.16         | 0.16 | 0.2  |
| GNFR B                                                                                                                                                               | 0.19         | 0.19  | 0.21 | 0.14         | 0.14 | 0.15          | 0.22         | 0.22  | 0.32 | 0.19         | 0.19 | 0.22 |
| GNFR C                                                                                                                                                               | 0.25         | 0.25  | 0.29 | 0.02         | 0.02 | 0.02          | 0.71         | 0.71  | 0.97 | 0.03         | 0.03 | 0.03 |
| GNFR D                                                                                                                                                               | 0.0          | 0.0   | 0.0  | 0.0          | 0.0  | 0.0           | 0.0          | 0.0   | 0.0  | 0.0          | 0.0  | 0.0  |
| GNFR E                                                                                                                                                               | 0.01         | 0.01  | 0.0  | 0.0          | 0.0  | 0.0           | 0.0          | 0.0   | 0.0  | 0.0          | 0.0  | 0.0  |
| GNFR F                                                                                                                                                               | -0.04        | -0.04 | 0.0  | 0.01         | 0.01 | 0.0           | -0.13        | -0.13 | 0.01 | 0.0          | 0.0  | 0.0  |
| GNFR G                                                                                                                                                               | 0.0          | 0.0   | 0.01 | 0.01         | 0.01 | 0.01          | -0.02        | -0.02 | 0.01 | 0.0          | 0.0  | 0.01 |
| GNFR H                                                                                                                                                               | 0.0          | 0.0   | 0.0  | 0.0          | 0.0  | 0.0           | 0.0          | 0.0   | 0.0  | 0.0          | 0.0  | 0.0  |
| GNFR I                                                                                                                                                               | -0.01        | -0.01 | 0.01 | 0.0          | 0.0  | 0.0           | -0.03        | -0.03 | 0.01 | 0.0          | 0.0  | 0.0  |
| GNFR J                                                                                                                                                               | 0.01         | 0.01  | 0.0  | 0.0          | 0.0  | 0.0           | 0.02         | 0.02  | 0.0  | 0.01         | 0.01 | 0.0  |
| GNFR K                                                                                                                                                               | 0.12         | 0.12  | 0.0  | 0.04         | 0.04 | 0.0           | 0.38         | 0.38  | 0.0  | 0.13         | 0.13 | 0.0  |
| GNFR L                                                                                                                                                               | 0.13         | 0.13  | 0.0  | 0.02         | 0.02 | 0.0           | 0.50         | 0.50  | 0.0  | 0.05         | 0.05 | 0.0  |
| BIO                                                                                                                                                                  | -            | -     | 0.0  | -            | -    | 0.0           | -            | -     | 0.0  | -            | -    | 0.0  |
| IC                                                                                                                                                                   | -            | -     | 0.0  | -            | -    | 0.0           | -            | -     | 0.0  | -            | -    | 0.0  |
| BC                                                                                                                                                                   | -            | -     | 0.0  | -            | -    | 0.0           | -            | -     | 0.0  | -            | -    | 0.0  |
| $\Sigma$                                                                                                                                                             | 0.8          | 0.8   | 0.7  | 0.34         | 0.34 | 0.29          | 1.82         | 1.82  | 1.65 | 0.57         | 0.57 | 0.46 |
| <b>Munich</b>                                                                                                                                                        |              |       |      |              |      | <b>Vienna</b> |              |       |      |              |      |      |
| GNFR A                                                                                                                                                               | 0.18         | 0.18  | 0.21 | 0.2          | 0.2  | 0.21          | 0.12         | 0.12  | 0.15 | 0.09         | 0.09 | 0.09 |
| GNFR B                                                                                                                                                               | 0.24         | 0.24  | 0.26 | 0.3          | 0.3  | 0.31          | 0.2          | 0.2   | 0.23 | 0.14         | 0.14 | 0.14 |
| GNFR C                                                                                                                                                               | 0.24         | 0.24  | 0.27 | 0.03         | 0.03 | 0.04          | 0.41         | 0.4   | 0.46 | 0.03         | 0.03 | 0.03 |
| GNFR D                                                                                                                                                               | 0.0          | 0.0   | 0.0  | 0.0          | 0.0  | 0.0           | 0.0          | 0.0   | 0.0  | 0.0          | 0.0  | 0.0  |
| GNFR E                                                                                                                                                               | 0.01         | 0.01  | 0.0  | 0.0          | 0.0  | 0.0           | 0.0          | 0.0   | 0.0  | 0.0          | 0.0  | 0.0  |
| GNFR F                                                                                                                                                               | -0.04        | -0.04 | 0.01 | 0.01         | 0.01 | 0.01          | -0.06        | -0.06 | 0.01 | 0.01         | 0.01 | 0.0  |
| GNFR G                                                                                                                                                               | 0.0          | 0.0   | 0.01 | 0.0          | 0.0  | 0.0           | 0.0          | 0.0   | 0.01 | 0.01         | 0.01 | 0.01 |
| GNFR H                                                                                                                                                               | 0.0          | 0.0   | 0.0  | 0.0          | 0.0  | 0.0           | 0.0          | 0.0   | 0.0  | 0.0          | 0.0  | 0.0  |
| GNFR I                                                                                                                                                               | 0.0          | 0.0   | 0.01 | 0.0          | 0.0  | 0.01          | -0.01        | -0.01 | 0.0  | 0.0          | 0.0  | 0.0  |
| GNFR J                                                                                                                                                               | 0.01         | 0.01  | 0.0  | 0.0          | 0.0  | 0.0           | 0.02         | 0.02  | 0.0  | 0.0          | 0.0  | 0.0  |
| GNFR K                                                                                                                                                               | 0.14         | 0.14  | 0.0  | 0.12         | 0.12 | 0.0           | 0.13         | 0.13  | 0.0  | 0.02         | 0.02 | 0.0  |
| GNFR L                                                                                                                                                               | 0.13         | 0.13  | 0.0  | 0.02         | 0.02 | 0.0           | 0.18         | 0.18  | 0.0  | 0.01         | 0.01 | 0.0  |
| BIO                                                                                                                                                                  | -            | -     | 0.0  | -            | -    | 0.0           | -            | -     | 0.0  | -            | -    | 0.0  |
| IC                                                                                                                                                                   | -            | -     | 0.0  | -            | -    | 0.0           | -            | -     | 0.0  | -            | -    | 0.0  |
| BC                                                                                                                                                                   | -            | -     | 0.0  | -            | -    | 0.0           | -            | -     | 0.0  | -            | -    | 0.0  |
| $\Sigma$                                                                                                                                                             | 0.91         | 0.91  | 0.77 | 0.68         | 0.68 | 0.58          | 0.99         | 0.98  | 0.86 | 0.31         | 0.31 | 0.27 |
| <b>Budapest</b>                                                                                                                                                      |              |       |      |              |      | <b>Prague</b> |              |       |      |              |      |      |
| GNFR A                                                                                                                                                               | 0.12         | 0.12  | 0.16 | 0.08         | 0.08 | 0.08          | 0.13         | 0.13  | 0.15 | 0.09         | 0.09 | 0.09 |
| GNFR B                                                                                                                                                               | 0.18         | 0.18  | 0.22 | 0.11         | 0.11 | 0.12          | 0.16         | 0.16  | 0.18 | 0.13         | 0.13 | 0.13 |
| GNFR C                                                                                                                                                               | 0.65         | 0.65  | 0.7  | 0.03         | 0.03 | 0.03          | 0.44         | 0.44  | 0.47 | 0.03         | 0.03 | 0.03 |
| GNFR D                                                                                                                                                               | 0.0          | 0.0   | 0.0  | 0.0          | 0.0  | 0.0           | 0.0          | 0.0   | 0.0  | 0.0          | 0.0  | 0.0  |
| GNFR E                                                                                                                                                               | 0.0          | 0.0   | 0.0  | 0.0          | 0.0  | 0.0           | 0.0          | 0.0   | 0.0  | 0.0          | 0.0  | 0.0  |
| GNFR F                                                                                                                                                               | -0.06        | -0.06 | 0.01 | 0.01         | 0.01 | 0.0           | -0.04        | -0.04 | 0.01 | 0.01         | 0.01 | 0.01 |
| GNFR G                                                                                                                                                               | 0.0          | 0.0   | 0.01 | 0.01         | 0.01 | 0.01          | 0.0          | 0.0   | 0.01 | 0.01         | 0.01 | 0.01 |
| GNFR H                                                                                                                                                               | 0.0          | 0.0   | 0.0  | 0.0          | 0.0  | 0.0           | 0.0          | 0.0   | 0.0  | 0.0          | 0.0  | 0.0  |
| GNFR I                                                                                                                                                               | -0.01        | -0.01 | 0.01 | 0.0          | 0.0  | 0.0           | -0.01        | -0.01 | 0.0  | 0.0          | 0.0  | 0.0  |
| GNFR J                                                                                                                                                               | 0.01         | 0.01  | 0.0  | 0.0          | 0.0  | 0.0           | 0.0          | 0.0   | 0.0  | 0.0          | 0.0  | 0.0  |
| GNFR K                                                                                                                                                               | 0.26         | 0.26  | 0.0  | 0.01         | 0.01 | 0.0           | 0.12         | 0.12  | 0.0  | 0.02         | 0.02 | 0.0  |
| GNFR L                                                                                                                                                               | 0.18         | 0.18  | 0.0  | 0.01         | 0.01 | 0.0           | 0.18         | 0.18  | 0.0  | 0.01         | 0.01 | 0.0  |
| BIO                                                                                                                                                                  | -            | -     | 0.0  | -            | -    | 0.0           | -            | -     | 0.0  | -            | -    | 0.0  |
| IC                                                                                                                                                                   | -            | -     | 0.0  | -            | -    | 0.0           | -            | -     | 0.0  | -            | -    | 0.0  |
| BC                                                                                                                                                                   | -            | -     | 0.0  | -            | -    | 0.0           | -            | -     | 0.0  | -            | -    | 0.0  |
| $\Sigma$                                                                                                                                                             | 1.33         | 1.33  | 1.11 | 0.26         | 0.26 | 0.24          | 0.98         | 0.98  | 0.82 | 0.3          | 0.3  | 0.27 |

<sup>1</sup> While the impacts are connected with the SOAP and VBS experiments, the contributions are connected with the PSAT experiment.

<sup>2</sup> The categories considered in the SOAP and VBS experiments are GNFR sectors A–L; the categories considered in the PSAT experiment are GNFR sectors A–L, BIO – biogenic emissions, IC – initial condition, and BC – boundary conditions.

**Table S17.** Same as Table S11 but for SOA.

| Category | Seasonal average of the average daily absolute impacts/contributions <sup>1</sup> of the given categories <sup>2</sup> on/to SOA ( $\mu\text{g m}^{-3}$ ) |       |      |              |      |      |               |       |      |              |      |      |
|----------|-----------------------------------------------------------------------------------------------------------------------------------------------------------|-------|------|--------------|------|------|---------------|-------|------|--------------|------|------|
|          | Winter (DJF)                                                                                                                                              |       |      | Summer (JJA) |      |      | Winter (DJF)  |       |      | Summer (JJA) |      |      |
|          | SOAP                                                                                                                                                      | VBS   | PSAT | SOAP         | VBS  | PSAT | SOAP          | VBS   | PSAT | SOAP         | VBS  | PSAT |
|          | <b>Berlin</b>                                                                                                                                             |       |      |              |      |      | <b>Warsaw</b> |       |      |              |      |      |
| GNFR A   | -0.01                                                                                                                                                     | -0.01 | 0.0  | 0.0          | 0.04 | 0.0  | -0.01         | -0.02 | 0.0  | 0.0          | 0.01 | 0.0  |
| GNFR B   | 0.0                                                                                                                                                       | 0.0   | 0.0  | 0.0          | 0.03 | 0.0  | 0.01          | 0.01  | 0.01 | 0.01         | 0.02 | 0.01 |
| GNFR C   | 0.08                                                                                                                                                      | 0.16  | 0.07 | 0.02         | 0.03 | 0.01 | 0.13          | 0.33  | 0.12 | 0.02         | 0.02 | 0.01 |
| GNFR D   | 0.0                                                                                                                                                       | 0.0   | 0.0  | 0.0          | 0.0  | 0.0  | 0.0           | 0.01  | 0.0  | 0.0          | 0.0  | 0.0  |
| GNFR E   | 0.03                                                                                                                                                      | 0.03  | 0.02 | 0.07         | 0.12 | 0.07 | 0.04          | 0.05  | 0.02 | 0.05         | 0.07 | 0.04 |
| GNFR F   | -0.01                                                                                                                                                     | 0.04  | 0.02 | 0.09         | 0.45 | 0.05 | -0.02         | 0.02  | 0.03 | 0.11         | 0.48 | 0.06 |
| GNFR G   | 0.0                                                                                                                                                       | 0.0   | 0.0  | 0.01         | 0.04 | 0.0  | 0.0           | 0.0   | 0.0  | 0.0          | 0.02 | 0.0  |
| GNFR H   | 0.0                                                                                                                                                       | 0.0   | 0.0  | 0.0          | 0.0  | 0.0  | 0.0           | 0.0   | 0.0  | 0.0          | 0.0  | 0.0  |
| GNFR I   | 0.0                                                                                                                                                       | 0.0   | 0.0  | 0.02         | 0.08 | 0.01 | -0.01         | -0.01 | 0.0  | 0.02         | 0.09 | 0.01 |
| GNFR J   | 0.0                                                                                                                                                       | 0.01  | 0.0  | 0.01         | 0.02 | 0.0  | 0.0           | 0.01  | 0.0  | 0.01         | 0.02 | 0.01 |
| GNFR K   | 0.0                                                                                                                                                       | 0.0   | 0.0  | 0.0          | 0.01 | 0.0  | 0.0           | 0.0   | 0.0  | 0.0          | 0.0  | 0.0  |
| GNFR L   | 0.0                                                                                                                                                       | 0.0   | 0.0  | 0.0          | 0.0  | 0.0  | 0.0           | 0.01  | 0.0  | 0.0          | 0.0  | 0.0  |
| BIO      | -                                                                                                                                                         | -     | 0.08 | -            | -    | 0.55 | -             | -     | 0.08 | -            | -    | 0.5  |
| IC       | -                                                                                                                                                         | -     | 0.0  | -            | -    | 0.0  | -             | -     | 0.0  | -            | -    | 0.0  |
| BC       | -                                                                                                                                                         | -     | 0.03 | -            | -    | 0.05 | -             | -     | 0.03 | -            | -    | 0.05 |
| $\Sigma$ | 0.09                                                                                                                                                      | 0.23  | 0.22 | 0.22         | 0.82 | 0.74 | 0.14          | 0.41  | 0.29 | 0.22         | 0.73 | 0.69 |
|          | <b>Munich</b>                                                                                                                                             |       |      |              |      |      | <b>Vienna</b> |       |      |              |      |      |
| GNFR A   | -0.01                                                                                                                                                     | -0.02 | 0.0  | 0.0          | 0.04 | 0.0  | -0.01         | -0.01 | 0.0  | 0.0          | 0.02 | 0.0  |
| GNFR B   | -0.01                                                                                                                                                     | -0.01 | 0.0  | 0.0          | 0.04 | 0.01 | 0.0           | -0.01 | 0.0  | 0.0          | 0.04 | 0.01 |
| GNFR C   | 0.10                                                                                                                                                      | 0.21  | 0.09 | 0.03         | 0.06 | 0.02 | 0.22          | 0.52  | 0.19 | 0.06         | 0.09 | 0.04 |
| GNFR D   | 0.0                                                                                                                                                       | 0.0   | 0.0  | 0.0          | 0.0  | 0.0  | 0.0           | 0.01  | 0.0  | 0.0          | 0.0  | 0.0  |
| GNFR E   | 0.06                                                                                                                                                      | 0.06  | 0.04 | 0.13         | 0.2  | 0.11 | 0.06          | 0.07  | 0.04 | 0.08         | 0.14 | 0.07 |
| GNFR F   | -0.02                                                                                                                                                     | 0.07  | 0.03 | 0.17         | 0.81 | 0.09 | -0.01         | 0.05  | 0.03 | 0.13         | 0.58 | 0.06 |
| GNFR G   | 0.0                                                                                                                                                       | 0.0   | 0.0  | 0.0          | 0.01 | 0.0  | 0.0           | 0.0   | 0.0  | 0.0          | 0.02 | 0.0  |
| GNFR H   | 0.0                                                                                                                                                       | 0.0   | 0.0  | 0.0          | 0.0  | 0.0  | 0.0           | 0.0   | 0.0  | 0.0          | 0.0  | 0.0  |
| GNFR I   | 0.0                                                                                                                                                       | 0.0   | 0.0  | 0.02         | 0.09 | 0.01 | -0.01         | -0.01 | 0.0  | 0.02         | 0.11 | 0.01 |
| GNFR J   | 0.0                                                                                                                                                       | 0.01  | 0.0  | 0.02         | 0.03 | 0.01 | 0.0           | 0.01  | 0.0  | 0.01         | 0.02 | 0.0  |
| GNFR K   | 0.0                                                                                                                                                       | 0.01  | 0.0  | 0.0          | 0.0  | 0.0  | 0.0           | 0.01  | 0.0  | 0.0          | 0.0  | 0.0  |
| GNFR L   | 0.0                                                                                                                                                       | 0.0   | 0.0  | 0.0          | 0.0  | 0.0  | 0.0           | 0.0   | 0.0  | 0.0          | 0.01 | 0.0  |
| BIO      | -                                                                                                                                                         | -     | 0.09 | -            | -    | 0.85 | -             | -     | 0.09 | -            | -    | 0.84 |
| IC       | -                                                                                                                                                         | -     | 0.0  | -            | -    | 0.0  | -             | -     | 0.0  | -            | -    | 0.0  |
| BC       | -                                                                                                                                                         | -     | 0.04 | -            | -    | 0.04 | -             | -     | 0.05 | -            | -    | 0.04 |
| $\Sigma$ | 0.12                                                                                                                                                      | 0.33  | 0.29 | 0.37         | 1.28 | 1.14 | 0.25          | 0.64  | 0.4  | 0.3          | 1.03 | 1.07 |
|          | <b>Budapest</b>                                                                                                                                           |       |      |              |      |      | <b>Prague</b> |       |      |              |      |      |
| GNFR A   | -0.01                                                                                                                                                     | -0.01 | 0.0  | 0.0          | 0.01 | 0.0  | -0.01         | -0.01 | 0.0  | 0.0          | 0.02 | 0.0  |
| GNFR B   | 0.0                                                                                                                                                       | 0.0   | 0.01 | 0.0          | 0.02 | 0.01 | 0.0           | 0.0   | 0.0  | 0.0          | 0.03 | 0.0  |
| GNFR C   | 0.37                                                                                                                                                      | 1.08  | 0.33 | 0.11         | 0.15 | 0.07 | 0.21          | 0.7   | 0.18 | 0.04         | 0.06 | 0.02 |
| GNFR D   | 0.0                                                                                                                                                       | 0.01  | 0.0  | 0.0          | 0.0  | 0.0  | 0.0           | 0.01  | 0.0  | 0.0          | 0.0  | 0.0  |
| GNFR E   | 0.07                                                                                                                                                      | 0.1   | 0.04 | 0.06         | 0.1  | 0.06 | 0.05          | 0.08  | 0.03 | 0.09         | 0.15 | 0.07 |
| GNFR F   | 0.0                                                                                                                                                       | 0.07  | 0.04 | 0.12         | 0.51 | 0.06 | -0.03         | -0.04 | 0.03 | 0.14         | 0.61 | 0.07 |
| GNFR G   | 0.0                                                                                                                                                       | -0.01 | 0.0  | 0.0          | 0.01 | 0.0  | 0.0           | 0.0   | 0.0  | 0.0          | 0.02 | 0.0  |
| GNFR H   | 0.0                                                                                                                                                       | 0.0   | 0.0  | 0.0          | 0.0  | 0.0  | 0.0           | 0.0   | 0.0  | 0.0          | 0.0  | 0.0  |
| GNFR I   | -0.01                                                                                                                                                     | -0.02 | 0.01 | 0.02         | 0.09 | 0.01 | -0.01         | -0.02 | 0.0  | 0.02         | 0.12 | 0.01 |
| GNFR J   | 0.01                                                                                                                                                      | 0.03  | 0.01 | 0.01         | 0.03 | 0.01 | 0.0           | 0.01  | 0.0  | 0.01         | 0.02 | 0.0  |
| GNFR K   | 0.0                                                                                                                                                       | 0.01  | 0.0  | 0.0          | 0.0  | 0.0  | 0.0           | 0.0   | 0.0  | 0.0          | 0.01 | 0.0  |
| GNFR L   | 0.01                                                                                                                                                      | 0.01  | 0.01 | 0.0          | 0.0  | 0.0  | -0.01         | -0.02 | 0.0  | 0.0          | 0.02 | 0.0  |
| BIO      | -                                                                                                                                                         | -     | 0.09 | -            | -    | 0.72 | -             | -     | 0.1  | -            | -    | 0.73 |
| IC       | -                                                                                                                                                         | -     | 0.0  | -            | -    | 0.0  | -             | -     | 0.0  | -            | -    | 0.0  |
| BC       | -                                                                                                                                                         | -     | 0.05 | -            | -    | 0.04 | -             | -     | 0.04 | -            | -    | 0.05 |
| $\Sigma$ | 0.44                                                                                                                                                      | 1.27  | 0.59 | 0.32         | 0.92 | 0.98 | 0.2           | 0.71  | 0.38 | 0.3          | 1.06 | 0.95 |

<sup>1</sup> While the impacts are connected with the SOAP and VBS experiments, the contributions are connected with the PSAT experiment.

<sup>2</sup> The categories considered in the SOAP and VBS experiments are GNFR sectors A–L; the categories considered in the PSAT experiment are GNFR sectors A–L, BIO – biogenic emissions, IC – initial condition, and BC – boundary conditions.
